# Supplementary material for: Recapitulation of Tumor Heterogeneity and Molecular Signatures in a 3D Brain Cancer Model with Decreased Sensitivity to Histone Deacetylase Inhibition
Source: PLoS One. 2012 Dec 18;7(12):e52335. doi: 10.1371/journal.pone.0052335 (PMC3525561; doi:10.1371/journal.pone.0052335)
Supplement: Table S1 — ECM genes PCR array. (XLS) [file pone.0052335.s002.xls]

## Sheet: Sheet1
Position	UniGene	RefSeq	Symbol	Description	Gene Name
A01	Hs.643357	NM_006988	ADAMTS1	ADAM metallopeptidase with thrombospondin type 1 motif, 1	C3-C5, KIAA1346, METH1
A02	Hs.131433	NM_139025	ADAMTS13	ADAM metallopeptidase with thrombospondin type 1 motif, 13	C9orf8, DKFZp434C2322, FLJ42993, MGC118899, MGC118900, TTP, VWFCP, vWF-CP
A03	Hs.271605	NM_007037	ADAMTS8	ADAM metallopeptidase with thrombospondin type 1 motif, 8	ADAM-TS8, FLJ41712, METH2
A04	Hs.502328	NM_000610	CD44	CD44 molecule (Indian blood group)	CDW44, CSPG8, ECMR-III, HCELL, IN, LHR, MC56, MDU2, MDU3, MGC10468, MIC4, MUTCH-I, Pgp1
A05	Hs.461086	NM_004360	CDH1	Cadherin 1, type 1, E-cadherin (epithelial)	Arc-1, CD324, CDHE, ECAD, LCAM, UVO
A06	Hs.143434	NM_001843	CNTN1	Contactin 1	F3, GP135
A07	Hs.523446	NM_080629	COL11A1	Collagen, type XI, alpha 1	CO11A1, COLL6, STL2
A08	Hs.101302	NM_004370	COL12A1	Collagen, type XII, alpha 1	BA209D8.1, COL12A1L, DJ234P15.1
A09	Hs.409662	NM_021110	COL14A1	Collagen, type XIV, alpha 1	UND
A10	Hs.409034	NM_001855	COL15A1	Collagen, type XV, alpha 1	FLJ38566
A11	Hs.368921	NM_001856	COL16A1	Collagen, type XVI, alpha 1	447AA, FP1572
A12	Hs.172928	NM_000088	COL1A1	Collagen, type I, alpha 1	OI4
B01	Hs.508716	NM_001846	COL4A2	Collagen, type IV, alpha 2	DKFZp686I14213, FLJ22259
B02	Hs.210283	NM_000093	COL5A1	Collagen, type V, alpha 1	-
B03	Hs.474053	NM_001848	COL6A1	Collagen, type VI, alpha 1	OPLL
B04	Hs.420269	NM_001849	COL6A2	Collagen, type VI, alpha 2	DKFZp586E1322, FLJ46862, PP3610
B05	Hs.476218	NM_000094	COL7A1	Collagen, type VII, alpha 1	EBD1, EBDCT, EBR1
B06	Hs.654548	NM_001850	COL8A1	Collagen, type VIII, alpha 1	C3orf7, MGC9568
B07	Hs.643801	NM_004385	VCAN	Versican	CSPG2, DKFZp686K06110, ERVR, PG-M, WGN, WGN1
B08	Hs.591346	NM_001901	CTGF	Connective tissue growth factor	CCN2, HCS24, IGFBP8, MGC102839, NOV2
B09	Hs.534797	NM_001903	CTNNA1	Catenin (cadherin-associated protein), alpha 1, 102kDa	CAP102, FLJ36832, FLJ52416
B10	Hs.476018	NM_001904	CTNNB1	Catenin (cadherin-associated protein), beta 1, 88kDa	CTNNB, DKFZp686D02253, FLJ25606, FLJ37923
B11	Hs.166011	NM_001331	CTNND1	Catenin (cadherin-associated protein), delta 1	CAS, CTNND, KIAA0384, P120CAS, P120CTN, p120
B12	Hs.314543	NM_001332	CTNND2	Catenin (cadherin-associated protein), delta 2 (neural plakophilin-related arm-repeat protein)	GT24, NPRAP
C01	Hs.81071	NM_004425	ECM1	Extracellular matrix protein 1	-
C02	Hs.203717	NM_002026	FN1	Fibronectin 1	CIG, DKFZp686F10164, DKFZp686H0342, DKFZp686I1370, DKFZp686O13149, ED-B, FINC, FN, FNZ, GFND, GFND2, LETS, MSF
C03	Hs.57697	NM_001523	HAS1	Hyaluronan synthase 1	HAS
C04	Hs.643447	NM_000201	ICAM1	Intercellular adhesion molecule 1	BB2, CD54, P3.58
C05	Hs.644352	NM_181501	ITGA1	Integrin, alpha 1	CD49a, VLA1
C06	Hs.482077	NM_002203	ITGA2	Integrin, alpha 2 (CD49B, alpha 2 subunit of VLA-2 receptor)	BR, CD49B, GPIa, VLA-2, VLAA2
C07	Hs.265829	NM_002204	ITGA3	Integrin, alpha 3 (antigen CD49C, alpha 3 subunit of VLA-3 receptor)	CD49C, FLJ34631, FLJ34704, GAP-B3, GAPB3, MSK18, VCA-2, VL3A, VLA3a
C08	Hs.694732	NM_000885	ITGA4	Integrin, alpha 4 (antigen CD49D, alpha 4 subunit of VLA-4 receptor)	CD49D, IA4, MGC90518
C09	Hs.505654	NM_002205	ITGA5	Integrin, alpha 5 (fibronectin receptor, alpha polypeptide)	CD49e, FNRA, VLA5A
C10	Hs.133397	NM_000210	ITGA6	Integrin, alpha 6	CD49f, DKFZp686J01244, FLJ18737, ITGA6B, VLA-6
C11	Hs.524484	NM_002206	ITGA7	Integrin, alpha 7	FLJ25220
C12	Hs.171311	NM_003638	ITGA8	Integrin, alpha 8	-
D01	Hs.174103	NM_002209	ITGAL	Integrin, alpha L (antigen CD11A (p180), lymphocyte function-associated antigen 1; alpha polypeptide)	CD11A, LFA-1, LFA1A
D02	Hs.172631	NM_000632	ITGAM	Integrin, alpha M (complement component 3 receptor 3 subunit)	CD11B, CR3A, MAC-1, MAC1A, MGC117044, MO1A, SLEB6
D03	Hs.436873	NM_002210	ITGAV	Integrin, alpha V (vitronectin receptor, alpha polypeptide, antigen CD51)	CD51, DKFZp686A08142, MSK8, VNRA
D04	Hs.643813	NM_002211	ITGB1	Integrin, beta 1 (fibronectin receptor, beta polypeptide, antigen CD29 includes MDF2, MSK12)	CD29, FNRB, GPIIA, MDF2, MSK12, VLA-BETA, VLAB
D05	Hs.375957	NM_000211	ITGB2	Integrin, beta 2 (complement component 3 receptor 3 and 4 subunit)	CD18, LAD, LCAMB, LFA-1, MAC-1, MF17, MFI7
D06	Hs.218040	NM_000212	ITGB3	Integrin, beta 3 (platelet glycoprotein IIIa, antigen CD61)	CD61, GP3A, GPIIIa
D07	Hs.632226	NM_000213	ITGB4	Integrin, beta 4	CD104
D08	Hs.536663	NM_002213	ITGB5	Integrin, beta 5	FLJ26658
D09	Hs.521869	NM_000216	KAL1	Kallmann syndrome 1 sequence	ADMLX, HHA, KAL, KALIG-1, KMS
D10	Hs.270364	NM_005559	LAMA1	Laminin, alpha 1	LAMA
D11	Hs.200841	NM_000426	LAMA2	Laminin, alpha 2	LAMM
D12	Hs.436367	NM_000227	LAMA3	Laminin, alpha 3	BM600, E170, LAMNA, LOCS, lama3a
E01	Hs.650585	NM_002291	LAMB1	Laminin, beta 1	CLM, MGC142015
E02	Hs.497636	NM_000228	LAMB3	Laminin, beta 3	BM600-125KDA, FLJ99565, LAM5, LAMNB1
E03	Hs.609663	NM_002293	LAMC1	Laminin, gamma 1 (formerly LAMB2)	LAMB2, MGC87297
E04	Hs.83169	NM_002421	MMP1	Matrix metallopeptidase 1 (interstitial collagenase)	CLG, CLGN
E05	Hs.2258	NM_002425	MMP10	Matrix metallopeptidase 10 (stromelysin 2)	SL-2, STMY2
E06	Hs.143751	NM_005940	MMP11	Matrix metallopeptidase 11 (stromelysin 3)	SL-3, ST3, STMY3
E07	Hs.1695	NM_002426	MMP12	Matrix metallopeptidase 12 (macrophage elastase)	HME, MGC138506, MME
E08	Hs.2936	NM_002427	MMP13	Matrix metallopeptidase 13 (collagenase 3)	CLG3
E09	Hs.2399	NM_004995	MMP14	Matrix metallopeptidase 14 (membrane-inserted)	MMP-X1, MT1-MMP, MTMMP1
E10	Hs.80343	NM_002428	MMP15	Matrix metallopeptidase 15 (membrane-inserted)	MT2-MMP, MTMMP2, SMCP-2
E11	Hs.546267	NM_005941	MMP16	Matrix metallopeptidase 16 (membrane-inserted)	C8orf57, DKFZp761D112, MMP-X2, MT-MMP2, MT-MMP3, MT3-MMP
E12	Hs.513617	NM_004530	MMP2	Matrix metallopeptidase 2 (gelatinase A, 72kDa gelatinase, 72kDa type IV collagenase)	CLG4, CLG4A, MMP-II, MONA, TBE-1
F01	Hs.375129	NM_002422	MMP3	Matrix metallopeptidase 3 (stromelysin 1, progelatinase)	CHDS6, MGC126102, MGC126103, MGC126104, MMP-3, SL-1, STMY, STMY1, STR1
F02	Hs.2256	NM_002423	MMP7	Matrix metallopeptidase 7 (matrilysin, uterine)	MMP-7, MPSL1, PUMP-1
F03	Hs.161839	NM_002424	MMP8	Matrix metallopeptidase 8 (neutrophil collagenase)	CLG1, HNC, PMNL-CL
F04	Hs.297413	NM_004994	MMP9	Matrix metallopeptidase 9 (gelatinase B, 92kDa gelatinase, 92kDa type IV collagenase)	CLG4B, GELB, MMP-9
F05	Hs.503878	NM_000615	NCAM1	Neural cell adhesion molecule 1	CD56, MSK39, NCAM
F06	Hs.514412	NM_000442	PECAM1	Platelet/endothelial cell adhesion molecule	CD31, FLJ58394, PECAM-1
F07	Hs.89546	NM_000450	SELE	Selectin E	CD62E, ELAM, ELAM1, ESEL, LECAM2
F08	Hs.82848	NM_000655	SELL	Selectin L	CD62L, LAM-1, LAM1, LECAM1, LNHR, LSEL, LYAM1, Leu-8, Lyam-1, PLNHR, TQ1, hLHRc
F09	Hs.73800	NM_003005	SELP	Selectin P (granule membrane protein 140kDa, antigen CD62)	CD62, CD62P, FLJ45155, GMP140, GRMP, LECAM3, PADGEM, PSEL
F10	Hs.371199	NM_003919	SGCE	Sarcoglycan, epsilon	DYT11, ESG
F11	Hs.111779	NM_003118	SPARC	Secreted protein, acidic, cysteine-rich (osteonectin)	ON
F12	Hs.185597	NM_003119	SPG7	Spastic paraplegia 7 (pure and complicated autosomal recessive)	CAR, CMAR, FLJ37308, MGC126331, MGC126332, PGN, SPG5C
G01	Hs.313	NM_000582	SPP1	Secreted phosphoprotein 1	BNSP, BSPI, ETA-1, MGC110940, OPN
G02	Hs.369397	NM_000358	TGFBI	Transforming growth factor, beta-induced, 68kDa	BIGH3, CDB1, CDG2, CDGG1, CSD, CSD1, CSD2, CSD3, EBMD, LCD1
G03	Hs.164226	NM_003246	THBS1	Thrombospondin 1	THBS, THBS-1, TSP, TSP-1, TSP1
G04	Hs.371147	NM_003247	THBS2	Thrombospondin 2	TSP2
G05	Hs.169875	NM_007112	THBS3	Thrombospondin 3	MGC119564, MGC119565, TSP3
G06	Hs.522632	NM_003254	TIMP1	TIMP metallopeptidase inhibitor 1	CLGI, EPA, EPO, FLJ90373, HCI, TIMP
G07	Hs.633514	NM_003255	TIMP2	TIMP metallopeptidase inhibitor 2	CSC-21K
G08	Hs.644633	NM_000362	TIMP3	TIMP metallopeptidase inhibitor 3	HSMRK222, K222, K222TA2, SFD
G09	Hs.476092	NM_003278	CLEC3B	C-type lectin domain family 3, member B	DKFZp686H17246, TN, TNA
G10	Hs.143250	NM_002160	TNC	Tenascin C	HXB, MGC167029, TN
G11	Hs.109225	NM_001078	VCAM1	Vascular cell adhesion molecule 1	CD106, DKFZp779G2333, INCAM-100, MGC99561
G12	Hs.2257	NM_000638	VTN	Vitronectin	V75, VN, VNT
H01	Hs.534255	NM_004048	B2M	Beta-2-microglobulin	-
H02	Hs.412707	NM_000194	HPRT1	Hypoxanthine phosphoribosyltransferase 1	HGPRT, HPRT
H03	Hs.523185	NM_012423	RPL13A	Ribosomal protein L13a	-
H04	Hs.592355	NM_002046	GAPDH	Glyceraldehyde-3-phosphate dehydrogenase	G3PD, GAPD, MGC88685
H05	Hs.520640	NM_001101	ACTB	Actin, beta	PS1TP5BP1
H06	N/A	SA_00105	HGDC	Human Genomic DNA Contamination	HIGX1A
H07	N/A	SA_00104	RTC	Reverse Transcription Control	RTC
H08	N/A	SA_00104	RTC	Reverse Transcription Control	RTC
H09	N/A	SA_00104	RTC	Reverse Transcription Control	RTC
H10	N/A	SA_00103	PPC	Positive PCR Control	PPC
H11	N/A	SA_00103	PPC	Positive PCR Control	PPC
H12	N/A	SA_00103	PPC	Positive PCR Control	PPC
