# Supplementary material for: Recapitulation of Tumor Heterogeneity and Molecular Signatures in a 3D Brain Cancer Model with Decreased Sensitivity to Histone Deacetylase Inhibition
Source: PLoS One. 2012 Dec 18;7(12):e52335. doi: 10.1371/journal.pone.0052335 (PMC3525561; doi:10.1371/journal.pone.0052335)
Supplement: Table S2 — PCR primer data. (XLS) [file pone.0052335.s003.xls]

## Sheet: Sheet1
Gene / microRNA	Sense Primer (5' to 3')	Antisense primer (3' to 5')
SOX2	TACCTCTTCCTCCCACTCCA	GGTAGTGCTGGGACATGTGA
PTPRZ1	GAAAGTTCCTGCCGTCACTC	TCCTAAATGGCCAAATCCAG
S100B	ATGGGAAAGCTCATTGTTGA	CCTCATCGACGTTTTCCAC
MiR34a	GGCAGTGTCTTAGCTGGTTGT	UNIVERSAL
MiR328	CCTCTCTGCCCTTCCGT	UNIVERSAL
MiR149	GCTCCGTGTCTTCACTCCC	UNIVERSAL
SNO U3	GCAAGTTTCTCTGAACGTGTAGAG	UNIVERSAL
