# Supplementary material for: Recapitulation of Tumor Heterogeneity and Molecular Signatures in a 3D Brain Cancer Model with Decreased Sensitivity to Histone Deacetylase Inhibition
Source: PLoS One. 2012 Dec 18;7(12):e52335. doi: 10.1371/journal.pone.0052335 (PMC3525561; doi:10.1371/journal.pone.0052335)
Supplement: Table S4 — Full list genes differentially expressed ECM arrays. (XLS) [file pone.0052335.s005.xls]

## Sheet: Sheet1
KNS 42 cell line				U87 cell line
Gene	P value	Fold change 3d to 2d		Gene	P value	Fold change 3d to 2d
LAMB1	1.35238e-05	-2.32141		ECM1	3.25055e-05	-10.1027
ICAM1	1.38507e-05	11.5648		COL5A1	0.000136109	-7.53357
VCAM1	2.84791e-05	3.74509		MMP9	0.000439978	6.66529
VCAN	4.19424e-05	-2.95878		COL4A2	0.00318664	-4.78991
SELL	4.47497e-05	12.0281		VTN	0.00326376	2.52567
TIMP2	7.5098e-05	-3.97696		PECAM1	0.00349205	3.4822
ITGA1	8.33977e-05	6.73495		ITGAM	0.0037496	6.6499
SELE	8.68041e-05	32.7858		MMP12	0.00385478	7.11074
ITGA4	9.6682e-05	4.24275		SELP	0.00431706	3.00355
SPARC	0.000119715	-1.97475		MMP13	0.00474704	8.87656
COL16A1	0.000157212	5.78239		MMP10	0.00550264	10.9031
RPL13A	0.000159273	1.97475		ITGB3	0.00947778	-11.3399
ITGAL	0.000168777	4.38223		ITGA1	0.0115969	9.10505
TIMP1	0.000267508	2.35926		ADAMTS1	0.0118191	40.2244
MMP10	0.000323934	2.38667		THBS2	0.0124426	11.1322
COL11A1	0.000392095	-2.51693		THBS1	0.013146	-8.7949
MMP7	0.000395732	5.30861		ITGA7	0.0144719	5.45155
FN1	0.000492293	2.62989		HAS1	0.014874	3.37916
COL6A1	0.0005793	2.33755		LAMA2	0.0165792	18.1681
THBS2	0.000610671	2.72263		ADAMTS13	0.0196787	2.94173
ADAMTS1	0.000702629	3.27539		LAMB3	0.0198335	2.56093
ITGA6	0.000798516	-1.6077		SELL	0.0228276	4.28709
ECM1	0.000866173	3.04899		CTNNB1	0.0267869	6.29119
SPG7	0.000905184	-2.00694		CTGF	0.0274749	-6.21893
HPRT1	0.000933911	-1.89868		MMP16	0.0290062	6.98051
MMP11	0.00103493	2.76702		CNTN1	0.0349621	48.1679
ADAMTS13	0.00105599	2.74157		MMP2	0.0357874	-4.2772
MMP1	0.00106777	7.03719		CTNND2	0.0364023	4.76783
SELP	0.00146021	5.54684		ITGA5	0.0365271	-2.14355
VTN	0.00154627	3.66802		ICAM1	0.0374459	13.7688
MMP15	0.00164357	1.83825		LAMA1	0.0383704	2.83497
ITGB4	0.00204034	-2.76063		CTNND1	0.0410009	4.06522
CTGF	0.00238104	-30.7319		ITGA6	0.0434189	3.37916
LAMB3	0.00262972	2.33755		COL7A1	0.0434783	-8.5544
CTNND1	0.00263123	-1.83401		ITGA2	0.0477125	7.72749
ITGA3	0.00270302	-1.90748
COL6A2	0.00276407	-1.53156
SPP1	0.00278579	-2.01159
TGFBI	0.00374762	4.72943
CNTN1	0.00406532	3.3597
CTNNB1	0.00410347	-1.51747
COL7A1	0.00434558	2.05385
HAS1	0.0053502	2.34838
ITGA5	0.00564321	1.51397
ITGB3	0.00590902	1.88557
COL14A1	0.00710454	2.63597
ADAMTS8	0.00717814	2.60569
MMP14	0.0079071	-1.76337
LAMA2	0.00862046	2.15596
ITGA8	0.0139319	5.63728
THBS3	0.0168354	-1.2643
MMP9	0.0233618	1.80042
THBS1	0.0234945	-2.02558
CDH1	0.0247854	89.1605
GAPDH	0.0280411	1.82555
MMP3	0.0282041	2.49955
COL1A1	0.0352526	-1.93411
ITGB5	0.0356351	-1.25266
ITGB1	0.0392665	-1.38032
ITGA7	0.0424909	-3.3909
