# Supplementary material for: Recapitulation of Tumor Heterogeneity and Molecular Signatures in a 3D Brain Cancer Model with Decreased Sensitivity to Histone Deacetylase Inhibition
Source: PLoS One. 2012 Dec 18;7(12):e52335. doi: 10.1371/journal.pone.0052335 (PMC3525561; doi:10.1371/journal.pone.0052335)
Supplement: Table S5 — Full list genes differentially expressed U87 3d vs. 2d. (XLS) [file pone.0052335.s006.xls]

## Sheet: Sheet1
Probe Set ID	Gene Symbol	Corrected p-value	p-value	regulation	Fold change
209170_s_at	GPM6B	1.13175e-09	1.15918e-12	up	572.659
209167_at	GPM6B	1.84171e-10	7.07379e-14	up	540.751
211959_at	IGFBP5	2.57101e-10	1.31057e-13	up	433.335
228038_at	SOX2	4.19494e-12	4.6035e-16	up	409.13
231898_x_at	SOX2OT	1.89075e-11	3.80398e-15	up	372.922
204469_at	PTPRZ1	4.91127e-10	3.95237e-13	up	353.686
209278_s_at	TFPI2	3.35088e-10	1.77733e-13	down	-351.239
202149_at	NEDD9	1.08901e-11	1.39425e-15	up	340.641
206070_s_at	EPHA3	4.82213e-14	8.81962e-19	up	326.628
202291_s_at	MGP	4.35555e-07	4.66349e-09	up	304.671
216623_x_at	TOX3	7.15998e-14	2.61911e-18	up	299.674
214774_x_at	TOX3	4.08523e-12	3.60753e-16	up	285.142
209470_s_at	GPM6A	4.57054e-08	2.26542e-10	up	272.295
213436_at	CNR1	8.14931e-10	7.60155e-13	up	243.904
209469_at	GPM6A	2.27267e-06	3.96549e-08	up	226.347
202007_at	NID1	1.74022e-08	5.66546e-11	up	208.491
215108_x_at	TOX3	8.62489e-09	2.2558e-11	up	207.066
204273_at	EDNRB	3.38743e-10	1.92063e-13	up	203.302
209169_at	GPM6B	1.02029e-07	6.66318e-10	up	196.287
238623_at		5.3726e-07	6.16118e-09	up	192.936
210809_s_at	POSTN	2.89558e-07	2.78569e-09	up	176.929
209168_at	GPM6B	5.04139e-10	4.2415e-13	up	168.015
205767_at	EREG	1.01631e-07	6.56163e-10	down	-166.104
204602_at	DKK1	2.54324e-09	3.76776e-12	up	161.324
212560_at	SORL1	4.34229e-10	2.85912e-13	up	153.417
231867_at	ODZ2	2.175e-07	1.87734e-09	up	153.084
209277_at	TFPI2	1.13076e-08	3.18496e-11	down	-153
217388_s_at	KYNU	2.10889e-09	2.85429e-12	down	-147.833
205029_s_at	FABP7	5.12976e-09	1.08834e-11	up	141.026
207173_x_at	CDH11	5.9461e-06	1.43445e-07	up	131.736
218469_at	GREM1	8.48186e-09	2.17185e-11	down	-126.24
209031_at	CADM1	7.59174e-08	4.40939e-10	up	123.749
217871_s_at	MIF	1.54937e-08	4.73241e-11	down	-121.025
232054_at	PCDH20	2.32013e-08	8.8689e-11	up	119.167
235763_at	SLC44A5	1.84875e-10	7.43896e-14	up	117.302
209686_at	S100B	8.02481e-08	4.79947e-10	up	115.63
205030_at	FABP7	9.85055e-09	2.66645e-11	up	107.846
230250_at	PTPRB	4.34229e-10	2.84991e-13	up	106.519
225123_at		6.26148e-07	7.49944e-09	up	104.662
218468_s_at	GREM1	2.80312e-07	2.68648e-09	down	-99.5999
37892_at	COL11A1	1.02583e-06	1.43719e-08	up	96.8433
215076_s_at	COL3A1	4.41622e-06	9.58767e-08	up	96.1481
214247_s_at	DKK3	0.000321424	2.60255e-05	up	95.3686
203889_at	SCG5	2.51035e-10	1.19376e-13	down	-94.2057
224724_at	SULF2	4.6277e-09	9.39506e-12	up	92.663
237435_at		4.08523e-12	3.73593e-16	up	89.1816
202037_s_at	SFRP1	1.24039e-08	3.65293e-11	up	87.5005
212599_at	AUTS2	7.738e-09	1.93892e-11	up	84.6041
214023_x_at	TUBB2B	5.7678e-09	1.28701e-11	up	84.4061
214612_x_at	MAGEA6	5.9391e-10	5.1054e-13	up	84.028
205000_at	DDX3Y	2.73144e-05	1.03612e-06	up	82.3239
230472_at	IRX1	2.94193e-09	4.59453e-12	up	82.2157
221024_s_at	SLC2A10	1.37464e-09	1.48811e-12	up	79.6611
212012_at	PXDN	4.52083e-08	2.22424e-10	up	77.4758
229256_at	PGM2L1	1.79066e-08	5.92791e-11	up	76.9537
203608_at	ALDH5A1	1.89075e-11	2.87465e-15	up	75.2147
213233_s_at	KLHL9	1.73667e-08	5.62216e-11	up	74.1868
242455_at	POU3F2	1.50152e-08	4.53135e-11	up	73.8197
204105_s_at	NRCAM	5.65098e-09	1.2196e-11	up	73.7983
202718_at	IGFBP2	1.85619e-08	6.40028e-11	up	72.6804
224941_at	PAPPA	2.37335e-08	9.15915e-11	down	-72.1519
1555778_a_at	POSTN	4.26271e-09	7.9513e-12	up	70.1591
212865_s_at	COL14A1	5.46347e-11	1.49889e-14	up	69.6427
202820_at	AHR	4.15712e-11	9.124e-15	down	-69.3021
226122_at	PLEKHG1	2.57101e-10	1.31666e-13	up	68.5255
209942_x_at	MAGEA3	8.90007e-09	2.34405e-11	up	68.3874
206307_s_at	FOXD1	2.51035e-10	1.1868e-13	down	-67.8859
201110_s_at	THBS1	9.15116e-11	3.1801e-14	up	67.5571
219304_s_at	PDGFD	3.03429e-09	5.10534e-12	up	67.5507
212148_at	PBX1	2.07332e-10	8.72177e-14	up	67.022
212730_at	SYNM	1.9118e-08	6.75032e-11	up	66.8971
215193_x_at	HLA-DRB1 /// HLA-DRB3 /// HLA-DRB4	2.06027e-08	7.49873e-11	down	-65.8527
228494_at	PPP1R9A	2.06559e-09	2.74009e-12	up	65.6018
228750_at		9.15116e-11	3.15678e-14	up	65.577
221605_s_at	PIPOX	4.08816e-09	7.4199e-12	up	65.4226
216598_s_at	CCL2	5.76655e-05	2.75203e-06	up	65.0009
202075_s_at	PLTP	2.84191e-08	1.13832e-10	down	-64.9747
1552767_a_at	HS6ST2	6.48365e-11	2.01595e-14	up	64.1617
229553_at	PGM2L1	2.68381e-07	2.52796e-09	up	64.1457
201852_x_at	COL3A1	1.18707e-06	1.70869e-08	up	63.9078
219932_at	SLC27A6	2.28288e-09	3.21502e-12	up	63.8974
203131_at	PDGFRA	5.21974e-07	5.93512e-09	up	63.8821
215446_s_at	LOX	6.25175e-09	1.45217e-11	down	-63.5089
219935_at	ADAMTS5	9.48882e-10	9.02457e-13	down	-62.5118
201842_s_at	EFEMP1	0.000502816	4.6111e-05	up	62.2748
229623_at	FLJ12993	8.62489e-09	2.23535e-11	up	60.7524
235683_at	SESN3	9.97694e-08	6.4232e-10	up	60.1774
209312_x_at	HLA-DRB1 /// HLA-DRB4 /// HLA-DRB5	2.99186e-09	4.81543e-12	down	-59.8785
235489_at	RHOJ	5.56232e-11	1.62775e-14	up	59.7106
203868_s_at	VCAM1	5.7678e-09	1.28633e-11	up	59.4022
39402_at	IL1B	8.16255e-07	1.06893e-08	down	-59.1892
1554007_at		9.94561e-07	1.36064e-08	up	58.7769
218824_at	PNMAL1	1.7669e-08	5.78464e-11	up	57.4455
203548_s_at	LPL	8.62234e-08	5.29075e-10	up	56.6964
1554547_at	FAM13C	2.84191e-08	1.13715e-10	up	55.1681
221933_at	NLGN4X	2.02259e-09	2.54457e-12	up	54.4241
211161_s_at	COL3A1	3.91062e-06	8.11777e-08	up	53.9067
227481_at	CNKSR3	1.70365e-08	5.41147e-11	up	53.2893
230030_at	HS6ST2	3.1644e-09	5.42253e-12	up	53.1197
222853_at	FLRT3	1.08104e-07	7.27612e-10	up	52.5791
203980_at	FABP4	4.66091e-06	1.03746e-07	up	52.5154
223204_at	C4orf18	3.27699e-07	3.25451e-09	up	52.3051
224940_s_at	PAPPA	2.06559e-09	2.72287e-12	down	-52.2642
201843_s_at	EFEMP1	0.000156699	1.01916e-05	up	52.0325
224435_at	C10orf58	6.34409e-10	5.68561e-13	down	-50.7331
212013_at	PXDN	1.29005e-07	9.08403e-10	up	50.1925
236029_at	FAT3	6.06709e-09	1.36489e-11	up	50.1043
44783_s_at	HEY1	6.22027e-08	3.37891e-10	up	49.737
211980_at	COL4A1	1.7507e-06	2.86901e-08	up	49.677
226109_at	C21orf91	8.60519e-05	4.60675e-06	up	49.5533
209348_s_at	MAF	7.19991e-06	1.8199e-07	up	49.4905
235874_at	PRSS35	4.38085e-08	2.10729e-10	up	49.2371
203963_at	CA12	7.11366e-09	1.73044e-11	down	-48.5794
236024_at	GPM6A	3.20803e-07	3.16843e-09	up	48.3671
225864_at	FAM84B	6.01252e-08	3.23307e-10	up	47.729
226189_at	ITGB8	1.23383e-06	1.8279e-08	up	47.3389
221805_at	NEFL	4.82433e-10	3.79417e-13	up	47.0259
201909_at	RPS4Y1	4.08816e-09	7.4772e-12	up	46.4641
222668_at	KCTD15	4.33065e-10	2.53463e-13	up	46.0633
212230_at	PPAP2B	2.175e-07	1.86999e-09	down	-45.9976
204271_s_at	EDNRB	4.18402e-07	4.43082e-09	up	45.7793
201008_s_at	TXNIP	4.565e-06	1.01194e-07	down	-45.7069
210735_s_at	CA12	3.23149e-08	1.35938e-10	down	-44.6128
205067_at	IL1B	4.03615e-06	8.54593e-08	down	-44.2742
211990_at	HLA-DPA1	6.26952e-08	3.41713e-10	down	-44.2233
205003_at	DOCK4	3.195e-08	1.33819e-10	up	44.1618
203881_s_at	DMD	4.34229e-10	2.76568e-13	up	44.161
1558700_s_at	ZNF260	4.78195e-11	1.137e-14	up	44.0244
206295_at	IL18	1.89075e-11	3.27754e-15	up	43.149
212372_at	MYH10	3.12948e-08	1.30338e-10	up	43.1169
215856_at	SIGLEC15	1.84871e-07	1.48099e-09	down	-42.9853
218839_at	HEY1	4.92439e-09	1.02676e-11	up	42.7311
213849_s_at	PPP2R2B	1.0146e-06	1.41219e-08	up	42.5207
209618_at	CTNND2	9.50192e-10	9.21082e-13	up	41.8842
229357_at	ADAMTS5	4.28952e-09	8.18368e-12	down	-41.8744
204671_s_at	ANKRD6	5.03858e-11	1.29017e-14	up	41.8149
204298_s_at	LOX	5.45807e-07	6.27141e-09	down	-41.4765
204260_at	CHGB	5.01252e-07	5.62818e-09	up	41.3331
202295_s_at	CTSH	2.39354e-07	2.15586e-09	up	41.1307
202196_s_at	DKK3	0.000325799	2.64812e-05	up	40.814
208894_at	HLA-DRA	4.06569e-06	8.64075e-08	down	-40.5285
214329_x_at	TNFSF10	1.96653e-09	2.35969e-12	up	40.4092
223434_at	GBP3	1.37999e-05	4.25797e-07	up	40.2615
202688_at	TNFSF10	3.03429e-09	5.1057e-12	up	40.2538
207057_at	SLC16A7	6.45045e-06	1.5868e-07	down	-40.0227
227705_at	TCEAL7	1.06482e-09	1.05167e-12	down	-39.6946
204320_at	COL11A1	1.62878e-05	5.2934e-07	up	39.5525
221886_at	DENND2A	1.9118e-08	6.78354e-11	up	39.0623
208383_s_at	PCK1	3.7053e-08	1.64002e-10	up	38.9867
205234_at	SLC16A4	5.61583e-07	6.51619e-09	up	38.8615
228640_at	PCDH7	4.43919e-08	2.15864e-10	down	-38.0781
202687_s_at	TNFSF10	3.40053e-09	5.90856e-12	up	38.042
224942_at	PAPPA	6.76727e-07	8.38585e-09	down	-37.413
225996_at	LONRF2	1.97086e-07	1.6185e-09	up	37.0229
213338_at	TMEM158	2.94193e-09	4.62745e-12	down	-36.991
200795_at	SPARCL1	3.06348e-08	1.25864e-10	up	36.8985
201427_s_at	SEPP1	2.79068e-08	1.10249e-10	up	36.6659
212226_s_at	PPAP2B	1.83352e-09	2.14624e-12	down	-36.4157
203562_at	FEZ1	0.000544412	5.09781e-05	up	36.3767
209493_at	PDZD2	5.25111e-08	2.66997e-10	up	36.2649
210367_s_at	PTGES	2.61006e-07	2.44417e-09	down	-36.0097
209687_at	CXCL12	1.07253e-08	2.9817e-11	up	36.0094
213423_x_at	TUSC3	1.97353e-05	6.81127e-07	up	35.8562
211564_s_at	PDLIM4	4.82433e-10	3.63976e-13	up	35.5995
228128_x_at	PAPPA	7.01516e-08	3.96856e-10	down	-35.5904
229201_at		5.0842e-06	1.16795e-07	up	35.519
213721_at	SOX2	9.36074e-08	5.85528e-10	up	35.4454
1558846_at	PNLIPRP3	5.18909e-08	2.61946e-10	down	-35.3645
236179_at	CDH11	3.31865e-08	1.40819e-10	up	34.9656
212353_at	SULF1	8.62489e-09	2.24366e-11	up	34.7683
223075_s_at	AIF1L	9.76465e-08	6.16151e-10	up	34.3947
208690_s_at	PDLIM1	1.89075e-11	3.58195e-15	down	-34.2434
201859_at	SRGN	5.95579e-07	7.03692e-09	down	-34.2212
210663_s_at	KYNU	1.52945e-07	1.1637e-09	down	-34.0386
200650_s_at	LDHA	8.26664e-13	4.53588e-17	down	-33.951
209617_s_at	CTNND2	4.26271e-09	7.95238e-12	up	33.8218
204409_s_at	EIF1AY	0.000669716	6.65245e-05	up	33.7548
206710_s_at	EPB41L3	1.77461e-09	2.01236e-12	up	33.4697
215017_s_at	FNBP1L	5.19935e-07	5.89592e-09	up	33.2702
230272_at	LOC645323	4.56092e-07	5.00513e-09	up	32.8878
235368_at	ADAMTS5	5.36451e-06	1.25206e-07	down	-32.5289
218691_s_at	PDLIM4	1.1376e-08	3.22502e-11	up	32.4257
203549_s_at	LPL	4.89242e-08	2.4339e-10	up	32.2963
1559965_at	LOC100192378	5.04139e-10	4.22352e-13	up	32.2834
228920_at	ZNF260	4.28952e-09	8.23776e-12	up	32.1414
203939_at	NT5E	2.2056e-08	8.31007e-11	down	-32.129
229011_at		2.58307e-09	3.92127e-12	down	-32.07
210467_x_at	MAGEA12	3.30261e-07	3.29808e-09	up	32.0683
209283_at	CRYAB	8.73721e-08	5.40133e-10	up	32.0532
228186_s_at	RSPO3	1.64061e-07	1.27625e-09	down	-31.9614
227196_at	RHPN2	7.82655e-08	4.65227e-10	up	31.7298
1552511_a_at	CPA6	3.00405e-09	4.89e-12	up	31.6364
225817_at	CGNL1	1.19626e-06	1.7438e-08	up	31.5256
209355_s_at	PPAP2B	1.31225e-07	9.33636e-10	down	-31.1533
218404_at	SNX10	6.21194e-09	1.41129e-11	up	31.1057
217627_at	ZNF573	1.79074e-08	5.99369e-11	up	31.1041
222774_s_at	NETO2	4.3005e-09	8.40026e-12	down	-30.9166
227856_at	C4orf32	3.58704e-09	6.29822e-12	down	-30.775
237885_at		1.37464e-09	1.49695e-12	up	30.701
221645_s_at	ZNF83	4.82433e-10	3.58024e-13	up	30.6543
1555997_s_at	IGFBP5	7.59174e-08	4.49881e-10	up	30.4454
229281_at	NPAS3	1.37699e-07	9.97261e-10	up	30.3856
227510_x_at	MALAT1	0.00774462	0.00152144	down	-30.3769
202554_s_at	GSTM3	4.75015e-06	1.06601e-07	up	30.322
225619_at	SLAIN1	7.15039e-05	3.62085e-06	up	30.1616
228850_s_at		4.82433e-10	3.42601e-13	up	30.1251
238332_at	ANKRD29	1.9052e-05	6.4883e-07	down	-30.0592
218435_at	DNAJC15	4.53151e-08	2.23778e-10	down	-29.9352
206513_at	AIM2	2.02259e-09	2.55251e-12	down	-29.8576
207996_s_at	C18orf1	1.1848e-08	3.4455e-11	up	29.0905
235456_at		9.78048e-07	1.33269e-08	up	29.0811
219263_at	RNF128	3.09965e-06	5.93568e-08	down	-28.9809
201009_s_at	TXNIP	2.175e-07	1.88126e-09	down	-28.935
228737_at	TOX2	1.50374e-05	4.77732e-07	down	-28.9213
218678_at	NES	5.5669e-07	6.41454e-09	up	28.7291
227550_at	GFRA1	1.85619e-08	6.39845e-11	up	28.7038
206632_s_at	APOBEC3B	4.52878e-07	4.96157e-09	down	-28.7038
202936_s_at	SOX9	8.54637e-06	2.30066e-07	up	28.3659
227439_at	ANKS1B	1.39273e-06	2.13718e-08	up	28.0149
233555_s_at	SULF2	2.06027e-08	7.49013e-11	up	27.5942
204672_s_at	ANKRD6	2.06027e-08	7.43652e-11	up	27.5069
220301_at	CCDC102B	6.42851e-08	3.55082e-10	up	27.4488
209443_at	SERPINA5	1.72588e-07	1.36949e-09	up	27.4348
239058_at		4.97229e-08	2.49183e-10	down	-27.3054
207419_s_at	RAC2	7.40283e-07	9.34239e-09	down	-27.2948
204420_at	FOSL1	3.47851e-06	6.94749e-08	down	-27.1845
227345_at	TNFRSF10D	2.9198e-08	1.17486e-10	down	-27.0898
226069_at	PRICKLE1	2.06559e-09	2.7579e-12	up	27.0724
202391_at	BASP1	1.4789e-05	4.68218e-07	down	-27.0617
205466_s_at	HS3ST1	1.51721e-07	1.14051e-09	up	27.0565
232090_at	LOC100128178	9.17707e-09	2.43379e-11	up	27.0508
218162_at	OLFML3	8.92484e-05	4.81705e-06	down	-27.0459
226374_at		4.66893e-05	2.09111e-06	up	27.0347
229912_at	SDK1	3.73448e-08	1.65977e-10	up	26.9811
239218_at	PDE1C	4.34229e-10	2.66931e-13	up	26.9319
207510_at	BDKRB1	9.03537e-07	1.19976e-08	down	-26.8826
1553995_a_at	NT5E	2.28356e-05	8.26133e-07	down	-26.8404
205568_at	AQP9	7.11294e-08	4.05896e-10	down	-26.7948
201445_at	CNN3	1.26034e-05	3.78275e-07	up	26.6606
214751_at	ZNF468	2.69557e-07	2.55876e-09	up	26.5723
1555929_s_at		2.98131e-08	1.20506e-10	up	26.3993
211026_s_at	MGLL	1.83352e-09	2.14017e-12	down	-26.3696
205286_at	TFAP2C	1.32605e-05	4.05273e-07	up	26.2804
214078_at		5.35853e-05	2.48742e-06	up	26.2583
226490_at	NHSL1	2.75827e-09	4.23767e-12	up	26.1555
206029_at	ANKRD1	6.28903e-08	3.45077e-10	up	26.0014
1564838_a_at	LOC151760	0.00067315	6.69272e-05	down	-25.9748
231940_at	ZNF529	2.08622e-08	7.64803e-11	up	25.7083
1558048_x_at		0.014211	0.00334489	up	25.6995
216733_s_at	GATM	7.86441e-07	1.00544e-08	up	25.6115
204508_s_at	CA12	1.89902e-08	6.66872e-11	down	-25.5853
212909_at	LYPD1	2.22435e-06	3.8649e-08	up	25.5758
227623_at		9.40559e-07	1.26784e-08	down	-25.5568
231325_at	UNC5D	2.46599e-08	9.60233e-11	up	25.2682
217757_at	A2M	6.71279e-07	8.23828e-09	up	25.2419
239292_at		1.10869e-09	1.11528e-12	up	25.2336
221974_at	IPW	5.48292e-06	1.28863e-07	up	25.1793
218736_s_at	PALMD	1.52829e-07	1.156e-09	down	-24.9546
232067_at	C6orf168	1.00995e-08	2.77079e-11	up	24.8337
225238_at	MSI2	1.24039e-08	3.67523e-11	up	24.8283
201010_s_at	TXNIP	6.85441e-08	3.84875e-10	down	-24.7355
228956_at	UGT8	2.45417e-07	2.24433e-09	down	-24.6399
212681_at	EPB41L3	9.62867e-08	6.04048e-10	up	24.6315
203231_s_at	ATXN1	1.18001e-05	3.4661e-07	up	24.5706
227875_at	KLHL13	0.00102458	0.000114985	up	24.4159
211709_s_at	CLEC11A	1.70843e-08	5.49948e-11	down	-24.3102
229614_at	ZNF320	6.56507e-08	3.65026e-10	up	24.1833
201858_s_at	SRGN	0.000129425	7.93678e-06	down	-24.1637
218051_s_at	NT5DC2	3.07319e-06	5.86814e-08	down	-24.0496
212328_at	LIMCH1	7.4218e-06	1.89522e-07	up	23.8491
204385_at	KYNU	3.47121e-08	1.50467e-10	down	-23.8281
209504_s_at	PLEKHB1	5.38324e-08	2.78639e-10	up	23.7561
227449_at	EPHA4	2.74717e-06	5.05972e-08	up	23.7328
1554195_a_at	C5orf46	6.76727e-07	8.39178e-09	up	23.7007
212826_s_at	SLC25A6	4.69997e-06	1.04874e-07	up	23.5539
218888_s_at	NETO2	6.09301e-07	7.26592e-09	down	-23.4564
206701_x_at	EDNRB	1.11308e-07	7.53247e-10	up	23.4485
236277_at		4.8383e-06	1.09452e-07	up	23.4104
201389_at	ITGA5	1.70365e-08	5.39744e-11	down	-23.4022
228396_at	PRKG1	2.68777e-07	2.5366e-09	down	-23.3627
204051_s_at	SFRP4	1.31564e-05	4.01249e-07	up	23.3605
201417_at	SOX4	9.36193e-05	5.1557e-06	up	23.3003
204984_at	GPC4	3.78532e-08	1.69314e-10	up	23.2852
203186_s_at	S100A4	2.38328e-06	4.22386e-08	up	23.1103
218706_s_at	GRAMD3	3.36988e-05	1.36752e-06	up	23.0077
228155_at	C10orf58	2.175e-07	1.88243e-09	down	-22.9869
202203_s_at	AMFR	7.36845e-08	4.21825e-10	up	22.826
218538_s_at	MRS2	0.000215728	1.54748e-05	up	22.8124
206059_at	ZNF91	4.40971e-05	1.93238e-06	up	22.6229
223681_s_at	INADL	2.02259e-09	2.49625e-12	up	22.5422
1553605_a_at	ABCA13	6.2766e-06	1.536e-07	up	22.4095
203178_at	GATM	3.64983e-08	1.59544e-10	up	22.388
233223_at		2.55438e-07	2.35807e-09	up	22.3176
236335_at		1.79074e-08	5.96873e-11	up	22.1907
202310_s_at	COL1A1	8.96966e-05	4.85272e-06	down	-22.1208
1568604_a_at	CADPS	1.70365e-08	5.41586e-11	down	-22.0158
202890_at	MAP7	1.28144e-06	1.91751e-08	up	21.9433
230869_at	FAM155A	1.05638e-05	2.98124e-07	down	-21.9355
203632_s_at	GPRC5B	2.30547e-09	3.28901e-12	up	21.9314
232122_s_at	VEPH1	4.08434e-08	1.90491e-10	down	-21.92
235728_at	ZFP3	9.68997e-09	2.60526e-11	up	21.9005
204529_s_at	TOX	7.16617e-05	3.63977e-06	up	21.7837
219295_s_at	PCOLCE2	1.9975e-07	1.6539e-09	down	-21.776
223315_at	NTN4	8.74538e-05	4.70579e-06	up	21.6979
222392_x_at	PERP	2.38257e-06	4.20517e-08	down	-21.6382
209032_s_at	CADM1	3.0122e-09	4.95835e-12	up	21.5314
213418_at	HSPA6	5.88722e-06	1.41164e-07	up	21.3997
228708_at	RAB27B	4.34611e-08	2.07468e-10	down	-21.3764
230836_at	ST8SIA4	4.04522e-05	1.72093e-06	up	21.2741
218087_s_at	SORBS1	0.000144785	9.20219e-06	up	21.2554
242943_at	ST8SIA4	5.28291e-08	2.69581e-10	up	21.1846
229327_s_at		7.738e-09	1.93293e-11	up	21.179
209082_s_at	COL18A1	1.2919e-05	3.91291e-07	up	21.0787
228335_at	CLDN11	9.45681e-06	2.60262e-07	up	21.0708
228492_at	USP9Y	2.38646e-09	3.49185e-12	up	21.0704
213155_at	WSCD1	4.76494e-09	9.76082e-12	up	21.056
202345_s_at	FABP5	3.37975e-08	1.4403e-10	down	-21.0077
235048_at	FAM169A	2.21674e-07	1.938e-09	up	20.9962
209871_s_at	APBA2	3.71718e-06	7.58734e-08	up	20.9812
201860_s_at	PLAT	1.73858e-06	2.83006e-08	up	20.9563
232424_at	PRDM16	4.82433e-10	3.68061e-13	up	20.9303
203434_s_at	MME	4.90867e-08	2.45097e-10	down	-20.9207
231755_at	IL1F8	4.17292e-06	8.96619e-08	down	-20.9096
238850_at	LOC645323	1.1629e-05	3.4031e-07	up	20.8889
211991_s_at	HLA-DPA1	4.47822e-06	9.81236e-08	down	-20.8831
209897_s_at	SLIT2	2.25233e-07	1.99097e-09	up	20.8379
230875_s_at	ATP11A	2.38328e-06	4.22004e-08	up	20.7452
230261_at	ST8SIA4	1.05731e-07	7.00041e-10	up	20.7026
218503_at	KIAA1797	6.76456e-07	8.36368e-09	up	20.6979
209883_at	GLT25D2	4.11561e-08	1.93454e-10	up	20.685
209094_at	DDAH1	1.75293e-05	5.80303e-07	up	20.6815
203139_at	DAPK1	1.011e-06	1.39658e-08	up	20.6219
212354_at	SULF1	2.52743e-08	9.89245e-11	up	20.6152
205924_at	RAB3B	7.27579e-05	3.70742e-06	down	-20.588
206121_at	AMPD1	2.18652e-07	1.89959e-09	up	20.5759
229700_at	ZNF738	9.43861e-06	2.59198e-07	up	20.4749
235940_at	C9orf64	9.19477e-08	5.73464e-10	down	-20.4392
222379_at	KCNE4	4.83726e-06	1.09264e-07	up	20.439
230925_at	APBB1IP	1.08698e-07	7.33599e-10	down	-20.3941
229302_at	TMEM178	1.89939e-05	6.45462e-07	up	20.2765
226051_at	SELM	4.56176e-06	1.01039e-07	down	-20.2456
227399_at	VGLL3	6.208e-06	1.51013e-07	down	-20.2249
242871_at	PAQR5	4.3369e-05	1.88682e-06	down	-20.1949
203153_at	IFIT1	9.57845e-06	2.65006e-07	up	20.0799
235648_at	ZNF567	9.83611e-07	1.34386e-08	up	19.9966
244741_s_at	MGC9913	6.57359e-09	1.55097e-11	up	19.9868
214321_at	NOV	1.72762e-06	2.80563e-08	down	-19.9482
205440_s_at	NPY1R	1.17627e-08	3.38393e-11	up	19.9395
203962_s_at	NEBL	1.47129e-08	4.41319e-11	up	19.9383
206204_at	GRB14	2.08941e-07	1.777e-09	down	-19.87
203485_at	RTN1	5.83611e-07	6.83311e-09	down	-19.8569
223044_at	SLC40A1	1.17627e-08	3.39918e-11	up	19.8461
227889_at	LPCAT2	2.25545e-09	3.13514e-12	up	19.8297
227388_at	TUSC1	5.61583e-07	6.5294e-09	down	-19.7768
210982_s_at	HLA-DRA	1.66423e-05	5.4485e-07	down	-19.7578
209030_s_at	CADM1	4.23374e-08	2.00556e-10	up	19.7213
229004_at		6.30219e-07	7.59606e-09	up	19.7113
205990_s_at	WNT5A	3.99025e-09	7.15216e-12	down	-19.5596
202628_s_at	SERPINE1	5.54646e-08	2.88981e-10	down	-19.5098
207390_s_at	SMTN	4.73582e-07	5.21438e-09	down	-19.4307
224341_x_at	TLR4	4.3005e-09	8.41616e-12	up	19.1888
207443_at	NR2E1	6.4664e-08	3.58358e-10	up	19.1493
209392_at	ENPP2	1.15739e-05	3.37002e-07	down	-19.1442
206826_at	PMP2	3.29676e-06	6.40359e-08	up	19.1429
219073_s_at	OSBPL10	7.25484e-05	3.69277e-06	up	19.1374
212151_at	PBX1	1.28246e-05	3.87259e-07	up	19.1314
209829_at	FAM65B	1.8466e-08	6.28198e-11	up	19.1096
227452_at		2.46599e-08	9.60688e-11	up	19.0381
215867_x_at	CA12	5.7678e-09	1.26841e-11	down	-19.0232
1558943_x_at	ZNF765	4.66893e-05	2.0913e-06	up	18.9621
218803_at	CHFR	2.22684e-07	1.95465e-09	up	18.9513
201416_at	SOX4	5.79682e-05	2.77145e-06	up	18.9097
231930_at	ELMOD1	2.01249e-07	1.67845e-09	up	18.8704
238417_at	PGM2L1	4.82433e-10	3.7616e-13	up	18.8358
204983_s_at	GPC4	4.18402e-07	4.42528e-09	up	18.8317
218974_at	SOBP	1.1959e-06	1.74108e-08	up	18.7366
205816_at	ITGB8	1.80884e-08	6.08735e-11	up	18.7318
205828_at	MMP3	0.000507147	4.65638e-05	down	-18.4883
228372_at	C10orf128	2.41027e-07	2.19224e-09	down	-18.4188
204523_at	ZNF140	3.34735e-07	3.36724e-09	up	18.218
227822_at	ZNF605	2.483e-10	1.08993e-13	up	18.1657
203705_s_at	FZD7	1.04622e-07	6.9078e-10	up	18.1107
213895_at	EMP1	9.75254e-08	6.13603e-10	down	-18.0589
224209_s_at	GDA	3.83227e-07	3.95318e-09	up	18.0411
227498_at	SOX6	4.50747e-08	2.20942e-10	up	17.9939
231984_at	MTAP	1.69e-08	5.22378e-11	up	17.9678
219250_s_at	FLRT3	6.64753e-07	8.13387e-09	up	17.919
233814_at	EFNA5	9.26228e-07	1.24513e-08	down	-17.9081
203028_s_at	CYBA	1.00045e-05	2.7868e-07	down	-17.8299
228731_at		1.98676e-06	3.39029e-08	up	17.8076
204415_at	IFI6	7.92684e-06	2.08048e-07	up	17.7989
203917_at	CXADR	0.000410152	3.55128e-05	up	17.7452
204945_at	PTPRN	4.41641e-07	4.76576e-09	down	-17.7451
238581_at	GBP5	2.25446e-08	8.5354e-11	up	17.744
205651_x_at	RAPGEF4	4.82218e-09	9.96628e-12	up	17.7354
206377_at	FOXF2	7.24047e-07	9.11101e-09	up	17.7123
230746_s_at		3.91062e-06	8.12958e-08	down	-17.6826
213725_x_at	XYLT1	2.71701e-07	2.59402e-09	down	-17.5509
209619_at	CD74	1.55115e-05	4.96766e-07	down	-17.548
1555579_s_at	PTPRM	6.5256e-10	5.96763e-13	down	-17.5402
211958_at	IGFBP5	7.01019e-06	1.76425e-07	up	17.502
242715_at		5.76908e-08	3.03804e-10	up	17.4387
1568765_at	SERPINE1	1.78259e-06	2.95713e-08	down	-17.3948
238937_at	ZNF420	4.48622e-09	8.86166e-12	up	17.3558
47550_at	LZTS1	1.02029e-07	6.68061e-10	up	17.2309
213661_at	PAMR1	5.30293e-06	1.23177e-07	down	-17.1706
239710_at	FIGN	2.63843e-05	9.90708e-07	up	17.1334
200965_s_at	ABLIM1	1.02774e-06	1.44175e-08	up	17.0451
214164_x_at	CA12	7.97076e-09	2.01182e-11	down	-17.0142
235272_at	SBSN	1.18549e-08	3.4692e-11	down	-16.9001
232523_at	MEGF10	0.00120511	0.000141814	up	16.8961
221088_s_at	PPP1R9A	1.68352e-09	1.87828e-12	up	16.8566
1567224_at	HMGA2	2.82179e-05	1.0802e-06	down	-16.8523
205257_s_at	AMPH	1.01427e-06	1.40901e-08	down	-16.8513
210692_s_at	SLC43A3	2.67474e-07	2.51452e-09	down	-16.788
201540_at	FHL1	6.14925e-05	2.99055e-06	up	16.7599
209228_x_at	TUSC3	5.47075e-06	1.28276e-07	up	16.7569
1569020_at	NEDD9	2.70378e-07	2.57149e-09	up	16.744
203706_s_at	FZD7	8.99129e-06	2.4503e-07	up	16.7434
202450_s_at	CTSK	4.01247e-08	1.85671e-10	down	-16.6776
214933_at	CACNA1A	2.35839e-07	2.10928e-09	down	-16.619
201438_at	COL6A3	2.18315e-08	8.14563e-11	down	-16.6143
230249_at	KHDRBS3	8.62234e-08	5.31455e-10	up	16.5939
208306_x_at		3.08159e-07	3.00526e-09	down	-16.527
213425_at	WNT5A	3.41612e-08	1.47454e-10	down	-16.5108
201656_at	ITGA6	1.70365e-08	5.38183e-11	up	16.4548
226908_at	LRIG3	1.82326e-06	3.04126e-08	up	16.4266
219489_s_at	NXN	1.96653e-09	2.37386e-12	up	16.358
239082_at		5.78268e-08	3.0566e-10	up	16.3507
235843_at		8.0014e-06	2.1086e-07	down	-16.2929
215290_at		2.60702e-07	2.43244e-09	up	16.2795
213416_at	ITGA4	2.94927e-06	5.52364e-08	up	16.2754
225207_at	PDK4	0.000482348	4.3745e-05	up	16.2692
1553105_s_at	DSG2	2.175e-07	1.87971e-09	down	-16.2308
226134_s_at		6.01455e-07	7.11736e-09	up	16.1962
239893_at		0.00017476	1.17625e-05	down	-16.1882
203961_at	NEBL	1.64061e-07	1.27828e-09	up	16.1814
205001_s_at	DDX3Y	1.71452e-05	5.64451e-07	up	16.1623
213909_at	LRRC15	0.00130683	0.000157154	down	-16.1454
206811_at	ADCY8 /// LOC100134077	8.00535e-07	1.03773e-08	down	-16.092
203424_s_at	IGFBP5	3.54199e-07	3.59544e-09	up	16.0418
207426_s_at	TNFSF4	1.61543e-07	1.24684e-09	up	15.9522
204035_at	SCG2	1.43664e-05	4.49846e-07	up	15.9511
229523_at	TTMA	7.88281e-05	4.12343e-06	up	15.8789
202376_at	SERPINA3	3.11645e-06	5.97355e-08	up	15.8756
231227_at		1.78111e-05	5.94517e-07	down	-15.8751
228915_at	DACH1	1.26121e-06	1.87606e-08	up	15.8627
226188_at	HSPC159	1.29842e-07	9.1667e-10	up	15.8511
231514_at	C1orf94	2.05182e-08	7.3554e-11	down	-15.823
236344_at	PDE1C	0.00011835	7.03721e-06	up	15.8176
242181_at		3.0059e-05	1.18422e-06	up	15.8058
201981_at	PAPPA	0.000128783	7.88361e-06	down	-15.8049
204337_at	RGS4	6.76952e-09	1.60958e-11	up	15.7168
225237_s_at	MSI2	2.88752e-05	1.11466e-06	up	15.713
201137_s_at	HLA-DPB1	2.38083e-05	8.69159e-07	down	-15.6987
205846_at	PTPRB	2.07663e-07	1.76234e-09	up	15.6586
222557_at	STMN3	2.08622e-08	7.70532e-11	up	15.6528
226459_at	PIK3AP1	2.73141e-05	1.03419e-06	up	15.6314
227810_at	ZNF558	6.40318e-05	3.14332e-06	up	15.6013
212327_at	LIMCH1	5.38324e-08	2.77956e-10	up	15.593
227404_s_at	EGR1	0.000147488	9.41439e-06	down	-15.5917
235004_at	RBM24	0.00016996	1.12972e-05	up	15.5527
213558_at	PCLO	0.000169947	1.12925e-05	down	-15.5249
1553604_at	ABCA13	2.07663e-07	1.75477e-09	up	15.4532
204748_at	PTGS2	0.0080264	0.00159589	down	-15.4515
227654_at	FAM65C	5.87853e-07	6.91339e-09	down	-15.428
204670_x_at	HLA-DRB1 /// HLA-DRB4	1.37699e-07	9.99156e-10	down	-15.3887
218829_s_at	CHD7	1.63908e-05	5.33619e-07	up	15.3738
210997_at	HGF	3.85674e-05	1.62381e-06	down	-15.3564
204779_s_at	HOXB7	1.579e-05	5.08861e-07	up	15.3542
235798_at	TMEM170B	0.000546895	5.12636e-05	up	15.3483
222450_at	PMEPA1	1.13813e-05	3.29522e-07	up	15.277
212085_at	SLC25A6	1.31564e-05	4.00772e-07	up	15.2511
202411_at	IFI27	2.02923e-06	3.47761e-08	up	15.1774
230465_at	HS2ST1	7.59174e-08	4.48025e-10	up	15.152
209211_at	KLF5	3.27035e-05	1.31831e-06	up	15.1473
210042_s_at	CTSZ	6.01939e-07	7.13409e-09	up	15.1272
201069_at	MMP2	5.07981e-07	5.75107e-09	down	-15.0982
214603_at	MAGEA2 /// MAGEA2B	3.05019e-08	1.23848e-10	up	15.091
227812_at	TNFRSF19	5.61011e-07	6.49511e-09	up	15.0739
239579_at	EPHX4	1.02409e-08	2.82832e-11	up	15.0711
229380_at		5.81526e-05	2.78877e-06	up	15.0344
204410_at	EIF1AY	3.33296e-05	1.34781e-06	up	15.0259
213603_s_at	RAC2	3.80422e-07	3.91033e-09	down	-15.0253
202240_at	PLK1	3.92852e-08	1.81039e-10	down	-14.9975
204114_at	NID2	7.59174e-08	4.49878e-10	down	-14.9936
230964_at	FREM2	2.06559e-09	2.66886e-12	up	14.9749
201109_s_at	THBS1	6.26784e-07	7.53172e-09	up	14.949
242907_at		1.1628e-05	3.39911e-07	up	14.9392
204424_s_at	LMO3	1.22384e-07	8.57307e-10	up	14.9311
218729_at	LXN	2.08622e-08	7.70766e-11	down	-14.9151
230412_at	NPAS3	2.81992e-07	2.70774e-09	up	14.9142
204072_s_at	FRY	2.03065e-07	1.69731e-09	up	14.903
231950_at	ZNF658	9.94503e-08	6.36628e-10	up	14.8866
213413_at	STON1	1.81882e-05	6.08767e-07	up	14.8765
210052_s_at	TPX2	1.14465e-09	1.19332e-12	down	-14.8746
235099_at	CMTM8	3.39824e-08	1.46061e-10	up	14.8183
210222_s_at	RTN1	9.97694e-08	6.40801e-10	down	-14.8139
211776_s_at	EPB41L3	7.5337e-08	4.35418e-10	up	14.7324
224463_s_at	C11orf70	1.39155e-07	1.01708e-09	up	14.7174
206376_at	SLC6A15	1.13532e-05	3.2816e-07	down	-14.6833
227499_at		6.30524e-10	5.53547e-13	up	14.6537
217478_s_at	HLA-DMA	5.85481e-07	6.87479e-09	down	-14.6453
243481_at	RHOJ	3.96525e-07	4.11354e-09	up	14.5718
209891_at	SPC25	2.39354e-07	2.15824e-09	down	-14.5633
212624_s_at	CHN1	1.91098e-07	1.54136e-09	up	14.4411
205728_at		5.98915e-08	3.20955e-10	up	14.4252
243409_at	FOXL1	9.45681e-06	2.60311e-07	down	-14.4222
218319_at	PELI1	0.000256218	1.93774e-05	up	14.2971
214930_at	SLITRK5	1.02371e-07	6.72177e-10	down	-14.2825
229947_at	PI15	1.10363e-08	3.08835e-11	up	14.2746
230650_at		1.1628e-05	3.40068e-07	up	14.2545
220445_s_at	CSAG2 /// CSAG3	3.92852e-08	1.79791e-10	up	14.241
227506_at	SLC16A9	3.05397e-05	1.20986e-06	up	14.2339
226113_at	ZNF436	3.07676e-07	2.99104e-09	up	14.2217
209821_at	IL33	0.00102254	0.000114639	down	-14.2002
203066_at	GALNAC4S-6ST	0.000289616	2.27508e-05	up	14.1919
225645_at	EHF	3.36988e-05	1.36768e-06	up	14.1834
238964_at	FIGN	3.53796e-05	1.4456e-06	up	14.0558
211597_s_at	HOPX	0.000878078	9.38383e-05	up	14.0296
234640_x_at		5.47904e-06	1.28643e-07	up	14.0247
225927_at	MAP3K1	1.47072e-07	1.0948e-09	up	13.9935
222385_x_at	SEC61A1	4.40971e-05	1.93444e-06	down	-13.9731
236088_at	NTNG1	8.00792e-08	4.77473e-10	down	-13.933
209427_at	SMTN	1.90919e-06	3.22301e-08	down	-13.9283
206082_at	HCP5	7.91661e-07	1.01674e-08	up	13.9113
213869_x_at	THY1	3.93708e-06	8.23061e-08	up	13.9087
223519_at	ZAK	6.72106e-07	8.27302e-09	down	-13.9035
229407_at	SDK1	5.53006e-09	1.18339e-11	up	13.8843
228582_x_at		0.0260834	0.00741355	down	-13.8831
230130_at		1.8673e-05	6.30802e-07	up	13.8619
230493_at	SHISA2	2.98086e-09	4.74321e-12	up	13.8455
243366_s_at		1.87872e-07	1.51191e-09	up	13.83
219648_at	MREG	3.91062e-06	8.13519e-08	up	13.8264
1562415_a_at	SPOCD1	2.73564e-06	5.02346e-08	down	-13.8169
226192_at		0.00115579	0.000134213	up	13.7945
232068_s_at	TLR4	1.17497e-08	3.35244e-11	up	13.7526
213845_at	GRIK2	0.000384021	3.26672e-05	up	13.7414
220603_s_at	MCTP2	1.1913e-05	3.51234e-07	down	-13.7395
227997_at	IL17RD	4.96868e-05	2.26919e-06	up	13.7273
231384_at	GRIN2A	1.75955e-06	2.89316e-08	up	13.6611
202898_at	SDC3	2.14974e-09	2.94889e-12	up	13.6207
218084_x_at	FXYD5	3.69924e-07	3.77536e-09	down	-13.5958
204956_at	MTAP	1.7079e-08	5.46652e-11	up	13.5812
212022_s_at	MKI67	2.20433e-08	8.26497e-11	down	-13.5741
200636_s_at	PTPRF	8.0014e-06	2.10883e-07	up	13.5558
227688_at	LRCH2	5.68995e-05	2.70474e-06	up	13.5426
223655_at	CD163L1	6.02592e-07	7.16763e-09	down	-13.5348
228067_at	C2orf55	2.52465e-07	2.31856e-09	up	13.5109
228885_at	MAMDC2	1.45326e-06	2.25398e-08	up	13.5037
226114_at	ZNF436	1.68242e-07	1.32932e-09	up	13.4882
217865_at	RNF130	2.36205e-09	3.41292e-12	up	13.4376
201850_at	CAPG	3.85743e-06	7.95827e-08	down	-13.4169
242761_s_at	ZNF420	7.70842e-07	9.77034e-09	up	13.3819
213506_at	F2RL1	1.40046e-06	2.15415e-08	down	-13.3371
225294_s_at	TRAPPC1	9.20471e-07	1.23066e-08	down	-13.3126
202478_at	TRIB2	1.42522e-06	2.20267e-08	up	13.3086
217744_s_at	PERP	3.20808e-06	6.19613e-08	down	-13.2968
202421_at	IGSF3	5.20649e-05	2.3997e-06	up	13.2575
214761_at	ZNF423	2.96754e-05	1.15988e-06	up	13.2256
227486_at	NT5E	6.82994e-08	3.82252e-10	down	-13.2252
225016_at	APCDD1	1.78242e-05	5.95283e-07	up	13.1633
226591_at	SNRPN	3.90355e-06	8.08502e-08	up	13.1318
36499_at	CELSR2	2.58257e-09	3.87326e-12	up	13.1167
240292_x_at	ANKS1B	1.32705e-06	2.02182e-08	up	13.1141
227526_at	CDON	1.89425e-08	6.59093e-11	up	13.1039
243672_at	SALL3	1.99445e-07	1.64517e-09	up	13.0872
1569112_at	SLC44A5	3.23471e-08	1.36665e-10	up	13.0849
231880_at	FAM40B	2.00377e-07	1.66752e-09	down	-13.0754
209204_at	LMO4	1.55319e-05	4.9827e-07	up	13.032
227004_at		2.16554e-05	7.73535e-07	up	13.0153
235059_at	RAB12	2.58799e-05	9.67981e-07	up	13.008
218885_s_at	GALNT12	8.62234e-08	5.30804e-10	down	-12.9803
212657_s_at	IL1RN	1.0581e-05	2.98804e-07	down	-12.9472
226482_s_at	RP11-544M22.4	7.59174e-08	4.43936e-10	up	12.9341
208025_s_at	HMGA2	1.25412e-10	4.58754e-14	down	-12.8054
1553994_at	NT5E	3.78744e-06	7.79009e-08	down	-12.7904
1558501_at	DNM3	1.13833e-05	3.30204e-07	up	12.7767
226757_at	IFIT2	3.48174e-06	6.9603e-08	up	12.7762
230708_at	PRICKLE1	3.22296e-07	3.18907e-09	up	12.7524
216685_s_at	MTAP	7.06885e-07	8.83041e-09	up	12.7476
231597_x_at		0.00011297	6.60981e-06	up	12.722
228760_at	SFRS2B	2.45909e-05	9.06276e-07	up	12.721
228415_at	AP1S2	1.87784e-05	6.36079e-07	up	12.6938
203232_s_at	ATXN1	6.24488e-06	1.52025e-07	up	12.6932
244532_x_at		0.000507147	4.65609e-05	up	12.6856
229533_x_at	ZNF680	3.06946e-05	1.2188e-06	up	12.6743
219682_s_at	TBX3	0.00144186	0.000178456	up	12.6648
204457_s_at	GAS1	0.000214812	1.53974e-05	up	12.6333
238906_s_at	RHOJ	5.79357e-08	3.07295e-10	up	12.62
225102_at	MGLL	6.69151e-07	8.19992e-09	down	-12.6186
227297_at	ITGA9	2.20844e-07	1.9267e-09	up	12.6129
202086_at	MX1	8.09566e-05	4.26142e-06	up	12.5962
202935_s_at	SOX9	0.000645195	6.33689e-05	up	12.5932
1553830_s_at	MAGEA2 /// MAGEA2B	1.92298e-08	6.85838e-11	up	12.5824
212812_at		9.68997e-09	2.59887e-11	up	12.5557
226065_at	PRICKLE1	0.000265931	2.03523e-05	up	12.5528
228652_at	ZNF776	0.00109006	0.000124607	up	12.5344
206645_s_at	NR0B1	4.75232e-06	1.06737e-07	down	-12.4535
227070_at	GLT8D2	1.02029e-07	6.60902e-10	up	12.4535
222773_s_at	GALNT12	5.58052e-06	1.31716e-07	down	-12.4309
230815_at	LOC389765	3.28335e-05	1.32475e-06	up	12.4083
217767_at	C3	4.9992e-05	2.28587e-06	down	-12.4019
202036_s_at	SFRP1	1.6737e-07	1.31937e-09	up	12.3767
214719_at	SLC46A3	2.10799e-05	7.44218e-07	up	12.3704
228370_at	SNRPN	5.89731e-05	2.83459e-06	up	12.3653
209377_s_at	HMGN3	3.03172e-06	5.72853e-08	up	12.3552
225627_s_at	CACHD1	2.4266e-07	2.21467e-09	up	12.311
209839_at	DNM3	7.32505e-07	9.23084e-09	up	12.2361
220227_at	CDH4	1.19531e-06	1.73803e-08	up	12.2309
219434_at	TREM1	1.7252e-06	2.78936e-08	down	-12.2257
1555292_at	FAM40B	2.0909e-07	1.78592e-09	down	-12.2028
202035_s_at	SFRP1	6.57359e-09	1.5455e-11	up	12.1923
208146_s_at	CPVL	4.28412e-08	2.03726e-10	up	12.1636
231964_at		0.000237769	1.75691e-05	up	12.1193
219602_s_at	FAM38B	3.39824e-08	1.45483e-10	up	12.083
229744_at	SSFA2	4.42097e-06	9.60605e-08	up	12.0383
216452_at	TRPM3	2.29211e-07	2.03884e-09	up	12.0326
205278_at	GAD1	7.3328e-05	3.74184e-06	up	11.9905
212414_s_at	N-PAC /// SEPT6	1.00383e-06	1.37883e-08	up	11.9855
216973_s_at	HOXB7	4.41512e-06	9.5772e-08	up	11.9766
203509_at	SORL1	4.10444e-06	8.73997e-08	up	11.9569
1555229_a_at	C1S	0.00177421	0.000233187	down	-11.9357
240572_s_at	LOC374443	8.80511e-07	1.16274e-08	down	-11.9218
219574_at	2001-03-01	3.63737e-06	7.35938e-08	up	11.9218
214686_at	ZNF266	3.64971e-05	1.51062e-06	up	11.8665
227899_at	VIT	2.71019e-05	1.02261e-06	up	11.8241
213201_s_at	TNNT1	5.65602e-05	2.67592e-06	down	-11.8107
227838_at		3.18102e-05	1.27415e-06	up	11.8025
201058_s_at	MYL9	1.45283e-05	4.5757e-07	down	-11.7947
202150_s_at	NEDD9	1.28567e-05	3.88464e-07	up	11.7881
53991_at	DENND2A	1.91658e-07	1.5564e-09	up	11.7574
225915_at	CAB39L	7.65563e-06	1.97569e-07	up	11.742
201251_at	PKM2	6.17774e-08	3.34451e-10	down	-11.7038
212636_at	QKI	3.91062e-06	8.13952e-08	up	11.6986
229450_at	IFIT3	0.000290148	2.28192e-05	up	11.6986
218789_s_at	C11orf71	5.54646e-08	2.89116e-10	up	11.6966
202022_at	ALDOC	4.52017e-09	9.03885e-12	down	-11.689
243109_at	MCTP2	0.00262982	0.0003821	down	-11.6853
222680_s_at	DTL	2.30009e-08	8.75022e-11	down	-11.6803
229794_at	ZNF585A	2.57682e-07	2.3942e-09	up	11.6682
203373_at	SOCS2	1.99399e-05	6.90008e-07	up	11.6537
1561573_at		2.74673e-07	2.62742e-09	up	11.6532
228904_at	HOXB3	4.03615e-06	8.54623e-08	up	11.6407
244885_at		0.000672383	6.68386e-05	down	-11.6313
209771_x_at	CD24	0.00325381	0.000502875	up	11.6255
225548_at	SHROOM3	1.53727e-06	2.42645e-08	up	11.6239
228570_at	BTBD11	1.40963e-05	4.37521e-07	down	-11.6166
216563_at	ANKRD12	3.74411e-07	3.83485e-09	up	11.6023
227808_at	DNAJC15	6.10337e-07	7.28944e-09	down	-11.6015
226909_at	ZNF518B	6.26148e-07	7.51214e-09	up	11.5952
1555233_at	RHOJ	5.80913e-08	3.10246e-10	up	11.587
227155_at	LMO4	3.84839e-08	1.73855e-10	up	11.5749
231202_at	ALDH1L2	3.84065e-05	1.61494e-06	down	-11.5472
225055_at	LOC651250	0.000514881	4.75565e-05	up	11.5445
213113_s_at	SLC43A3	2.40193e-07	2.1702e-09	down	-11.536
214862_x_at		3.11203e-07	3.04515e-09	up	11.5357
1557302_at		8.8814e-08	5.52295e-10	up	11.5297
228974_at		5.71485e-06	1.3609e-07	up	11.5185
202286_s_at	TACSTD2	8.80395e-07	1.16098e-08	up	11.515
228365_at	CPNE8	7.80284e-06	2.03509e-07	down	-11.5091
227236_at	TSPAN2	1.11892e-07	7.59246e-10	up	11.5022
1557143_at	CSMD2	1.73491e-07	1.38031e-09	down	-11.4958
227231_at	KIAA1211	8.84831e-07	1.17168e-08	up	11.4902
208850_s_at	THY1	5.07981e-07	5.73981e-09	up	11.4856
209344_at	TPM4	1.07837e-05	3.07081e-07	down	-11.4616
210770_s_at	CACNA1A	0.000806809	8.42647e-05	down	-11.4594
212472_at	MICAL2	1.12194e-07	7.63347e-10	down	-11.4551
214591_at	KLHL4	3.63212e-08	1.58106e-10	up	11.4307
204596_s_at	STC1	0.00196924	0.000265339	down	-11.3931
214803_at		1.84223e-06	3.09312e-08	up	11.388
219670_at	BEND5	1.22043e-06	1.79911e-08	up	11.3455
1561180_at		0.000999891	0.000111248	down	-11.3397
239999_at	C21orf34	0.000277624	2.1593e-05	up	11.3367
242465_at		6.75307e-05	3.36551e-06	down	-11.3278
204702_s_at	NFE2L3	4.66282e-10	3.15545e-13	up	11.3211
213067_at	MYH10	7.13109e-07	8.93424e-09	up	11.315
219956_at	GALNT6	0.000535603	4.98916e-05	down	-11.3079
1554411_at	CTNNB1	8.0511e-06	2.12487e-07	up	11.2852
228400_at	SHROOM3	5.7979e-05	2.77302e-06	up	11.2639
214607_at	PAK3	1.70542e-06	2.75112e-08	up	11.2611
238320_at	NCRNA00084	0.00575667	0.00103731	down	-11.2175
206060_s_at	PTPN22	6.60303e-08	3.68345e-10	down	-11.2039
228033_at	E2F7	0.0170796	0.00423812	up	11.2038
1557359_at	LOC285758	2.09996e-07	1.7975e-09	up	11.1908
230003_at		4.05598e-05	1.72773e-06	down	-11.1857
231828_at	LOC253039	1.63755e-07	1.26991e-09	up	11.1778
205109_s_at	ARHGEF4	5.01327e-07	5.63907e-09	up	11.1141
204614_at	SERPINB2	6.7522e-06	1.67832e-07	down	-11.1131
228416_at	ACVR2A	1.22986e-05	3.65978e-07	up	11.0945
210299_s_at	FHL1	0.00030258	2.40839e-05	up	11.0706
201487_at	CTSC	4.04325e-06	8.57826e-08	up	11.0444
244359_s_at		0.00027968	2.1781e-05	up	11.0074
213386_at	C9orf125	2.22684e-07	1.95498e-09	down	-10.988
221916_at	NEFL	0.000160446	1.05056e-05	up	10.9828
222830_at	GRHL1	3.12948e-08	1.30502e-10	up	10.9718
236539_at	PTPN22	7.80481e-06	2.03846e-07	down	-10.9574
205542_at	STEAP1	2.55438e-07	2.364e-09	down	-10.95
209081_s_at	COL18A1	5.7678e-09	1.28376e-11	up	10.9397
206547_s_at	PPEF1	1.07865e-07	7.24035e-10	up	10.9246
242463_x_at	ZNF600	2.61595e-08	1.02868e-10	up	10.9145
229072_at		3.57954e-05	1.47175e-06	up	10.8893
221127_s_at	DKK3	0.000713926	7.22479e-05	up	10.889
224458_at	C9orf125	1.06336e-06	1.5002e-08	down	-10.8699
234996_at	CALCRL	5.38324e-08	2.77904e-10	up	10.8648
209774_x_at	CXCL2	0.00197347	0.000266125	down	-10.8628
1553613_s_at	FOXC1	0.000130863	8.04926e-06	up	10.8033
227361_at	HS3ST3B1	4.94865e-05	2.25605e-06	up	10.7922
230785_at		7.30127e-06	1.85876e-07	up	10.7865
229817_at	ZNF608	1.26121e-06	1.87769e-08	up	10.7434
238646_at		1.70845e-06	2.75914e-08	up	10.7382
228450_at	PLEKHA7	1.17625e-06	1.69027e-08	up	10.7344
214077_x_at	MEIS3P1	0.000626814	6.11165e-05	up	10.7015
206298_at	ARHGAP22	5.14234e-06	1.18695e-07	down	-10.6771
209737_at	MAGI2	9.01095e-06	2.45731e-07	up	10.6456
227062_at	NCRNA00084	0.00135376	0.000164581	down	-10.5922
213395_at	MLC1	2.05058e-06	3.51796e-08	up	10.5846
209581_at	PLA2G16	0.000328593	2.67542e-05	up	10.5638
219902_at	BHMT2	5.35622e-06	1.24905e-07	down	-10.5596
215767_at	ZNF804A	2.41779e-06	4.30271e-08	down	-10.5591
200831_s_at	SCD	6.34132e-06	1.55532e-07	down	-10.5392
207156_at	HIST1H2AG	1.77004e-06	2.92659e-08	up	10.5228
221586_s_at	E2F5	0.000104745	5.96383e-06	up	10.5133
229021_at	MCTP2	1.77518e-05	5.90265e-07	down	-10.5023
204967_at	SHROOM2	3.8353e-05	1.61128e-06	up	10.4997
206189_at	UNC5C	3.78532e-08	1.69621e-10	up	10.4761
212158_at	SDC2	5.57779e-05	2.62286e-06	up	10.4347
204062_s_at	ULK2	8.05127e-08	4.84475e-10	up	10.4335
223557_s_at	TMEFF2	3.20488e-06	6.17899e-08	down	-10.4306
226676_at	ZNF521	6.6262e-06	1.63973e-07	down	-10.3897
266_s_at	CD24	0.00132337	0.000159627	up	10.3853
227749_at		9.09965e-06	2.48482e-07	down	-10.3798
215306_at		3.53347e-07	3.58033e-09	up	10.3599
203329_at	PTPRM	3.34811e-07	3.37414e-09	down	-10.3578
203662_s_at	TMOD1	1.09261e-05	3.13544e-07	up	10.3482
204629_at	PARVB	1.61081e-05	5.21468e-07	down	-10.3464
201236_s_at	BTG2	7.91466e-07	1.01331e-08	up	10.3451
230543_at		0.0140708	0.00330287	down	-10.3301
229580_at		6.99698e-06	1.75964e-07	up	10.3186
205808_at	ASPH	0.000408388	3.53003e-05	down	-10.3178
210839_s_at	ENPP2	0.000151014	9.70303e-06	down	-10.3116
212325_at	LIMCH1	1.66613e-06	2.67556e-08	up	10.3054
205174_s_at	QPCT	0.000138339	8.65074e-06	down	-10.2886
203418_at	CCNA2	5.01252e-07	5.62906e-09	down	-10.2764
204455_at	DST	4.64236e-06	1.03163e-07	up	10.2751
230788_at	GCNT2	5.57982e-05	2.62484e-06	up	10.2749
219918_s_at	ASPM	1.00179e-06	1.37237e-08	down	-10.2502
212242_at	TUBA4A	1.52886e-07	1.16045e-09	down	-10.2482
220122_at	MCTP1	7.78299e-06	2.02784e-07	down	-10.2171
231166_at	GPR155	0.0021334	0.000293896	up	10.2158
221911_at	ETV1	3.13082e-07	3.07547e-09	down	-10.206
206700_s_at	KDM5D	1.56332e-06	2.47043e-08	up	10.2017
206624_at	USP9Y	2.81249e-08	1.11625e-10	up	10.1818
202704_at	TOB1	0.00251037	0.00036052	up	10.1749
238493_at	ZNF506	3.74912e-07	3.84684e-09	up	10.168
1552782_at	SLC44A5	7.38594e-09	1.81018e-11	up	10.167
1555730_a_at	CFL1	1.91658e-07	1.55397e-09	down	-10.1464
243546_at		4.82826e-06	1.08973e-07	up	10.1419
232748_at	PAPPA	0.000517041	4.77938e-05	down	-10.1333
228868_x_at	CDT1	3.23226e-05	1.30059e-06	down	-10.1179
219213_at	JAM2	6.98371e-09	1.68605e-11	down	-10.1003
244461_at	CYTSB	3.09603e-08	1.27975e-10	up	10.0691
220316_at	NPAS3	1.40684e-07	1.03181e-09	up	10.0629
1555882_at	SPIN3	1.31963e-05	4.02829e-07	up	10.0591
227803_at	ENPP5	1.6468e-05	5.37338e-07	up	10.0404
207442_at	CSF3	0.000536212	4.9968e-05	down	-10.0375
210657_s_at	2004-09-01	2.0909e-07	1.7834e-09	up	10.0281
224391_s_at	SIAE	2.69557e-07	2.55595e-09	up	10.0153
206363_at	MAF	8.79227e-06	2.38481e-07	up	10.0086
222820_at	TNRC6C	1.31903e-06	2.00719e-08	up	10.0064
238819_at	ZNF347	5.00343e-09	1.05239e-11	up	9.99312
212558_at	SPRY1	5.57711e-07	6.43649e-09	up	9.98534
1564837_at	LOC151760	0.000379784	3.22032e-05	down	-9.98212
225328_at		1.62894e-05	5.2972e-07	up	9.97115
224252_s_at	FXYD5	8.0819e-07	1.0495e-08	down	-9.96583
225240_s_at	MSI2	1.00795e-05	2.81322e-07	up	9.95569
221898_at	PDPN	1.48568e-06	2.32601e-08	down	-9.949
1569971_at		0.00395563	0.000641364	down	-9.94296
221885_at	DENND2A	7.63376e-06	1.96793e-07	up	9.93319
209763_at	CHRDL1	0.0048956	0.000844183	up	9.92909
228082_at	ASAM	2.06747e-07	1.73892e-09	down	-9.91032
219528_s_at	BCL11B	0.000969809	0.000106623	down	-9.90597
214825_at	FAM155A	1.76607e-06	2.90906e-08	down	-9.90483
206465_at	ACSBG1	7.21389e-06	1.82501e-07	up	9.90159
236278_at		8.33221e-08	5.04288e-10	up	9.88717
228367_at	ALPK2	1.44079e-05	4.51935e-07	up	9.88664
216379_x_at	CD24	0.00166614	0.000214899	up	9.8841
202946_s_at	BTBD3	0.000191089	1.31971e-05	up	9.88026
215071_s_at	HIST1H2AC	2.11551e-06	3.6491e-08	up	9.87804
227210_at		7.05394e-07	8.79888e-09	up	9.87607
227603_at		1.23567e-05	3.68383e-07	up	9.86548
218536_at	MRS2	0.000409638	3.54533e-05	up	9.86409
210944_s_at	CAPN3	1.96729e-06	3.34395e-08	up	9.85954
217080_s_at	HOMER2	4.8383e-06	1.09465e-07	down	-9.85891
226039_at	MGAT4A	1.08753e-06	1.54551e-08	up	9.85044
204879_at	PDPN	2.41622e-06	4.2955e-08	down	-9.8456
210613_s_at	SYNGR1	5.66101e-06	1.34418e-07	up	9.84416
205514_at	ZNF415	1.90583e-05	6.49393e-07	up	9.8416
235417_at	SPOCD1	6.44888e-06	1.58406e-07	down	-9.84119
226614_s_at	FAM167A	3.08159e-07	3.00973e-09	down	-9.82614
222725_s_at	PALMD	0.000172741	1.1567e-05	down	-9.82594
210815_s_at	CALCRL	1.8534e-05	6.25428e-07	up	9.82524
204454_at	LDOC1	0.00223288	0.000311807	up	9.82332
229271_x_at	COL11A1	9.88094e-09	2.69275e-11	up	9.8214
1554574_a_at	CYB5R3	0.000171212	1.13953e-05	down	-9.79584
200906_s_at	PALLD	0.000260535	1.97997e-05	up	9.77304
203435_s_at	MME	3.68627e-08	1.62486e-10	down	-9.76594
205083_at	AOX1	1.59761e-05	5.16611e-07	down	-9.7536
204070_at	RARRES3	0.000100919	5.68134e-06	up	9.75292
211981_at	COL4A1	4.4426e-05	1.95255e-06	up	9.75059
207084_at	POU3F2	1.29838e-05	3.9373e-07	up	9.73443
227124_at	LOC221710	1.10719e-06	1.57548e-08	up	9.70474
214007_s_at	TWF1	0.00198292	0.000267799	down	-9.69721
243296_at	NAMPT	0.000575291	5.46513e-05	down	-9.67664
204823_at	NAV3	6.75399e-07	8.32591e-09	down	-9.67479
206331_at	CALCRL	1.13532e-05	3.2825e-07	up	9.67357
219312_s_at	ZBTB10	4.18437e-05	1.79926e-06	up	9.65887
244114_x_at		0.000613473	5.94791e-05	up	9.65509
225301_s_at	MYO5B	1.19531e-06	1.73691e-08	up	9.6357
237802_at	XKR4	3.87502e-06	8.00874e-08	up	9.63038
201631_s_at	IER3	0.00016927	1.1232e-05	down	-9.62976
238868_at	UACA	1.8376e-06	3.07525e-08	up	9.59132
223796_at	CNTNAP3 /// LOC643827	1.8376e-06	3.07527e-08	up	9.58964
213059_at	CREB3L1	8.11379e-07	1.05958e-08	down	-9.58853
217053_x_at	ETV1	3.65102e-05	1.51183e-06	down	-9.58278
211964_at	COL4A2	6.25995e-06	1.5262e-07	up	9.57087
210198_s_at	PLP1	3.96312e-05	1.67875e-06	up	9.56801
218574_s_at	LMCD1	2.921e-07	2.81548e-09	up	9.56217
238718_at		8.79826e-08	5.45516e-10	up	9.5594
208885_at	LCP1	0.000674189	6.71414e-05	down	-9.55228
204995_at	CDK5R1	9.77227e-06	2.71497e-07	up	9.53608
203764_at	DLGAP5	1.66834e-05	5.46808e-07	down	-9.53515
228831_s_at	GNG7	3.88046e-05	1.63522e-06	up	9.5144
205347_s_at	TMSB15A	0.000157537	1.02662e-05	down	-9.48864
205302_at	IGFBP1	7.78299e-06	2.02574e-07	down	-9.48826
227180_at	ELOVL7	0.000207187	1.46916e-05	down	-9.48156
228600_x_at	C7orf46	0.000398991	3.43384e-05	up	9.48005
203851_at	IGFBP6	2.91355e-05	1.13078e-06	down	-9.47114
209960_at	HGF	6.42409e-06	1.57679e-07	down	-9.47064
1553696_s_at	ZNF569	1.382e-07	1.00601e-09	up	9.47022
200974_at	ACTA2	6.52412e-07	7.94393e-09	down	-9.46096
206525_at	GABRR1	3.5138e-07	3.55025e-09	up	9.45682
222449_at	PMEPA1	1.45502e-07	1.07834e-09	up	9.42695
205442_at	MFAP3L	9.51112e-05	5.28308e-06	up	9.41967
217551_at	LOC441453	4.43919e-08	2.14862e-10	up	9.41221
220945_x_at	MANSC1	4.58428e-05	2.03578e-06	up	9.40391
230930_at	LOC338620	1.16077e-05	3.3905e-07	down	-9.39812
213152_s_at	SFRS2B	5.04087e-05	2.31138e-06	up	9.39324
244362_at		1.1465e-07	7.86352e-10	up	9.38764
210650_s_at	PCLO	0.00263112	0.000382433	down	-9.3854
203323_at	CAV2	1.44257e-06	2.23476e-08	up	9.36264
210762_s_at	DLC1	8.20133e-05	4.3523e-06	down	-9.35838
213789_at		0.000554363	5.21867e-05	down	-9.34021
203837_at	MAP3K5	0.000516865	4.7768e-05	up	9.33594
207148_x_at	MYOZ2	0.000646738	6.35678e-05	down	-9.33414
241780_at		3.81351e-07	3.92685e-09	up	9.31475
209773_s_at	RRM2	5.76908e-08	3.02701e-10	down	-9.28888
226218_at	IL7R	3.73854e-06	7.6534e-08	up	9.28511
210073_at	ST8SIA1	0.000148315	9.48348e-06	up	9.28064
1555920_at	CBX3	6.23067e-05	3.04269e-06	up	9.2401
223268_at	C11orf54	0.00245292	0.000350429	up	9.23582
205366_s_at	HOXB6	7.7859e-07	9.92551e-09	up	9.20256
225511_at	GPRC5B	7.23345e-07	9.08895e-09	up	9.19511
202765_s_at	FBN1	0.00128201	0.000153372	down	-9.18143
225855_at	EPB41L5	1.30791e-07	9.28156e-10	up	9.17197
209205_s_at	LMO4	3.56454e-05	1.46102e-06	up	9.15975
204971_at	CSTA	0.00236278	0.000334441	down	-9.15766
230508_at	DKK3	0.000272875	2.10864e-05	up	9.15493
1558945_s_at	CACNA1A	2.10799e-05	7.45272e-07	down	-9.15077
228098_s_at	MYLIP	7.0431e-05	3.55021e-06	up	9.12551
226677_at	ZNF521	0.000308306	2.46588e-05	down	-9.12164
213572_s_at	SERPINB1	6.8922e-05	3.45776e-06	down	-9.12035
228562_at		0.000318996	2.57472e-05	up	9.1174
217177_s_at	PTPRB	2.18315e-08	8.11179e-11	up	9.10058
204236_at	FLI1	4.89437e-06	1.1127e-07	up	9.09646
227148_at	PLEKHH2	0.000105252	6.00425e-06	up	9.08455
219603_s_at	ZNF226	0.00319741	0.000491117	up	9.08272
201641_at	BST2	0.000501522	4.59648e-05	up	9.07195
214475_x_at	CAPN3	4.75015e-06	1.06565e-07	up	9.06938
239340_at		1.77253e-08	5.83549e-11	up	9.06805
223168_at	RHOU	4.44987e-07	4.82629e-09	up	9.0631
227123_at	RAB3B	0.00163271	0.000209065	down	-9.05538
207981_s_at	ESRRG	4.25587e-06	9.16948e-08	up	9.04076
213640_s_at	LOX	0.00375376	0.000599984	down	-9.03977
208747_s_at	C1S	2.4218e-06	4.31427e-08	down	-9.0266
215081_at	KIAA1024	1.79471e-05	5.99715e-07	up	9.01531
228343_at	POU2F2	0.00383734	0.000616571	down	-9.01451
244353_s_at	SLC2A12	4.81108e-07	5.31485e-09	up	9.01031
219683_at	FZD3	2.1115e-05	7.48824e-07	up	9.00968
207018_s_at	RAB27B	7.93396e-05	4.15744e-06	down	-9.00833
226433_at	RNF157	7.4119e-08	4.25667e-10	up	8.99581
206272_at	RAB4A /// SPHAR	3.45891e-06	6.88301e-08	up	8.97956
238133_at		0.000159248	1.04039e-05	down	-8.97797
218858_at	DEPDC6	1.07796e-06	1.526e-08	up	8.97045
232060_at	ROR1	9.43706e-07	1.27381e-08	up	8.96887
223130_s_at	MYLIP	4.59103e-06	1.01863e-07	up	8.962
227396_at	PTPRJ	2.29424e-05	8.30415e-07	up	8.96091
228900_at	CYTSB	9.29454e-07	1.25117e-08	up	8.9479
242321_at		0.00413808	0.000679727	down	-8.94519
203854_at	CFI	5.70997e-07	6.67338e-09	up	8.94423
203903_s_at	HEPH	1.61076e-08	4.94939e-11	up	8.93025
207417_s_at	ZNF177	1.37699e-07	9.99843e-10	up	8.92288
227081_at	DNALI1	0.00217265	0.000300654	up	8.90075
211363_s_at	MTAP	4.35555e-07	4.65875e-09	up	8.89632
224851_at	CDK6	0.000289994	2.27994e-05	up	8.89351
239482_x_at	ZNF708	7.43858e-06	1.90199e-07	up	8.86867
235079_at		6.02592e-07	7.1531e-09	up	8.86506
217584_at		1.08656e-06	1.54016e-08	down	-8.86469
230360_at	GLDN	2.4467e-05	8.9992e-07	up	8.84965
201461_s_at	MAPKAPK2	9.07867e-05	4.94159e-06	down	-8.8462
226363_at	ABCC5	5.62215e-07	6.56046e-09	up	8.83875
230560_at	STXBP6	0.000293949	2.32041e-05	down	-8.83703
229720_at	BAG1	1.08713e-06	1.54296e-08	up	8.83249
235698_at	ZFP90	0.0010439	0.00011765	up	8.82037
218490_s_at	ZNF302	3.87014e-06	7.99157e-08	up	8.8077
212021_s_at	MKI67	1.18741e-06	1.71134e-08	down	-8.80425
204729_s_at	STX1A	2.39354e-07	2.15123e-09	down	-8.80288
236128_at	ZNF91	4.86385e-07	5.39094e-09	up	8.79959
242028_at	ZNF709	2.07663e-07	1.76196e-09	up	8.78359
219163_at	ZNF562	2.89503e-05	1.1183e-06	up	8.77757
235127_at	PMP2	0.000144136	9.13716e-06	up	8.77479
204501_at	NOV	2.1326e-05	7.57479e-07	down	-8.76304
1554712_a_at	GLYATL2	2.38328e-06	4.22119e-08	up	8.7607
205532_s_at	CDH6	7.53674e-09	1.86092e-11	up	8.75616
210145_at	PLA2G4A	0.00151539	0.000190355	down	-8.75328
201982_s_at	PAPPA	4.54307e-05	2.01166e-06	down	-8.7442
202625_at	LYN	1.68549e-05	5.53044e-07	up	8.72462
204249_s_at	LMO2	0.0137894	0.00321879	up	8.72073
201331_s_at	STAT6	1.43497e-06	2.22037e-08	down	-8.69426
225299_at	MYO5B	5.51566e-06	1.29733e-07	up	8.69061
203665_at	HMOX1	3.68266e-06	7.49666e-08	down	-8.68281
222895_s_at	BCL11B	0.0125052	0.00282212	down	-8.6726
236038_at		4.80769e-05	2.17105e-06	up	8.67229
235408_x_at	ZNF117	6.07276e-05	2.93867e-06	up	8.66664
223588_at	THAP2	4.59103e-06	1.01939e-07	up	8.66405
230090_at	GDNF	5.19234e-05	2.39223e-06	down	-8.65716
212731_at	ANKRD46	0.000117481	6.97183e-06	up	8.65552
224932_at	CHCHD10	7.71672e-06	1.99832e-07	down	-8.65526
242286_at	GRIN2A	4.92603e-07	5.47787e-09	up	8.64825
212554_at	CAP2	0.000156086	1.01374e-05	up	8.62059
220658_s_at	ARNTL2	1.08569e-05	3.10567e-07	down	-8.61987
231726_at	PCDHB14	0.000362421	3.03592e-05	up	8.61662
201983_s_at	EGFR	1.9098e-06	3.22946e-08	down	-8.61524
229308_at		2.75487e-05	1.04552e-06	down	-8.60757
229127_at	JAM2	2.45406e-06	4.37624e-08	down	-8.60624
232662_x_at	C10orf58	1.064e-07	7.08361e-10	down	-8.60588
243790_at	ZNF585A	1.0588e-05	2.99338e-07	up	8.59585
242270_at		6.58503e-07	8.04536e-09	up	8.59514
228658_at	MIAT	0.000107452	6.18562e-06	up	8.58746
211700_s_at	TRO	3.00636e-06	5.65806e-08	up	8.58595
227434_at	WBSCR17	7.92684e-06	2.07923e-07	up	8.58342
205100_at	GFPT2	6.21194e-09	1.4202e-11	down	-8.58069
236694_at	CYorf15A	1.02226e-06	1.42471e-08	up	8.57666
222223_s_at	IL1F5	2.49699e-05	9.26305e-07	down	-8.56557
204463_s_at	EDNRA	0.00191765	0.000256949	down	-8.5551
228328_at	KLHL28	0.00129366	0.000155145	up	8.54634
214175_x_at	PDLIM4	1.15865e-06	1.65723e-08	up	8.5442
206280_at	CDH18	0.000112086	6.53142e-06	down	-8.5276
212713_at	MFAP4	4.55851e-05	2.021e-06	down	-8.5265
203910_at	ARHGAP29	0.00325518	0.000503253	up	8.52414
224847_at	CDK6	3.31356e-06	6.46046e-08	up	8.51467
208370_s_at	RCAN1	0.0191564	0.0049374	up	8.51269
212062_at	ATP9A	4.11156e-05	1.76043e-06	up	8.50522
216247_at	RPS20	1.65185e-06	2.64054e-08	up	8.50212
225056_at	SIPA1L2	1.14062e-05	3.31077e-07	up	8.48641
238030_at		5.45807e-07	6.27916e-09	up	8.47236
242056_at	TRIM45	6.98981e-06	1.75656e-07	up	8.47223
236302_at	PPM1E	9.45373e-05	5.22873e-06	up	8.46838
235556_at		0.000232152	1.70308e-05	up	8.4516
223468_s_at	RGMA	3.5138e-07	3.55397e-09	up	8.44519
205884_at	ITGA4	1.02457e-06	1.43355e-08	up	8.44312
37966_at	PARVB	2.1919e-05	7.85356e-07	down	-8.44008
1560208_at		4.75948e-06	1.07072e-07	down	-8.43778
236453_at	RPL7AP45	3.55741e-07	3.61759e-09	up	8.42944
203820_s_at	IGF2BP3	1.26526e-05	3.80214e-07	down	-8.42765
221658_s_at	IL21R	0.000139061	8.72712e-06	down	-8.42483
1555564_a_at	CFI	8.38925e-06	2.23867e-07	up	8.41701
238856_s_at	PANK2	2.54881e-05	9.50063e-07	up	8.40831
206028_s_at	MERTK	1.82677e-06	3.05047e-08	up	8.39193
210125_s_at	BANF1	2.47116e-07	2.26439e-09	down	-8.38793
216604_s_at	SLC7A8	0.00066934	6.64749e-05	down	-8.37509
230276_at	FAM49A	1.12386e-07	7.66709e-10	down	-8.36737
202437_s_at	CYP1B1	2.12163e-05	7.52805e-07	down	-8.36549
229455_at		3.96525e-07	4.13386e-09	up	8.34345
226158_at	KLHL24	0.00028445	2.22409e-05	up	8.32643
229490_s_at		0.000116646	6.87822e-06	down	-8.32388
228772_at	HNMT	0.000127852	7.80326e-06	up	8.3099
213954_at	FAM169A	3.39984e-05	1.38232e-06	up	8.30749
204589_at	NUAK1	0.000133192	8.2277e-06	up	8.30629
225911_at	NPNT	7.07256e-08	4.02298e-10	up	8.30621
235435_at	AASDH	3.69626e-05	1.53462e-06	up	8.30013
1568603_at	CADPS	0.000127342	7.76044e-06	down	-8.29531
204547_at	RAB40B	1.46571e-05	4.63236e-07	up	8.29074
226747_at	TXNDC16	1.05556e-05	2.96993e-07	up	8.28818
210935_s_at	WDR1	0.000331922	2.71183e-05	down	-8.28799
204237_at	GULP1	0.00138935	0.000170178	up	8.28374
228390_at		0.000340316	2.79473e-05	up	8.2834
225606_at	BCL2L11	4.44339e-07	4.803e-09	up	8.2768
204318_s_at	GTSE1	0.000793626	8.26068e-05	down	-8.24372
204075_s_at	KIAA0562	8.12258e-05	4.28302e-06	up	8.24023
242481_at		1.85619e-08	6.41646e-11	up	8.22599
216237_s_at	MCM5	0.00021579	1.54832e-05	down	-8.21534
211756_at	PTHLH	2.40043e-05	8.78513e-07	up	8.21277
244293_at	UQCRB	6.9642e-06	1.7463e-07	up	8.21273
231837_at	USP28	1.21016e-06	1.78177e-08	up	8.20831
226186_at	TMOD2	5.61583e-07	6.54281e-09	up	8.20108
205475_at	SCRG1	4.43434e-05	1.9473e-06	up	8.19593
201508_at	IGFBP4	4.40971e-05	1.93096e-06	down	-8.19243
1561956_at		5.11546e-06	1.177e-07	up	8.17388
222062_at	IL27RA	6.82072e-07	8.47055e-09	up	8.17253
1555907_at	hCG_2014417	1.2789e-06	1.9087e-08	down	-8.17223
235292_at	FLJ32255	0.000505845	4.64e-05	down	-8.1668
1554250_s_at	TRIM73	0.000120647	7.24652e-06	up	8.16546
203581_at	RAB4A	8.00535e-07	1.03696e-08	up	8.15736
205098_at	CCR1	8.09388e-07	1.05402e-08	down	-8.13991
224818_at	SORT1	1.72762e-06	2.80564e-08	up	8.12387
204339_s_at	RGS4	1.06172e-07	7.04904e-10	up	8.12115
1555167_s_at	NAMPT	0.0104794	0.00225119	down	-8.11632
212473_s_at	MICAL2	2.32292e-08	8.92205e-11	down	-8.11368
205427_at	ZNF354A	1.13833e-05	3.30166e-07	up	8.11288
239291_at		3.51443e-06	7.05137e-08	up	8.11208
212978_at	LRRC8B	7.77883e-05	4.0453e-06	up	8.10426
218859_s_at	ESF1	3.66338e-05	1.51894e-06	up	8.10266
239884_at	CADPS	0.000127946	7.8113e-06	down	-8.10263
218589_at	P2RY5	3.59842e-06	7.26594e-08	up	8.09775
205131_x_at	CLEC11A	0.00012568	7.62932e-06	down	-8.08649
226571_s_at	PTPRS	4.02657e-07	4.21459e-09	up	8.0812
229975_at	BMPR1B	4.59861e-05	2.04383e-06	up	8.06731
207394_at	ZNF137	1.37464e-09	1.50852e-12	up	8.05495
219871_at	FLJ13197	1.20571e-07	8.35782e-10	up	8.05335
200707_at	PRKCSH	6.71281e-07	8.25059e-09	down	-8.03745
229024_at		1.67392e-06	2.69419e-08	up	8.03471
225897_at	MARCKS	2.67292e-06	4.86919e-08	up	8.03037
203258_at	DRAP1	1.07865e-07	7.22171e-10	down	-8.02612
209989_at	ZNF268	1.89838e-05	6.44773e-07	up	8.02023
226259_at	EXOC6	5.79551e-05	2.76976e-06	up	8.01569
225871_at	STEAP2	3.02817e-05	1.19576e-06	down	-8.01344
218115_at	ASF1B	6.92767e-06	1.73244e-07	down	-7.99985
218726_at	HJURP	1.27487e-07	8.95384e-10	down	-7.99527
228937_at	C13orf31	0.000296175	2.34394e-05	down	-7.99057
1555786_s_at	C14orf34	3.46507e-05	1.41392e-06	down	-7.98628
230729_at		1.47463e-06	2.30062e-08	up	7.9632
205079_s_at	MPDZ	3.73854e-06	7.65828e-08	up	7.96095
225242_s_at	CCDC80	1.6566e-05	5.41445e-07	down	-7.96038
223700_at	MND1	4.28257e-05	1.85715e-06	down	-7.95708
237299_at		3.6798e-09	6.52841e-12	up	7.94911
220651_s_at	MCM10	0.000506024	4.6433e-05	down	-7.94646
230902_at	LOC645323	9.39605e-05	5.18069e-06	up	7.94606
206561_s_at	AKR1B10	0.000774808	8.00073e-05	down	-7.9452
235457_at	MAML2	0.000159494	1.04258e-05	up	7.9429
202479_s_at	TRIB2	6.96932e-06	1.74886e-07	up	7.92945
218211_s_at	MLPH	1.45502e-07	1.0784e-09	down	-7.91946
231728_at	CAPS	3.16621e-05	1.26707e-06	up	7.91529
209994_s_at	ABCB1 /// ABCB4	1.81075e-06	3.01194e-08	up	7.8979
210807_s_at	SLC16A7	0.000382485	3.24946e-05	down	-7.89359
226250_at		6.25995e-06	1.5257e-07	up	7.89134
208711_s_at	CCND1	0.000566415	5.36528e-05	down	-7.89035
218976_at	DNAJC12	0.000319255	2.57856e-05	up	7.88703
219492_at	CHIC2	5.03047e-06	1.15376e-07	up	7.88053
209598_at	PNMA2	0.0341494	0.0106205	up	7.87013
242940_x_at	DLX6	3.67671e-06	7.47783e-08	up	7.82576
218918_at	MAN1C1	7.7859e-07	9.91761e-09	up	7.81927
222344_at		0.000207907	1.47617e-05	up	7.8146
210023_s_at	PCGF1	1.22373e-06	1.80622e-08	down	-7.81444
211162_x_at	SCD	0.0033323	0.000517322	down	-7.80781
233899_x_at	ZBTB10	2.85032e-05	1.09582e-06	up	7.80746
225540_at	MAP2	0.000343294	2.82546e-05	up	7.8065
228438_at	LOC100132891	0.000190698	1.3153e-05	down	-7.79884
204137_at	GPR137B	2.5412e-05	9.45833e-07	up	7.79105
225726_s_at	PLEKHH1	8.4298e-06	2.25257e-07	up	7.78679
238481_at	MGP	4.28952e-09	8.15938e-12	up	7.7828
208950_s_at	ALDH7A1	0.000179194	1.21593e-05	up	7.77735
227897_at		2.15464e-05	7.68853e-07	down	-7.77547
205471_s_at	DACH1	0.000221339	1.59906e-05	up	7.77115
204029_at	CELSR2	8.1019e-07	1.05654e-08	up	7.76675
221523_s_at	RRAGD	0.00176587	0.000231994	up	7.76632
223220_s_at	PARP9	1.7507e-06	2.86603e-08	up	7.75439
218883_s_at	MLF1IP	2.48499e-06	4.45412e-08	down	-7.74511
200808_s_at	ZYX	6.0343e-06	1.45905e-07	down	-7.7433
208835_s_at	CROP	6.90853e-06	1.72603e-07	up	7.72636
242828_at	FIGN	0.000708699	7.14986e-05	up	7.72428
215706_x_at	ZYX	8.18197e-06	2.16598e-07	down	-7.71718
230968_at		1.61667e-06	2.56361e-08	up	7.70788
213117_at	KLHL9	1.45994e-05	4.60344e-07	up	7.69661
232278_s_at	DEPDC1	1.75155e-05	5.79525e-07	down	-7.68645
223217_s_at	NFKBIZ	4.41425e-06	9.56724e-08	down	-7.68102
228751_at	CLK4	0.00101891	0.00011407	up	7.67285
225224_at	C20orf112	0.000480182	4.3482e-05	up	7.67108
1556200_a_at	C10orf90	3.75205e-05	1.56355e-06	down	-7.66798
219506_at	C1orf54	1.52829e-07	1.15722e-09	down	-7.66494
1554447_at	LOC554203	0.000292346	2.30187e-05	up	7.66355
244462_at	ZNF224	3.82258e-05	1.60248e-06	up	7.66156
220494_s_at		0.000247132	1.84733e-05	down	-7.65792
233516_s_at	SPAG17	2.73832e-06	5.0334e-08	up	7.65543
217061_s_at	ETV1	0.000176189	1.18948e-05	down	-7.6464
204653_at	TFAP2A	0.000118945	7.09864e-06	up	7.64425
228719_at	ZSWIM7	3.15962e-07	3.11483e-09	up	7.64017
242899_at		3.92852e-08	1.81068e-10	up	7.63768
228143_at	CP	5.80913e-08	3.09866e-10	up	7.63744
222572_at	PPM2C	1.05638e-05	2.97965e-07	up	7.63459
230300_at		0.000202174	1.42141e-05	up	7.63326
238681_at	GDPD1	0.0117627	0.00260835	up	7.626
228393_s_at	ZNF302	0.000332235	2.715e-05	up	7.61683
227689_at	ZNF227	0.000966026	0.000106029	up	7.60679
205885_s_at	ITGA4	4.50032e-06	9.92664e-08	up	7.5993
200644_at	MARCKSL1	0.000163619	1.07738e-05	up	7.59641
213510_x_at	LOC220594	8.14392e-05	4.31065e-06	up	7.59339
202082_s_at	SEC14L1	0.000319166	2.57713e-05	up	7.59075
205348_s_at	DYNC1I1	0.000305458	2.43764e-05	up	7.58133
1564220_a_at		0.00142737	0.000176088	down	-7.58095
219155_at	PITPNC1	2.60702e-07	2.43656e-09	down	-7.57892
227440_at	ANKS1B	2.89594e-05	1.12036e-06	up	7.57431
225594_at	CREBZF	9.04549e-05	4.91345e-06	up	7.5727
224826_at	RP5-1022P6.2	5.65602e-05	2.67701e-06	up	7.56829
210783_x_at	CLEC11A	0.000954207	0.000104435	down	-7.5523
232397_at		0.000227929	1.66001e-05	down	-7.55198
239033_at		3.10866e-05	1.23891e-06	up	7.54718
227870_at	IGDCC4	0.00145098	0.000180062	up	7.53907
1569607_s_at	ANKRD20A1 /// ANKRD20A2 /// ANKRD20A3 /// ANKRD20A4 /// C21orf81 /// LOC100132733 /// LOC284232 /// LOC643187 /// LOC647595 /// LOC653436 /// LOC727770 /// LOC728783	0.000136719	8.5252e-06	up	7.53686
213438_at	NFASC	5.68995e-05	2.70387e-06	down	-7.51948
228461_at	SH3RF3	1.1362e-06	1.623e-08	up	7.51909
205659_at	HDAC9	7.84055e-05	4.09128e-06	up	7.51567
229130_at		1.2024e-06	1.76155e-08	up	7.51519
203729_at	EMP3	2.06525e-07	1.73001e-09	down	-7.51304
212096_s_at	MTUS1	4.8902e-05	2.21993e-06	up	7.51239
213882_at	TM2D1	0.000136827	8.53868e-06	up	7.50706
226021_at	RDH10	3.18481e-05	1.27625e-06	up	7.50296
209200_at	MEF2C	1.9173e-07	1.56049e-09	up	7.50281
231969_at	STOX2	8.14719e-06	2.1547e-07	up	7.4991
235238_at	SHC4	9.25364e-07	1.24097e-08	up	7.49791
203477_at	COL15A1	0.000289616	2.27407e-05	down	-7.49285
202954_at	UBE2C	3.91062e-06	8.12366e-08	down	-7.49214
243747_at	ZNF599	4.79773e-07	5.29133e-09	up	7.47618
1559455_at		3.8332e-07	3.96115e-09	up	7.47519
204639_at	ADA	7.44651e-06	1.90896e-07	up	7.4731
238521_at		1.66142e-07	1.30361e-09	up	7.46081
235684_s_at	SESN3	3.96525e-07	4.12664e-09	up	7.45626
215440_s_at	BEX4	8.56478e-05	4.58198e-06	down	-7.45548
206018_at	FOXG1	7.56038e-06	1.94143e-07	up	7.45292
203324_s_at	CAV2	4.24619e-06	9.14085e-08	up	7.44883
204135_at	FILIP1L	2.08173e-05	7.29776e-07	up	7.43715
229537_at	LMO4	5.9461e-06	1.43446e-07	up	7.43535
227395_at	TBCEL	9.83058e-05	5.50457e-06	up	7.42169
207030_s_at	CSRP2	7.44651e-06	1.90858e-07	up	7.41698
218031_s_at	FOXN3	0.000111639	6.49313e-06	up	7.41615
202023_at	EFNA1	3.47463e-06	6.92066e-08	up	7.40825
227268_at	RNFT1	5.42116e-05	2.52541e-06	up	7.40776
214068_at	BEAN	0.000318865	2.57134e-05	up	7.39544
229973_at	C1orf173	5.83611e-07	6.84215e-09	up	7.39508
210755_at	HGF	1.74409e-05	5.76099e-07	down	-7.3784
203320_at	SH2B3	5.90374e-07	6.95383e-09	down	-7.35842
225957_at	C5orf41	0.000587551	5.62566e-05	up	7.35736
202734_at	TRIP10	1.48959e-07	1.1143e-09	down	-7.3558
219684_at	RTP4	6.19858e-06	1.50557e-07	up	7.3538
204205_at	APOBEC3G	0.000946525	0.000103386	up	7.35069
226124_at	ZFP90	8.66613e-06	2.34267e-07	up	7.3475
222908_at	FAM38B	6.37335e-08	3.50869e-10	up	7.34661
204005_s_at	PAWR	1.84223e-06	3.08678e-08	up	7.3444
213637_at		0.00119598	0.00014039	up	7.34372
218692_at	GOLSYN	8.49166e-06	2.27842e-07	down	-7.34352
219557_s_at	NRIP3	3.0586e-06	5.8235e-08	down	-7.34167
239611_at		1.05638e-05	2.97878e-07	up	7.33643
209324_s_at	RGS16	8.00304e-07	1.03194e-08	up	7.33585
232195_at	GPR158	1.0388e-05	2.91452e-07	up	7.32056
202284_s_at	CDKN1A	1.28246e-05	3.87107e-07	down	-7.31662
231729_s_at	CAPS	1.26837e-05	3.81382e-07	up	7.3138
212573_at	ENDOD1	1.49757e-07	1.12301e-09	up	7.30866
207876_s_at	FLNC	7.1676e-06	1.80911e-07	down	-7.30685
205871_at	PLGLB1 /// PLGLB2	1.52756e-06	2.40293e-08	up	7.30672
236918_s_at	LRRC34	7.12486e-05	3.59875e-06	down	-7.30111
206633_at	CHRNA1	3.2418e-05	1.30561e-06	up	7.29572
205031_at	EFNB3	1.08911e-05	3.12142e-07	up	7.29444
211708_s_at	SCD	0.00760954	0.00148607	down	-7.28731
1568680_s_at	YTHDC2	8.61924e-05	4.619e-06	up	7.28611
239331_at		7.05105e-06	1.7784e-07	down	-7.2748
202724_s_at	FOXO1	3.21088e-06	6.20741e-08	up	7.27176
243010_at	MSI2	3.20488e-06	6.18408e-08	up	7.26924
235286_at		0.000878809	9.39486e-05	up	7.26084
219676_at	ZSCAN16	1.69344e-06	2.72871e-08	up	7.25782
216250_s_at	LPXN	3.12728e-07	3.0658e-09	down	-7.25472
235385_at		1.68239e-05	5.51719e-07	up	7.24075
226298_at	RUNDC1	0.000740969	7.55809e-05	up	7.23782
216705_s_at	ADA	1.19418e-05	3.52739e-07	up	7.2324
221565_s_at	CALHM2	1.33744e-07	9.58894e-10	down	-7.22922
204778_x_at	HOXB7	4.46198e-07	4.86391e-09	up	7.22912
243718_at		2.10799e-05	7.44811e-07	up	7.22534
204464_s_at	EDNRA	7.2937e-05	3.71789e-06	down	-7.21885
204939_s_at	PLN	5.52061e-05	2.58588e-06	up	7.21866
237622_at		0.000197096	1.3785e-05	down	-7.21436
1557293_at	LOC440993	0.00158499	0.000201621	up	7.21423
203929_s_at	MAPT	6.26613e-05	3.06344e-06	up	7.2112
244433_at		0.00304771	0.000460989	up	7.20281
232330_at	C7orf44	5.63173e-05	2.65956e-06	up	7.19557
213353_at	ABCA5	9.35272e-06	2.5659e-07	up	7.19322
237690_at	GPR115	0.00032633	2.65361e-05	down	-7.18377
222486_s_at	ADAMTS1	0.000261924	1.99479e-05	down	-7.17797
204393_s_at	ACPP	3.0881e-05	1.22733e-06	down	-7.17635
200878_at	EPAS1	1.73326e-06	2.81823e-08	down	-7.16201
241883_x_at		5.26543e-07	6.00938e-09	up	7.16197
220751_s_at	C5orf4	1.45502e-07	1.07661e-09	up	7.15644
235977_at	LONRF2	1.98253e-05	6.84595e-07	up	7.15555
202756_s_at	GPC1	1.42012e-05	4.43633e-07	up	7.15363
1569583_at	EREG	0.0114219	0.0025102	down	-7.14377
224909_s_at	PREX1	1.768e-05	5.87205e-07	down	-7.13559
223785_at	FANCI	4.9367e-06	1.12413e-07	down	-7.13533
1558214_s_at	CTNNA1	0.00916734	0.0018879	down	-7.13254
206071_s_at	EPHA3	2.97681e-07	2.87472e-09	up	7.1234
214642_x_at	MAGEA5	2.73141e-05	1.03554e-06	up	7.12207
222783_s_at	SMOC1	5.17781e-05	2.38364e-06	down	-7.11264
227473_at		0.000214494	1.53583e-05	down	-7.1082
227349_at	HELLS	0.00189545	0.000253524	down	-7.1058
212235_at	PLXND1	7.14341e-05	3.61515e-06	up	7.10462
229881_at	KLF12	3.04913e-06	5.78316e-08	down	-7.10455
236471_at	NFE2L3	3.32837e-07	3.32989e-09	up	7.10395
203372_s_at	SOCS2	1.5557e-07	1.18651e-09	up	7.09884
229759_s_at	VEPH1	1.39155e-07	1.01805e-09	down	-7.09866
227230_s_at	KIAA1211	7.77883e-05	4.05022e-06	up	7.09555
226352_at	JMY	0.00093095	0.000101276	up	7.09488
211924_s_at	PLAUR	1.61329e-07	1.24125e-09	down	-7.08883
226197_at		0.000189177	1.30097e-05	up	7.08346
214490_at	ARSF	1.64657e-05	5.36886e-07	up	7.07785
230304_at		0.00119529	0.000140243	up	7.07414
212268_at	SERPINB1	6.14067e-06	1.48701e-07	down	-7.07169
203582_s_at	RAB4A	0.000129425	7.93711e-06	up	7.07142
206953_s_at	LPHN2	2.98681e-06	5.61035e-08	down	-7.06733
205593_s_at	PDE9A	2.26335e-05	8.16339e-07	up	7.04415
226313_at	C10orf35	8.05127e-08	4.84292e-10	up	7.03865
206233_at	B4GALT6	1.61376e-05	5.22733e-07	down	-7.03289
238047_at	RP13-102H20.1	0.000173951	1.1689e-05	up	7.02736
209505_at	NR2F1	2.10212e-05	7.41269e-07	up	7.02602
228999_at	CHD2	0.00271417	0.000398525	up	7.02535
209156_s_at	COL6A2	9.16617e-05	5.01604e-06	down	-7.01852
211126_s_at	CSRP2	4.26268e-06	9.19975e-08	up	7.01829
228302_x_at	CAMK2N1	0.00136444	0.000166303	down	-7.01768
222540_s_at	RSF1	2.89357e-06	5.40344e-08	up	7.01687
204052_s_at	SFRP4	7.47069e-05	3.83543e-06	up	7.01352
232793_at		4.46678e-05	1.96563e-06	up	7.00693
222900_at	NRIP3	4.35386e-08	2.08635e-10	down	-7.00505
229222_at	ACSS3	0.000869433	9.26264e-05	up	7.00229
201430_s_at	DPYSL3	2.51733e-05	9.35109e-07	up	7.00013
218735_s_at	ZNF544	5.90873e-06	1.42061e-07	up	6.9917
216971_s_at	PLEC1	0.000134775	8.36873e-06	down	-6.98895
214022_s_at	IFITM1	6.10272e-05	2.95676e-06	up	6.98842
243179_at	LOC100130360	1.19457e-06	1.73041e-08	up	6.98706
230419_at	FLJ37644 /// LOC727973	1.91533e-05	6.53993e-07	up	6.98691
1553798_a_at	FBXL13	3.12793e-05	1.24945e-06	down	-6.97734
206785_s_at	KLRC1 /// KLRC2	4.73701e-05	2.12873e-06	down	-6.9752
205373_at	CTNNA2	0.000106261	6.08123e-06	up	6.97464
1554408_a_at	TK1	1.83669e-07	1.46801e-09	down	-6.97024
210136_at	MBP	5.62445e-05	2.652e-06	up	6.96549
214927_at	ITGBL1	7.00507e-05	3.52464e-06	down	-6.95895
202728_s_at	LTBP1	7.30127e-06	1.85887e-07	down	-6.95358
227227_at		0.00130112	0.000156396	up	6.95168
1554314_at	C6orf141	0.000808807	8.45272e-05	up	6.95077
243036_at	RP4-692D3.1	0.000109248	6.31613e-06	down	-6.9453
239262_at		2.31109e-06	4.05365e-08	up	6.94055
1556794_at		1.41663e-06	2.18163e-08	up	6.93835
213332_at	PAPPA2	6.02592e-07	7.1749e-09	down	-6.93637
223206_s_at	NMRAL1	1.29198e-05	3.91552e-07	down	-6.93329
235333_at	B4GALT6	0.000117303	6.94861e-06	down	-6.92996
213782_s_at	MYOZ2	0.00631542	0.00116617	down	-6.92059
205453_at	HOXB2	1.90786e-06	3.21727e-08	down	-6.91892
231836_at	HKR1	3.0526e-06	5.80092e-08	up	6.91446
205893_at	NLGN1	0.00220059	0.000305769	up	6.90672
235661_at		0.000226884	1.64992e-05	down	-6.90287
225801_at		1.70365e-08	5.42176e-11	up	6.89929
208751_at	NAPA	1.24271e-06	1.84561e-08	down	-6.89768
205483_s_at	ISG15	9.57971e-05	5.33017e-06	up	6.89376
231215_at		0.000953456	0.0001043	up	6.8934
236660_at		0.000319756	2.58436e-05	up	6.88855
201601_x_at	IFITM1	3.00209e-05	1.17997e-06	up	6.88645
205609_at	ANGPT1	4.61876e-05	2.05869e-06	up	6.87535
230479_at		2.97914e-05	1.16659e-06	up	6.87014
213107_at	TNIK	4.02053e-06	8.47124e-08	up	6.8666
230403_at		0.000275523	2.13666e-05	up	6.86625
213447_at	IPW	5.07981e-07	5.7472e-09	up	6.8645
202627_s_at	SERPINE1	1.20331e-06	1.76947e-08	down	-6.86196
204238_s_at	C6orf108	2.95847e-05	1.15471e-06	up	6.85468
212801_at	CIT	3.91394e-06	8.16076e-08	down	-6.85399
227674_at	ZNF585A	8.3395e-06	2.22234e-07	up	6.84199
214866_at	PLAUR	2.31939e-06	4.07245e-08	down	-6.83999
213537_at	HLA-DPA1	0.000430827	3.77993e-05	down	-6.83989
212020_s_at	MKI67	0.000235804	1.73704e-05	down	-6.83777
225092_at	RABEP1	3.20464e-06	6.16018e-08	up	6.83737
227379_at	MBOAT1	1.89425e-08	6.61732e-11	up	6.82342
209472_at	CCBL2	0.00033358	2.72843e-05	up	6.82328
1555793_a_at	ZFP82	4.61681e-05	2.05614e-06	up	6.82287
1560225_at	CNR1	1.47732e-05	4.67447e-07	up	6.81238
207819_s_at	ABCB4	8.18197e-06	2.16839e-07	up	6.80844
212992_at	AHNAK2	0.000136254	8.49047e-06	down	-6.80827
219209_at	IFIH1	0.00104636	0.000118011	up	6.80734
205190_at	PLS1	0.000234978	1.72898e-05	up	6.79944
242006_at	LCA5	5.64817e-06	1.33986e-07	up	6.7967
213484_at		7.88134e-06	2.06277e-07	up	6.79603
210355_at	PTHLH	1.38351e-06	2.1205e-08	up	6.77949
238617_at		0.000885249	9.48313e-05	up	6.77814
213511_s_at	MTMR1	0.000251329	1.89203e-05	up	6.76897
201325_s_at	EMP1	4.23365e-05	1.83052e-06	down	-6.76559
228630_at	ZNF84	2.92434e-05	1.13658e-06	up	6.76409
218795_at	ACP6	2.4467e-05	8.99482e-07	up	6.75898
231853_at	TUBD1	0.000184774	1.26157e-05	up	6.75749
216603_at	SLC7A8	0.015298	0.00367935	down	-6.75531
229114_at	GAB1	0.00169807	0.000220539	up	6.75495
215509_s_at	BUB1	0.00276318	0.000407895	down	-6.75398
203697_at	FRZB	3.96698e-06	8.3244e-08	up	6.75385
217640_x_at	C18orf24	5.0782e-05	2.33221e-06	down	-6.75186
209990_s_at	GABBR2	1.20072e-06	1.75689e-08	up	6.75141
219443_at	TASP1	4.03615e-06	8.55366e-08	up	6.74594
230831_at	FRMD5	5.75591e-05	2.74452e-06	up	6.73628
225133_at	KLF3	5.10867e-05	2.34977e-06	up	6.73361
204846_at	CP	2.75983e-06	5.08809e-08	up	6.73225
235171_at		0.00209494	0.000287371	up	6.72241
219558_at	ATP13A3	0.00166415	0.000214521	down	-6.7199
218967_s_at	PTER	0.00105183	0.00011885	down	-6.71775
213348_at	CDKN1C	4.95251e-07	5.53449e-09	up	6.71764
202508_s_at	SNAP25	7.59174e-08	4.45867e-10	down	-6.71568
212406_s_at	PCMTD2	1.15865e-06	1.6593e-08	up	6.71543
217901_at	DSG2	3.33929e-07	3.34692e-09	down	-6.71095
204160_s_at	ENPP4	0.00573971	0.00103331	up	6.70631
206074_s_at	HMGA1	5.24561e-07	5.97716e-09	down	-6.70557
213387_at	ATAD2B	0.000105766	6.03937e-06	up	6.70549
208358_s_at	UGT8	1.36226e-07	9.81674e-10	down	-6.70492
228029_at	ZNF721	0.00116473	0.000135698	up	6.70433
203216_s_at	MYO6	0.00107933	0.000123044	up	6.69815
204143_s_at	ENOSF1	3.08907e-06	5.90977e-08	down	-6.69719
225048_at	PHF10	0.000698339	7.01213e-05	up	6.69174
229625_at	GBP5	7.65504e-07	9.68869e-09	up	6.69151
205363_at	BBOX1	4.06424e-08	1.8881e-10	up	6.68764
231468_at	LOC100131177	1.93871e-06	3.28703e-08	up	6.68462
230538_at	SHC4	0.000118166	7.02191e-06	up	6.68274
227657_at	RNF150	1.78111e-05	5.93868e-07	up	6.68078
241412_at	BTC	1.07939e-05	3.07778e-07	up	6.67647
219415_at	TTYH1	2.26834e-05	8.19799e-07	up	6.675
219555_s_at	CENPN	2.3665e-06	4.16384e-08	down	-6.66358
202067_s_at	LDLR	0.000187431	1.28417e-05	down	-6.65616
213668_s_at	SOX4	0.00036162	3.02392e-05	up	6.64808
205472_s_at	DACH1	8.01792e-06	2.11465e-07	up	6.64253
227329_at	ZBTB46	1.65404e-06	2.64916e-08	up	6.64152
225886_at	DDX5	0.000581682	5.54287e-05	up	6.62843
1552760_at	HDAC9	1.74178e-06	2.83845e-08	up	6.62798
202870_s_at	CDC20	2.76148e-05	1.04954e-06	down	-6.6276
238568_s_at		9.2784e-05	5.09103e-06	down	-6.62574
1553269_at	ZNF718	2.02923e-06	3.47507e-08	up	6.6253
242300_at		0.000493218	4.49421e-05	up	6.62205
203499_at	EPHA2	0.00153768	0.000194101	up	6.6176
230733_at		1.87674e-05	6.34937e-07	down	-6.61728
219229_at	SLCO3A1	4.21648e-05	1.82155e-06	up	6.60761
37965_at	PARVB	7.87874e-06	2.06065e-07	down	-6.60749
232014_at	ZNF30	7.22345e-06	1.82981e-07	up	6.60554
242838_at	MAP6D1	9.16181e-05	5.01198e-06	up	6.60186
1560142_at	GRIK2	3.56889e-07	3.6358e-09	up	6.60156
203474_at	IQGAP2	1.47968e-06	2.31391e-08	up	6.60049
215942_s_at	GTSE1	0.000309373	2.47612e-05	down	-6.59491
228783_at	BVES	4.88836e-06	1.10802e-07	up	6.59187
210649_s_at	ARID1A	0.00022277	1.61307e-05	down	-6.59182
230163_at	GFRA1	4.41122e-07	4.74922e-09	up	6.59169
208712_at	CCND1	1.45514e-05	4.58564e-07	down	-6.58892
232080_at	HECW2	0.000338695	2.77956e-05	down	-6.58861
234985_at	LDLRAD3	9.48756e-05	5.25792e-06	up	6.58153
216222_s_at	MYO10	7.86528e-05	4.1085e-06	up	6.58089
228493_at	NKAP	1.02029e-07	6.6454e-10	up	6.57637
223454_at	CXCL16	3.93708e-06	8.22666e-08	up	6.57318
209199_s_at	MEF2C	0.000200692	1.40916e-05	up	6.57301
225845_at	ZBTB44	0.000397107	3.41308e-05	up	6.5682
218113_at	TMEM2	9.94503e-08	6.35209e-10	up	6.56273
226587_at	SNRPN	0.00269134	0.000393794	up	6.56134
242629_at		0.0280168	0.00813319	down	-6.55985
230724_s_at	C11orf57	2.69557e-07	2.55158e-09	up	6.55941
218521_s_at	UBE2W	0.000144127	9.134e-06	up	6.55599
228617_at	XAF1	4.02664e-05	1.71008e-06	up	6.55598
1553313_s_at	SLC5A3	1.98384e-05	6.85642e-07	up	6.55352
236957_at	CDCA2	1.92498e-07	1.57026e-09	down	-6.55302
230494_at	SLC20A1	7.03785e-05	3.54628e-06	down	-6.55155
213956_at	CEP350	0.000426973	3.73752e-05	down	-6.55126
236738_at	LOC401097	4.17873e-08	1.97186e-10	up	6.5493
212181_s_at	NUDT4 /// NUDT4P1	3.75205e-05	1.56345e-06	up	6.54784
221269_s_at	SH3BGRL3	2.52465e-07	2.32263e-09	down	-6.54714
206114_at	EPHA4	2.56639e-07	2.37981e-09	up	6.54457
226424_at	CAPS	2.33316e-05	8.48344e-07	up	6.54362
222784_at	SMOC1	6.3656e-07	7.68413e-09	down	-6.54194
221833_at	LONP2	3.06679e-05	1.21709e-06	up	6.54096
215388_s_at	CFH /// CFHR1	1.72588e-07	1.36998e-09	down	-6.53464
210878_s_at	KDM3B	0.000491857	4.47912e-05	up	6.53362
201578_at	PODXL	3.96572e-06	8.29774e-08	up	6.53315
218640_s_at	PLEKHF2	9.42631e-05	5.20495e-06	up	6.53262
217553_at	MGC87042	1.93153e-07	1.57914e-09	down	-6.53081
241484_x_at		0.000289616	2.27469e-05	up	6.53025
223854_at	PCDHB10	0.000274416	2.12456e-05	up	6.5211
203789_s_at	SEMA3C	0.00104819	0.000118287	up	6.51756
233587_s_at	SIPA1L2	0.000190581	1.3133e-05	up	6.51675
218309_at	CAMK2N1	0.000572204	5.42743e-05	down	-6.51673
1554609_at		0.000696363	6.98847e-05	up	6.51354
209781_s_at	KHDRBS3	0.000141136	8.87469e-06	up	6.51066
241815_at		0.000375829	3.17711e-05	up	6.50485
235697_at		1.02029e-07	6.63709e-10	up	6.50419
1559966_a_at	LOC100192378	1.29658e-06	1.94694e-08	up	6.5033
231960_at	BRWD1	0.000141628	8.91864e-06	up	6.50212
219990_at	E2F8	0.000190581	1.31342e-05	down	-6.50184
212919_at	DCP2	0.000519381	4.80385e-05	up	6.49998
1557053_s_at	UBE2G2	5.03773e-05	2.30902e-06	up	6.49246
203619_s_at	FAIM2	3.60711e-05	1.48781e-06	down	-6.49061
242919_at	ZNF253	4.52017e-09	9.09408e-12	up	6.49022
231738_at	PCDHB7	0.000118133	7.01773e-06	up	6.48262
225564_at	SPATA13	0.000135146	8.40661e-06	up	6.48022
217403_s_at	ZNF227	1.07758e-05	3.06359e-07	up	6.47355
241198_s_at	C11orf70	3.51443e-06	7.04481e-08	up	6.47021
222890_at	CCDC113	0.00066679	6.61607e-05	up	6.46972
221245_s_at	FZD5	0.000190839	1.31729e-05	up	6.46786
224204_x_at	ARNTL2	3.32998e-06	6.51075e-08	down	-6.46719
240450_at		0.0207594	0.005488	down	-6.46612
223578_x_at	MALAT1	0.0387888	0.0125948	down	-6.46507
225332_at	LOC729082	0.000275523	2.13791e-05	up	6.46249
219913_s_at	CRNKL1	0.000526767	4.88566e-05	up	6.45662
235707_at	LOC221710	6.4649e-07	7.82765e-09	up	6.45612
217875_s_at	PMEPA1	1.20645e-05	3.57465e-07	up	6.4545
202580_x_at	FOXM1	1.82059e-05	6.10445e-07	down	-6.45228
204030_s_at	SCHIP1	3.43567e-05	1.40066e-06	up	6.4513
1555974_a_at		2.00479e-06	3.42474e-08	up	6.44796
222958_s_at	DEPDC1	2.46627e-06	4.41154e-08	down	-6.44516
201755_at	MCM5	0.00030258	2.40847e-05	down	-6.44507
228948_at	EPHA4	2.47822e-05	9.16953e-07	up	6.43933
230192_at	TRIM13	0.000422168	3.68543e-05	up	6.42106
203661_s_at	TMOD1	0.000855348	9.07776e-05	up	6.41458
230438_at	TBX15	1.3376e-07	9.61454e-10	down	-6.40986
214415_at	PLGLB1 /// PLGLB2	1.13532e-05	3.28292e-07	up	6.40498
56256_at	SIDT2	9.19737e-05	5.03648e-06	up	6.39182
229674_at	SERTAD4	3.36575e-06	6.64223e-08	up	6.38599
223497_at	FAM135A	0.000430664	3.77771e-05	up	6.38421
233884_at	HIVEP3	3.73926e-06	7.66659e-08	up	6.38328
211422_at	TRPM3	2.30871e-05	8.36919e-07	up	6.38026
209227_at	TUSC3	1.135e-07	7.76387e-10	up	6.37585
225655_at	UHRF1	0.00446937	0.000751231	down	-6.37112
239155_at	CXADRP1	2.98623e-06	5.60379e-08	up	6.36921
241739_at	OGFOD1	5.04539e-07	5.68442e-09	up	6.36908
222494_at	FOXN3	1.17533e-05	3.44805e-07	up	6.36579
204475_at	MMP1	0.000710566	7.18039e-05	down	-6.36279
1554966_a_at	FILIP1L	9.92273e-06	2.7604e-07	up	6.35946
235252_at	KSR1	3.79781e-05	1.58859e-06	up	6.34921
231361_at	NLGN1	0.00138912	0.000170073	up	6.34392
242794_at	MAML3	1.55635e-05	5.00137e-07	up	6.34281
229331_at	SPATA18	0.000720486	7.3083e-05	down	-6.34271
222162_s_at	ADAMTS1	0.000242363	1.80104e-05	down	-6.34112
221669_s_at	ACAD8	6.30708e-05	3.08577e-06	up	6.33984
238878_at	ARX	2.08836e-05	7.33788e-07	up	6.33614
204918_s_at	MLLT3	8.09782e-09	2.0587e-11	up	6.33447
202436_s_at	CYP1B1	4.8479e-05	2.19572e-06	down	-6.33384
203254_s_at	TLN1	0.00144582	0.000179131	down	-6.33329
221729_at	COL5A2	5.0277e-06	1.15213e-07	up	6.32425
205489_at	CRYM	0.000117303	6.95703e-06	down	-6.31957
244734_at	MTHFSD	5.78056e-06	1.38078e-07	up	6.31543
228260_at	ELAVL2	0.0194485	0.00503478	up	6.31229
204063_s_at	ULK2	1.16119e-07	7.98554e-10	up	6.31123
228408_s_at	SDAD1	0.000255543	1.9317e-05	up	6.31053
205928_at	ZNF443	0.000311194	2.49696e-05	up	6.30813
211519_s_at	KIF2C	3.06542e-06	5.8421e-08	down	-6.30343
202464_s_at	PFKFB3	4.45263e-06	9.71558e-08	up	6.30274
223423_at	GPR160	6.30219e-07	7.58507e-09	up	6.30003
220159_at	ABCA11P	2.25233e-07	1.99383e-09	up	6.29659
230309_at		0.00589998	0.00106982	down	-6.2922
203085_s_at	TGFB1	2.38328e-06	4.21246e-08	down	-6.28984
227503_at		0.000139061	8.72901e-06	up	6.28489
204575_s_at	MMP19	7.01516e-08	3.9775e-10	down	-6.28038
211470_s_at	SULT1C2	0.00120591	0.000141952	down	-6.27917
219310_at	C20orf39	9.33255e-06	2.55696e-07	down	-6.27619
201150_s_at	TIMP3	0.00592135	0.00107489	up	6.27615
244552_at	ZNF788	2.47697e-06	4.43521e-08	up	6.27034
230110_at	MCOLN2	3.54639e-05	1.45109e-06	up	6.26491
229641_at		4.39256e-05	1.9177e-06	down	-6.26256
238476_at	C5orf41	2.28989e-06	4.01229e-08	up	6.2622
219368_at	NAP1L2	9.62684e-07	1.30823e-08	up	6.25985
222772_at	MYEF2	4.19701e-05	1.81007e-06	up	6.25974
235575_at		2.88294e-05	1.11047e-06	up	6.25577
222664_at	KCTD15	0.000466449	4.18972e-05	up	6.25405
1554479_a_at	CARD8	0.000141628	8.91663e-06	up	6.24446
231786_at	HOXA13	8.36184e-06	2.22982e-07	up	6.24214
219257_s_at	SPHK1	0.000850613	9.01097e-05	down	-6.24066
219508_at	GCNT3	4.96721e-07	5.56e-09	down	-6.23579
201310_s_at	C5orf13	4.15648e-06	8.89722e-08	up	6.232
242853_at		0.00109583	0.000125407	down	-6.22425
228482_at	CDRT4	7.91714e-05	4.14428e-06	up	6.22422
204146_at	RAD51AP1	5.32331e-05	2.46523e-06	down	-6.22273
244764_at		0.000125443	7.61262e-06	up	6.22016
201774_s_at	NCAPD2	1.16273e-07	8.01735e-10	down	-6.21956
228160_at	LOC339290	8.37145e-08	5.08335e-10	up	6.21783
202444_s_at	ERLIN1	0.00427261	0.000708311	down	-6.21194
1555852_at		0.000430273	3.7735e-05	up	6.20933
204288_s_at	SORBS2	0.000249584	1.87205e-05	down	-6.20814
210998_s_at	HGF	0.000223234	1.61725e-05	down	-6.20562
221621_at	C17orf86	6.38277e-05	3.12981e-06	up	6.20449
209191_at	TUBB6	4.06444e-07	4.26701e-09	down	-6.20153
238115_at		3.00636e-06	5.6558e-08	up	6.2012
242239_at		0.00592036	0.00107448	up	6.19995
203680_at	PRKAR2B	0.000270421	2.08127e-05	up	6.19972
227680_at	ZNF326	0.000128525	7.8561e-06	up	6.19389
238905_at	RHOJ	2.85594e-05	1.0985e-06	up	6.19131
234068_s_at	AP2A1	0.000214494	1.53588e-05	down	-6.18984
202679_at	NPC1	1.58275e-07	1.21293e-09	down	-6.1879
205051_s_at	KIT	0.000141893	8.93787e-06	up	6.18773
203498_at	RCAN2	1.54756e-05	4.95333e-07	up	6.18771
206648_at	ZNF571	4.24134e-07	4.49927e-09	up	6.18321
234233_s_at		0.000676501	6.7446e-05	down	-6.18191
226148_at	ZBTB44	0.000444659	3.93629e-05	up	6.18151
224365_s_at	TIGD7	0.000283693	2.21713e-05	up	6.17994
1555259_at	ZAK	0.0141515	0.00332647	down	-6.17663
209714_s_at	CDKN3	2.68322e-06	4.89777e-08	down	-6.17036
211721_s_at	ZNF551	4.67781e-06	1.04294e-07	up	6.16758
227083_at	B3GALTL	2.79539e-06	5.18943e-08	up	6.16623
232136_s_at	CTTNBP2	2.63586e-07	2.47315e-09	down	-6.16535
215283_at	LOC339290	6.25175e-09	1.44081e-11	up	6.16442
202998_s_at	LOXL2	1.30978e-06	1.97702e-08	down	-6.16171
229815_at		0.000607955	5.87805e-05	up	6.15773
228239_at	FAM165B	0.000390049	3.33084e-05	up	6.15663
238123_at	GABRQ	2.06205e-06	3.54518e-08	down	-6.15385
204497_at	ADCY9	0.00110873	0.000127329	up	6.15156
202016_at	MEST	0.000300995	2.39254e-05	up	6.15023
213322_at	C6orf130	0.000420247	3.65944e-05	up	6.15007
203080_s_at	BAZ2B	0.00038735	3.30187e-05	up	6.14709
231274_s_at		0.000367329	3.09114e-05	down	-6.14328
209946_at	VEGFC	3.34735e-07	3.36331e-09	down	-6.1388
38671_at	PLXND1	6.78978e-05	3.38899e-06	up	6.13214
230876_at	LOC169834	7.98777e-05	4.1944e-06	up	6.1307
230660_at	SERTAD4	9.17122e-07	1.22451e-08	up	6.12519
55872_at	ZNF512B	0.00100564	0.000112032	up	6.11598
217921_at	MAN1A2	1.44042e-05	4.5152e-07	up	6.11583
227209_at	CNTN1	0.000806809	8.42487e-05	up	6.11525
226510_at	HEATR5A	0.00156695	0.000198609	up	6.11477
213931_at	ID2 /// ID2B	0.00327448	0.000506848	up	6.11438
205540_s_at	RRAGB	1.44042e-05	4.51556e-07	up	6.11131
1562474_at		6.3348e-06	1.55256e-07	up	6.10725
238735_at		0.000252529	1.90384e-05	up	6.10708
230399_at		0.000811813	8.49601e-05	up	6.10668
240419_at	SLC6A15	2.75783e-05	1.04765e-06	down	-6.10511
202238_s_at	NNMT	5.20477e-06	1.20517e-07	up	6.10289
209621_s_at	PDLIM3	2.07627e-05	7.26079e-07	up	6.10281
202729_s_at	LTBP1	3.89435e-08	1.76644e-10	down	-6.10222
207172_s_at	CDH11	0.000502381	4.6062e-05	up	6.09262
226753_at	FAM76B	0.000564852	5.34427e-05	up	6.08354
241014_at	LOC339400	4.02657e-07	4.2116e-09	up	6.08175
222364_at	SLC44A1	0.00372823	0.000595289	down	-6.08096
1569661_at		0.000271526	2.09515e-05	up	6.07619
212239_at	PIK3R1	0.000618745	6.01819e-05	up	6.07425
243689_s_at	LOC283788	0.000708341	7.14236e-05	up	6.07236
57715_at	CALHM2	8.22321e-07	1.07838e-08	down	-6.068
210346_s_at	CLK4	0.000704662	7.08979e-05	up	6.05828
213040_s_at	NPTXR	1.31564e-05	4.01368e-07	down	-6.05638
1555004_a_at	RBL1	1.41969e-05	4.43239e-07	down	-6.05388
1557078_at	SLFN5	0.00096594	0.000106002	down	-6.0522
218764_at	PRKCH	1.16429e-06	1.66951e-08	up	6.05109
219895_at	FAM70A	2.39645e-05	8.76297e-07	down	-6.05086
203370_s_at	PDLIM7	4.84638e-05	2.19383e-06	down	-6.04598
230314_at		0.000211071	1.50596e-05	up	6.0425
203836_s_at	MAP3K5	1.7472e-05	5.77766e-07	up	6.03512
229622_at	FAM132B	2.90621e-05	1.12695e-06	down	-6.03446
209538_at	ZNF32	4.18182e-05	1.7974e-06	up	6.03399
236692_at	LOC729839	0.000212642	1.51967e-05	up	6.03154
1565830_at		4.98799e-06	1.14037e-07	up	6.03136
238613_at	ZAK	0.000533749	4.96994e-05	down	-6.02213
209234_at	KIF1B	3.02562e-05	1.1942e-06	up	6.02124
206084_at	PTPRR	0.00172601	0.000225348	up	6.01557
202068_s_at	LDLR	4.48738e-06	9.84455e-08	down	-6.01515
242981_at		0.00127943	0.000152876	up	6.01278
209840_s_at	LRRN3	3.29876e-05	1.33166e-06	up	6.00814
242708_at		1.05638e-05	2.98116e-07	up	6.00808
240214_at		1.91881e-05	6.56624e-07	up	6.00454
223402_at	DUSP23	1.38564e-05	4.27794e-07	down	-6.00134
241700_at	ZFHX4	3.96525e-07	4.13184e-09	up	6.00118
235363_at		1.04726e-05	2.94018e-07	up	5.99901
1558733_at	ZBTB38	0.000238025	1.75966e-05	down	-5.9974
226814_at	ADAMTS9	8.86082e-07	1.17496e-08	up	5.98685
204781_s_at	FAS	5.12961e-06	1.18307e-07	down	-5.98507
219148_at	PBK	4.83047e-05	2.18483e-06	down	-5.97629
225665_at	ZAK	1.14635e-05	3.3316e-07	down	-5.97557
225330_at	IGF1R	9.36193e-05	5.15231e-06	up	5.97325
214799_at	NFASC	5.81067e-05	2.78444e-06	down	-5.9698
205404_at	HSD11B1	0.000131822	8.12272e-06	down	-5.96905
229053_at	SYT17	1.08446e-05	3.10016e-07	up	5.96889
217546_at	MT1M	0.00362575	0.000573754	down	-5.96858
207165_at	HMMR	6.08392e-05	2.94654e-06	down	-5.96844
1558683_a_at	HMGA2	6.16433e-05	3.00317e-06	down	-5.96696
235112_at		0.00335151	0.000521101	up	5.96449
201596_x_at	KRT18	1.04868e-05	2.94609e-07	up	5.96278
227140_at		0.00498892	0.000865702	up	5.95375
228908_s_at	LOC642852	0.000676337	6.73801e-05	up	5.95305
211681_s_at	PDLIM5	0.000310302	2.48639e-05	down	-5.95256
209574_s_at	C18orf1	3.76584e-05	1.57246e-06	up	5.95233
203554_x_at	PTTG1	9.49533e-07	1.28341e-08	down	-5.94466
237083_at		1.00755e-06	1.3865e-08	up	5.94268
222134_at	DDO	0.000102288	5.78773e-06	up	5.94214
241706_at	CPNE8	1.32851e-05	4.06754e-07	down	-5.93653
227548_at	ORMDL1	0.000209943	1.49408e-05	up	5.93427
220994_s_at	STXBP6	7.44541e-05	3.81837e-06	down	-5.93366
216044_x_at	FAM69A	2.88752e-05	1.11406e-06	up	5.92609
206644_at	NR0B1	8.70546e-05	4.67316e-06	down	-5.92575
227909_at	NCRNA00086 /// NCRNA00087	1.76512e-05	5.8563e-07	up	5.9239
220283_at	HHIPL2	0.00011541	6.78684e-06	down	-5.92123
227776_at	ACER3	0.000212019	1.51351e-05	up	5.91863
203426_s_at	IGFBP5	6.33141e-05	3.1023e-06	up	5.91606
241708_at	DOCK1	0.00182747	0.000241958	down	-5.91567
203801_at	MRPS14	9.45582e-05	5.23276e-06	up	5.9134
228200_at	ZNF252	2.52463e-06	4.55288e-08	up	5.91284
203293_s_at	LMAN1	0.0399305	0.013102	down	-5.90762
203417_at	MFAP2	1.62878e-05	5.28988e-07	down	-5.90593
213241_at	PLXNC1	3.83251e-08	1.72437e-10	up	5.90592
228662_at	SOCS7	0.000853761	9.05282e-05	up	5.9013
229005_at	MCTP2	0.000163441	1.07526e-05	down	-5.89765
203819_s_at	IGF2BP3	0.000226501	1.64506e-05	down	-5.89323
229824_at		4.11743e-06	8.78083e-08	down	-5.89055
240239_at	ZNF566	4.3161e-07	4.59437e-09	up	5.88626
227866_at	LOC729436	0.000480527	4.35397e-05	up	5.88171
220850_at	MORC1	0.0139901	0.00327748	down	-5.88009
207236_at	ZNF345	2.65404e-06	4.82993e-08	up	5.87891
244163_at	SEMA3A	6.92767e-06	1.73334e-07	up	5.87638
1558944_at	CACNA1A	7.74267e-06	2.00807e-07	down	-5.87497
235371_at	GLT8D4	6.52357e-05	3.2239e-06	down	-5.87119
210587_at	INHBE	0.00707159	0.00135159	down	-5.86018
243904_at		0.000554753	5.22335e-05	down	-5.86015
1559397_s_at	PRR14	0.00012769	7.78869e-06	down	-5.85746
226905_at	FAM101B	1.46136e-06	2.26922e-08	up	5.85357
1563754_at	GRIK2	6.52412e-07	7.95086e-09	up	5.85272
232000_at	TTC39B	0.000353914	2.94394e-05	up	5.85113
228601_at	LOC401022	0.000325799	2.64827e-05	up	5.85089
222077_s_at	RACGAP1	3.90355e-06	8.08911e-08	down	-5.84465
221778_at	JHDM1D	0.000984475	0.000108828	up	5.84437
244519_at	ASXL1	2.06288e-06	3.55037e-08	down	-5.84071
227955_s_at	EFNA5	0.000700572	7.03839e-05	down	-5.83542
203151_at	MAP1A	1.77699e-05	5.91624e-07	down	-5.82894
1569106_s_at	SETD5	0.000456045	4.07208e-05	down	-5.82544
235174_s_at	LOC100128822	9.47331e-06	2.60938e-07	up	5.82338
1557286_at		3.57045e-05	1.46606e-06	up	5.82277
222881_at	HPSE	0.00127761	0.000152612	up	5.82001
212091_s_at	COL6A1	2.72511e-05	1.02974e-06	down	-5.81748
230612_at	WDR73	4.10444e-06	8.74563e-08	up	5.81711
218384_at	CARHSP1	7.58853e-06	1.95068e-07	down	-5.81269
230766_at		4.17292e-06	8.96786e-08	up	5.81199
202017_at	EPHX1	1.39649e-05	4.32419e-07	down	-5.81082
201688_s_at	TPD52	0.00492306	0.000850359	up	5.81009
214298_x_at	2006-09-01	1.87187e-07	1.50298e-09	up	5.80893
235635_at	ARHGAP5	0.0057991	0.00104755	up	5.80421
209709_s_at	HMMR	0.000111828	6.51029e-06	down	-5.80001
226135_at	UHRF1BP1	0.000153542	9.91878e-06	up	5.79972
204724_s_at	COL9A3	8.47549e-05	4.52491e-06	up	5.79611
225647_s_at	CTSC	0.000159056	1.03856e-05	up	5.7909
1555950_a_at	CD55	3.32516e-05	1.34405e-06	down	-5.78473
225662_at	ZAK	0.000123938	7.49637e-06	down	-5.78263
222108_at	AMIGO2	7.33814e-06	1.8696e-07	up	5.7826
232336_at	ZSWIM5	4.72206e-06	1.05626e-07	up	5.78151
223059_s_at	FAM107B	0.00116171	0.000135219	up	5.78093
1556088_at	RPAIN	3.00209e-05	1.17965e-06	up	5.78044
200785_s_at	LOC100134190 /// LRP1	2.98409e-06	5.59432e-08	down	-5.77987
213156_at		1.02104e-05	2.85909e-07	up	5.77652
236562_at	ZNF439	3.7276e-06	7.62e-08	up	5.77617
206866_at	CDH4	0.00028155	2.19833e-05	up	5.77426
229383_at		0.000499174	4.56583e-05	up	5.77011
215307_at	ZNF529	4.89403e-06	1.11129e-07	up	5.77004
209185_s_at	IRS2	0.000143759	9.10541e-06	up	5.76236
235318_at	FBN1	5.80818e-06	1.3895e-07	down	-5.76183
230053_at		1.62175e-05	5.25902e-07	up	5.75551
210871_x_at	SSX2IP	0.000218165	1.56856e-05	up	5.74948
52940_at	SIGIRR	1.3324e-05	4.08188e-07	down	-5.74942
205342_s_at	SULT1C2	6.31136e-05	3.08902e-06	down	-5.74654
224518_s_at	ZNF559	0.000235804	1.73721e-05	up	5.74507
204569_at	ICK	3.80703e-05	1.59453e-06	up	5.73877
223058_at	FAM107B	7.02876e-05	3.53784e-06	up	5.73637
213689_x_at	FAM69A	2.69576e-05	1.01618e-06	up	5.73385
212993_at	NACC2	0.000592076	5.68089e-05	up	5.72995
229544_at		0.00160165	0.000204267	up	5.72657
204069_at	MEIS1	7.17011e-05	3.64309e-06	up	5.72234
218723_s_at	C13orf15	8.14125e-05	4.30179e-06	up	5.72122
204646_at	DPYD	2.29566e-05	8.31349e-07	up	5.7175
212647_at	RRAS	7.15039e-05	3.62316e-06	down	-5.71682
227567_at	LOC651250	0.000556694	5.2492e-05	up	5.71678
204682_at	LTBP2	1.27305e-05	3.83254e-07	down	-5.71458
213340_s_at	KIAA0495	0.000105631	6.0297e-06	up	5.71263
213501_at	ACOX1	0.00114056	0.000132089	up	5.70953
226505_x_at	USP32	0.000293758	2.31675e-05	up	5.70442
206302_s_at	NUDT4 /// NUDT4P1	0.000454463	4.04968e-05	up	5.70441
241834_at	IPW	1.28144e-06	1.91952e-08	up	5.70174
233461_x_at	ZNF226	0.00140006	0.000171626	up	5.69804
227556_at	NME7	5.12811e-05	2.35982e-06	down	-5.694
229317_at	KPNA5	7.41e-05	3.79072e-06	up	5.69034
209841_s_at	LRRN3	0.000495106	4.51594e-05	up	5.68928
1556051_a_at	BICD1	0.000353817	2.94055e-05	up	5.68901
221016_s_at	TCF7L1	1.90172e-05	6.46602e-07	up	5.68709
229586_at	CHD9	0.000694199	6.95786e-05	up	5.68624
229105_at	GPR39	3.47851e-06	6.9426e-08	up	5.6858
231923_at	FLJ12993	0.000120111	7.20335e-06	up	5.68112
213058_at	TTC28	2.71563e-05	1.02566e-06	up	5.67971
212749_s_at	RCHY1	0.000585354	5.59392e-05	up	5.67598
228171_s_at	PLEKHG4	6.75658e-06	1.68065e-07	down	-5.67463
228992_at	MED28	1.61376e-05	5.23014e-07	up	5.6646
225974_at	TMEM64	1.44429e-05	4.53297e-07	up	5.66122
213424_at	KIAA0895	0.000422716	3.69253e-05	up	5.65516
213800_at	CFH	0.000117169	6.93689e-06	down	-5.65028
226415_at	VAT1L	8.20513e-06	2.17885e-07	down	-5.64898
236517_at	MEGF10	0.000535831	4.99227e-05	up	5.64342
239352_at	SLC6A15	4.61993e-05	2.06091e-06	down	-5.64336
215259_s_at	CADM4	8.68676e-06	2.34983e-07	up	5.64057
226121_at	DHRS13	0.000174153	1.1709e-05	up	5.63844
206501_x_at	ETV1	0.000138666	8.67883e-06	down	-5.63469
228369_at	CNPY3	3.55074e-06	7.13857e-08	up	5.63102
52837_at	KIAA1644	1.95254e-05	6.73163e-07	down	-5.62854
1557779_at		3.1644e-09	5.44039e-12	up	5.62053
230599_at		0.00932668	0.00193084	up	5.62051
213652_at	PCSK5	0.00138057	0.000168698	down	-5.61992
202581_at	HSPA1A /// HSPA1B	0.00756507	0.00147427	up	5.61923
205381_at	LRRC17	0.000174751	1.17588e-05	up	5.61827
227511_at	SAMD4B	4.8479e-05	2.19709e-06	down	-5.61768
214683_s_at	CLK1	0.000288118	2.2591e-05	up	5.61655
219999_at	MAN2A2	3.57045e-05	1.4656e-06	up	5.61566
206254_at	EGF	3.04595e-06	5.77157e-08	up	5.61496
206960_at	LPAR4	2.41027e-07	2.19536e-09	up	5.61202
220117_at	ZNF385D	0.000163619	1.07762e-05	down	-5.60927
228280_at	ZC3HAV1L	0.00274201	0.000403917	down	-5.6071
220390_at	AGBL2	1.99445e-07	1.64332e-09	up	5.60559
227168_at	MIAT	0.000215977	1.55045e-05	up	5.60195
212736_at	C16orf45	4.56176e-06	1.00964e-07	down	-5.59926
206491_s_at	NAPA	1.72762e-06	2.80591e-08	down	-5.59247
203767_s_at	STS	0.000389962	3.32939e-05	up	5.58993
214710_s_at	CCNB1	3.18098e-06	6.10888e-08	down	-5.58602
206695_x_at	ZNF43	7.59174e-08	4.49507e-10	up	5.58588
227859_at	DNAJC27	7.94677e-05	4.17094e-06	up	5.58406
212998_x_at	HLA-DQB1	0.0027814	0.000411093	down	-5.57605
231118_at	ANKRD35	0.000104981	5.97916e-06	down	-5.57521
201890_at	RRM2	7.5527e-05	3.89273e-06	down	-5.57288
226576_at	ARHGAP26	0.00015105	9.71637e-06	up	5.57154
218810_at	ZC3H12A	0.00214665	0.000296074	down	-5.57114
243462_s_at		0.000323044	2.61803e-05	up	5.5705
36612_at	FAM168A	0.000311785	2.50283e-05	up	5.5672
225803_at	FBXO32	3.90355e-06	8.08775e-08	up	5.56201
206247_at	MICB	3.06154e-05	1.21398e-06	down	-5.5618
215177_s_at	ITGA6	8.18197e-06	2.16792e-07	up	5.56109
223478_at	TIMM8B	4.11016e-08	1.92446e-10	up	5.55754
205880_at	PRKD1	0.00047291	4.26645e-05	up	5.55674
223182_s_at	AGPAT3	0.00997297	0.00210789	up	5.55096
228341_at		0.00744119	0.00144183	up	5.55073
220334_at	RGS17	1.30978e-06	1.98008e-08	down	-5.5491
209600_s_at	ACOX1	0.000310043	2.48242e-05	up	5.54796
202465_at	PCOLCE	8.16255e-07	1.06839e-08	down	-5.54737
232048_at	FAM76B	8.41652e-06	2.24748e-07	up	5.54726
227105_at	CSPP1	0.00135905	0.000165349	up	5.54616
230944_at		9.03725e-07	1.20206e-08	down	-5.54457
236273_at	NBPF1	3.60711e-05	1.48903e-06	up	5.53985
203904_x_at	CD82	1.94703e-05	6.69841e-07	down	-5.53578
1557910_at	HSP90AB1	0.0163727	0.00401225	down	-5.53412
208951_at	ALDH7A1	2.07322e-05	7.24531e-07	up	5.53051
213375_s_at	N4BP2L1	2.3032e-05	8.345e-07	up	5.52788
227964_at	FRMD8	0.000435652	3.83728e-05	up	5.52462
225366_at	PGM2	5.39181e-05	2.50878e-06	up	5.52403
204603_at	EXO1	7.63586e-05	3.94537e-06	down	-5.51784
235518_at	SLC8A1	2.08836e-05	7.34124e-07	up	5.51736
214829_at	AASS	0.000212272	1.51609e-05	up	5.51357
235027_at		1.19457e-06	1.72913e-08	up	5.50892
214745_at	PLCH1	1.25609e-05	3.76541e-07	up	5.50763
227373_at	ATXN1L	0.000577508	5.49147e-05	up	5.50762
229526_at	AQP11	2.11551e-06	3.65257e-08	up	5.50547
226658_at	PDPN	8.45291e-05	4.51131e-06	down	-5.50403
206108_s_at	SFRS6	1.244e-05	3.72233e-07	up	5.5011
214484_s_at	SIGMAR1	3.265e-06	6.32995e-08	down	-5.49584
230692_at	LOC157503	2.81267e-05	1.07414e-06	up	5.49444
225324_at	CRLS1	1.45502e-07	1.08045e-09	up	5.4938
227539_at	GNA13	0.000712008	7.20277e-05	up	5.49036
205099_s_at	CCR1	0.00137044	0.00016726	down	-5.48838
235388_at	CHD9	7.33775e-05	3.74571e-06	up	5.48526
219854_at	ZNF14	0.000249645	1.87479e-05	up	5.48487
218432_at	FBXO3	4.06567e-05	1.7343e-06	up	5.4831
229055_at	GPR68	3.06814e-07	2.97415e-09	down	-5.48233
213649_at	SFRS7	0.00144582	0.000179057	up	5.47761
223085_at	RNF19A	2.92434e-05	1.13605e-06	up	5.47611
217651_at		8.4422e-06	2.26127e-07	up	5.47476
239253_at		0.000656981	6.48906e-05	down	-5.47432
229885_at		0.000581347	5.53648e-05	up	5.47125
232429_at		0.00257057	0.000371117	up	5.46998
235739_at		0.000353914	2.94295e-05	down	-5.46974
222016_s_at	ZNF323	2.94646e-05	1.14948e-06	up	5.46782
229754_at		5.18271e-06	1.19816e-07	up	5.4678
229905_at	RAP1GDS1	7.72261e-06	2.00145e-07	down	-5.46272
231311_at		1.2141e-07	8.47759e-10	up	5.46269
244246_at	MIPOL1	1.77887e-06	2.94621e-08	up	5.46152
240908_at		6.48813e-05	3.19689e-06	up	5.46064
220319_s_at	MYLIP	4.03615e-06	8.54469e-08	up	5.4605
227020_at	YPEL2	0.000830944	8.75391e-05	up	5.45651
202796_at	SYNPO	0.00286652	0.000426872	down	-5.4506
210830_s_at	PON2	0.000277725	2.16113e-05	up	5.44695
211423_s_at	SC5DL	0.000223872	1.6231e-05	up	5.4452
229464_at	MYEF2	0.000156827	1.02056e-05	up	5.4443
213306_at	MPDZ	4.47822e-06	9.79632e-08	up	5.44153
218966_at	MYO5C	0.000181917	1.2384e-05	up	5.4384
206261_at	ZNF239	0.000633361	6.19129e-05	up	5.43817
232676_x_at	MYEF2	0.000660542	6.53354e-05	up	5.43371
226132_s_at	MANEAL	3.20488e-06	6.18214e-08	up	5.42448
227132_at	ZNF706	0.000134619	8.34406e-06	up	5.42065
227717_at	FLJ41603	1.03071e-05	2.88994e-07	up	5.42019
202997_s_at	LOXL2	0.00460131	0.000779983	down	-5.41837
229479_at		3.63737e-06	7.37545e-08	up	5.41828
202435_s_at	CYP1B1	0.001022	0.000114508	down	-5.41774
203698_s_at	FRZB	7.0493e-06	1.77667e-07	up	5.4174
214720_x_at	2010-09-01	0.000914604	9.8951e-05	down	-5.41454
233786_at		0.000132005	8.14122e-06	up	5.41398
1564651_at	LOC221710	9.7818e-08	6.19022e-10	up	5.41389
218542_at	CEP55	3.7997e-05	1.59007e-06	down	-5.41181
200800_s_at	HSPA1A /// HSPA1B	0.0036552	0.000579551	up	5.41143
238631_at	ZNF140	7.24994e-06	1.84182e-07	up	5.41132
223213_s_at	ZHX1	7.7369e-05	4.01314e-06	up	5.40916
228093_at	ZNF599	0.000113526	6.64649e-06	up	5.40878
244503_at		0.0189109	0.00484991	down	-5.40825
1565579_at		0.000399258	3.43797e-05	down	-5.40587
225598_at	SLC45A4	9.80944e-07	1.33843e-08	up	5.40506
225997_at	MOBKL1A	0.000444659	3.93708e-05	up	5.40359
230009_at	FAM118B	3.02036e-06	5.68994e-08	up	5.40296
229125_at	KANK4	3.76588e-05	1.57316e-06	up	5.39996
200784_s_at	LOC100134190 /// LRP1	3.92554e-06	8.19212e-08	down	-5.39579
235467_s_at	KCNC4	0.000579495	5.51461e-05	down	-5.39516
226615_at	XPR1	0.00143169	0.000176752	up	5.39425
208851_s_at	THY1	3.78676e-05	1.58327e-06	up	5.39415
213083_at	SLC35D2	0.000845257	8.93877e-05	up	5.3937
225681_at	CTHRC1	0.000110472	6.40709e-06	up	5.39123
204732_s_at	TRIM23	0.00157522	0.000200119	up	5.38998
204929_s_at	VAMP5	4.46869e-05	1.96729e-06	down	-5.38932
238727_at		1.17625e-06	1.69096e-08	up	5.38731
227911_at	ARHGAP28	0.000223256	1.61782e-05	down	-5.38526
208721_s_at	ANAPC5	0.000155332	1.00803e-05	down	-5.38492
241925_x_at		0.00237453	0.000336811	down	-5.38483
226231_at		5.53349e-05	2.59596e-06	up	5.37974
236428_at		5.63494e-05	2.66313e-06	up	5.37909
217853_at	TNS3	1.01427e-06	1.40986e-08	up	5.37791
219635_at	ZNF606	0.000157241	1.02379e-05	up	5.3735
238907_at	ZNF780A	5.89038e-06	1.4144e-07	up	5.37155
225687_at	FAM83D	2.78883e-06	5.17215e-08	down	-5.36807
224822_at	DLC1	8.9771e-05	4.85839e-06	down	-5.36788
232315_at	LOC400713	2.25827e-06	3.93622e-08	up	5.36721
225604_s_at	GLIPR2	8.31654e-05	4.4294e-06	up	5.35931
211527_x_at	VEGFA	0.000318918	2.57293e-05	down	-5.35183
214890_s_at	FAM149A	0.000242447	1.80211e-05	up	5.34079
236635_at	ZNF667	3.96738e-05	1.68128e-06	up	5.34003
224771_at	NAV1	0.00963163	0.0020137	down	-5.33961
212397_at	RDX	8.94144e-06	2.43307e-07	up	5.33527
233401_at		0.000188727	1.29546e-05	up	5.33463
209459_s_at	ABAT	0.0008161	8.56177e-05	up	5.33138
218701_at	LACTB2	0.000239072	1.77169e-05	up	5.32983
209365_s_at	ECM1	5.91504e-05	2.84528e-06	down	-5.3256
227191_at		0.000426392	3.73088e-05	up	5.32153
205082_s_at	AOX1	0.00172968	0.000226069	down	-5.31699
217604_at		0.000183551	1.25154e-05	up	5.31651
203890_s_at	DAPK3	0.00745394	0.00144539	down	-5.31625
227524_at		4.94865e-05	2.25599e-06	up	5.31585
202630_at	APPBP2	0.00201078	0.000272573	up	5.3155
242953_at	ZNF234	2.22767e-06	3.87474e-08	up	5.3134
226431_at	FAM117B	0.007317	0.00141161	up	5.31296
204897_at	PTGER4	0.00173623	0.000227083	up	5.31209
229928_at		4.26268e-06	9.19798e-08	up	5.31147
216804_s_at	PDLIM5	1.51561e-05	4.83167e-07	down	-5.31068
223229_at	UBE2T	0.00024862	1.86254e-05	down	-5.30783
1564635_a_at	FHAD1	3.58201e-06	7.21893e-08	down	-5.30769
1552364_s_at	MSI2	2.06656e-06	3.5605e-08	up	5.30618
218318_s_at	NLK	0.00039404	3.3779e-05	up	5.30249
1557174_a_at		2.1371e-05	7.61032e-07	up	5.30155
225588_s_at	TMEM129	0.000229685	1.67694e-05	up	5.30053
201925_s_at	CD55	0.00103624	0.000116654	down	-5.3001
218349_s_at	ZWILCH	6.79366e-09	1.62775e-11	down	-5.29929
230652_at	ARAF	1.75909e-07	1.40277e-09	up	5.29646
205289_at	BMP2	6.47352e-05	3.18733e-06	down	-5.2948
223582_at	GPR98	7.93991e-05	4.16491e-06	up	5.29097
206932_at	CH25H	0.000241632	1.7934e-05	down	-5.29028
202223_at	STT3A	0.00088275	9.44722e-05	up	5.28755
205364_at	ACOX2	5.77624e-05	2.75844e-06	down	-5.28483
241853_at		0.000172413	1.15258e-05	up	5.27855
230578_at		5.61583e-07	6.53797e-09	up	5.27751
238890_at	PSMG1	0.00214507	0.000295779	up	5.27062
239252_at		0.00597515	0.00108684	up	5.26469
236429_at	ZNF83	2.22435e-06	3.86179e-08	up	5.26395
206011_at	CASP1	3.33186e-06	6.52403e-08	up	5.2624
1560562_a_at	ZNF677	1.56522e-07	1.19664e-09	up	5.25858
228214_at	SOX6	0.000916215	9.9221e-05	up	5.25761
243541_at	IL31RA	5.9091e-06	1.42337e-07	down	-5.25756
224614_at	DYNC1LI2	0.00037862	3.20762e-05	up	5.25744
203294_s_at	LMAN1	0.0397512	0.0130185	down	-5.25423
214983_at	TTTY15	1.27562e-06	1.90147e-08	up	5.25388
207761_s_at	METTL7A	5.65602e-05	2.67645e-06	up	5.24822
204291_at	ZNF518A	0.000581822	5.54739e-05	up	5.24819
217920_at	MAN1A2	5.21974e-07	5.93814e-09	up	5.24808
232884_s_at	ZNF853	4.49535e-05	1.98642e-06	up	5.24761
200617_at	MLEC	2.33126e-07	2.08076e-09	down	-5.24674
226679_at	SLC26A11	5.66101e-06	1.34497e-07	up	5.24672
219643_at	LRP1B	0.000185101	1.26583e-05	up	5.24608
204310_s_at	NPR2	8.14237e-05	4.30686e-06	down	-5.2455
242273_at		0.00135827	0.000165229	up	5.24465
230779_at	TNRC6B	0.011053	0.00241093	up	5.24298
208611_s_at	SPTAN1	9.55914e-05	5.315e-06	down	-5.24026
229953_x_at	LCA5	7.01516e-08	3.96198e-10	up	5.23812
208814_at	HSPA4	0.000151557	9.7545e-06	up	5.23601
228346_at	ZNF844	0.000227132	1.65255e-05	up	5.23436
232024_at	GIMAP2	0.00159152	0.000202713	up	5.23424
238601_at	PHKB	0.000441243	3.89956e-05	up	5.2327
216095_x_at	MTMR1	2.55141e-05	9.51966e-07	up	5.23255
203041_s_at	LAMP2	1.48753e-05	4.72038e-07	up	5.23212
204021_s_at	PURA	0.000964463	0.000105807	up	5.23157
233642_s_at	HEATR5B	0.000891258	9.57033e-05	up	5.22887
235685_at		0.00057235	5.43091e-05	up	5.22627
227441_s_at	ANKS1B	3.04507e-06	5.76432e-08	up	5.22426
239309_at	DLX6	3.38743e-10	1.89833e-13	up	5.22296
1555370_a_at	CAMTA1	0.00102892	0.000115679	up	5.22013
221436_s_at	CDCA3	1.21228e-07	8.42554e-10	down	-5.21438
232028_at	ZNF678	0.000245022	1.82738e-05	up	5.21166
218552_at	ECHDC2	1.23468e-05	3.67864e-07	up	5.21102
231299_at	AGAP3	1.18173e-05	3.47333e-07	down	-5.20802
203431_s_at	RICS	3.33697e-06	6.57324e-08	up	5.20799
1559400_s_at	PAPPA	0.000682807	6.8237e-05	down	-5.20737
225179_at	UBE2K	0.00023823	1.76206e-05	up	5.20523
225391_at	LOC93622	1.66284e-05	5.44091e-07	up	5.2052
244319_at		2.14496e-06	3.71518e-08	up	5.20415
1558636_s_at	ADAMTS5	1.07837e-05	3.07099e-07	down	-5.20216
223183_at	AGPAT3	1.19372e-05	3.52227e-07	up	5.20192
203019_x_at	SSX2IP	0.000176486	1.19268e-05	up	5.19811
202341_s_at	TRIM2	6.73253e-05	3.3518e-06	up	5.19605
218138_at	MKKS	9.62299e-05	5.36283e-06	up	5.19596
223295_s_at	LUC7L	0.00546373	0.000969131	up	5.19356
229889_at	C17orf76	0.000134726	8.36123e-06	up	5.19338
217936_at	ARHGAP5	0.0013354	0.000161787	up	5.19314
225951_s_at	CHD2	1.45227e-08	4.32959e-11	up	5.18678
1558512_at		7.22693e-06	1.83333e-07	up	5.18463
230657_at		2.64345e-06	4.801e-08	up	5.18214
232453_at		0.00638032	0.00118288	down	-5.18207
218273_s_at	PPM2C	8.24883e-06	2.19214e-07	up	5.1813
230760_at	ZFY	1.33297e-06	2.03329e-08	up	5.17955
203531_at	CUL5	0.000148962	9.52995e-06	up	5.17954
1553227_s_at	BRWD1	0.000176486	1.19364e-05	up	5.17911
223721_s_at	DNAJC12	6.07276e-05	2.94003e-06	up	5.17846
225173_at	ARHGAP18	0.000651399	6.41808e-05	up	5.17758
222258_s_at	SH3BP4	4.5428e-06	1.0037e-07	up	5.17479
1555758_a_at	CDKN3	1.84223e-06	3.09192e-08	down	-5.17357
233337_s_at	LOC652900 /// SEZ6L2	1.55675e-05	5.00552e-07	down	-5.16981
208454_s_at	PGCP	2.26389e-05	8.16946e-07	up	5.168
202127_at	PRPF4B	0.00228684	0.000320805	up	5.16445
1564158_a_at	LOC100130894	8.79227e-06	2.38365e-07	up	5.16301
206110_at		1.54678e-05	4.94798e-07	up	5.16186
217997_at	PHLDA1	1.029e-06	1.44541e-08	up	5.15937
228523_at	NANOS1	4.02657e-07	4.21989e-09	up	5.15841
205696_s_at	GFRA1	1.34812e-06	2.05886e-08	up	5.15799
823_at	CX3CL1	6.26148e-07	7.51263e-09	up	5.15681
209184_s_at	IRS2	0.00080674	8.42226e-05	up	5.15656
1552275_s_at	PXK	0.000197056	1.37786e-05	down	-5.15517
218644_at	PLEK2	4.99276e-06	1.14238e-07	down	-5.15211
218379_at	RBM7	5.91073e-05	2.84212e-06	up	5.14964
242431_at		0.0173006	0.00431217	up	5.1485
210510_s_at	NRP1	9.51324e-07	1.28757e-08	down	-5.14787
233076_at	JAKMIP3	3.91412e-08	1.78256e-10	up	5.14629
206288_at	PGGT1B	2.25605e-07	2.00125e-09	up	5.14512
243061_at	C14orf23	3.10001e-05	1.23377e-06	up	5.14298
223218_s_at	NFKBIZ	0.000393964	3.37652e-05	down	-5.14027
229323_at	LOC387723	5.24239e-06	1.21579e-07	up	5.13932
226223_at		3.83247e-05	1.60939e-06	up	5.13473
215058_at	DENND5B	0.000716492	7.25469e-05	up	5.13367
204862_s_at	NME3	7.30891e-05	3.72831e-06	up	5.13053
212608_s_at		0.000449393	3.99049e-05	up	5.12851
226272_at	RCAN3	0.000189083	1.29998e-05	up	5.12828
205168_at	DDR2	0.000163142	1.07269e-05	down	-5.12558
203798_s_at	VSNL1	1.94375e-05	6.68359e-07	up	5.12305
41037_at	TEAD4	0.000123108	7.43265e-06	down	-5.11522
201200_at	CREG1	3.33186e-06	6.52661e-08	down	-5.11445
228144_at	ZNF300	1.99496e-05	6.90709e-07	up	5.11372
206806_at	DGKI	5.00132e-05	2.28867e-06	down	-5.11112
204235_s_at	GULP1	0.00314674	0.000482031	up	5.11108
230447_at	C6orf168	6.8867e-06	1.71805e-07	up	5.1104
209732_at	CLEC2B	4.12023e-06	8.79434e-08	up	5.10701
1553997_a_at	ASPHD1	5.50043e-05	2.57341e-06	down	-5.10299
244864_at		1.82059e-05	6.1008e-07	down	-5.10168
238692_at	BTBD11	0.000306339	2.44735e-05	down	-5.10042
218959_at	HOXC10	3.63384e-05	1.50205e-06	up	5.09994
228323_at	CASC5	4.64309e-05	2.07463e-06	down	-5.0999
205280_at	GLRB	0.00132468	0.000159868	up	5.09591
219181_at	LIPG	0.0168081	0.00415783	up	5.09459
232244_at	KIAA1161	0.00150003	0.000187768	up	5.09264
225171_at	ARHGAP18	0.000654009	6.44978e-05	up	5.08912
204595_s_at	STC1	0.000513394	4.74097e-05	down	-5.07611
202838_at	FUCA1	1.28758e-05	3.89513e-07	up	5.07524
200879_s_at	EPAS1	0.00948389	0.00197327	down	-5.07466
212202_s_at	TMEM87A	0.000400153	3.44786e-05	up	5.0746
213816_s_at	MET	2.45909e-05	9.05556e-07	down	-5.07252
211475_s_at	BAG1	1.83895e-05	6.18869e-07	up	5.07214
229809_at	POU6F1	9.0638e-05	4.92852e-06	up	5.06759
208368_s_at	BRCA2	0.000953346	0.000104271	down	-5.06613
215719_x_at	FAS	0.00349493	0.000548258	down	-5.06319
203217_s_at	ST3GAL5	1.12444e-05	3.2412e-07	up	5.06229
228909_at	LOC642852	0.000196488	1.37002e-05	up	5.06126
212551_at	CAP2	0.000101304	5.71974e-06	up	5.06027
1555471_a_at	FMN2	0.000130953	8.05715e-06	up	5.05397
1553535_a_at	RANGAP1	0.000278033	2.16477e-05	down	-5.05086
217922_at		4.16886e-06	8.93627e-08	up	5.04897
223089_at	VEZT	0.000361273	3.01969e-05	up	5.0485
211713_x_at	KIAA0101	0.000255021	1.92636e-05	down	-5.04331
1555973_at		2.06747e-07	1.73943e-09	up	5.04296
229513_at	STRBP	0.000927125	0.000100742	up	5.04203
214701_s_at	FN1	0.0363865	0.0115518	down	-5.04202
205024_s_at	RAD51	1.77004e-06	2.92404e-08	down	-5.04091
222369_at	NAT11	0.00231906	0.000326725	up	5.03977
230908_at	TACR1	0.000380079	3.22485e-05	up	5.03797
219561_at	COPZ2	1.16027e-05	3.3869e-07	down	-5.03761
235428_at		0.00213262	0.000293711	up	5.03623
242093_at	SYTL5	0.0017366	0.000227163	up	5.03348
[truncated: 17,366 more rows]
