# Supplementary material for: Recapitulation of Tumor Heterogeneity and Molecular Signatures in a 3D Brain Cancer Model with Decreased Sensitivity to Histone Deacetylase Inhibition
Source: PLoS One. 2012 Dec 18;7(12):e52335. doi: 10.1371/journal.pone.0052335 (PMC3525561; doi:10.1371/journal.pone.0052335)
Supplement: Table S6 — Full list genes differentially expressed KNS42 3d vs. 2d. (XLS) [file pone.0052335.s007.xls]

## Sheet: Sheet1
Probe Set ID	Gene Symbol	Corrected p-value	p-value	regulation	FCAbsolute
205476_at	CCL20	0.00458603	2.05839e-06	up	619.685
202859_x_at	IL8	0.00577185	6.25e-06	up	210.716
211506_s_at	IL8	0.00540831	5.14371e-06	up	159.926
1554997_a_at	PTGS2	0.0103907	3.50705e-05	up	88.6057
215078_at	SOD2	0.00436449	7.81537e-07	up	72.3153
205767_at	EREG	0.00969866	2.96148e-05	up	70.4722
39402_at	IL1B	0.00466685	3.67032e-06	up	65.916
209395_at	CHI3L1	0.0124092	5.30044e-05	up	64.7077
204748_at	PTGS2	0.00458603	3.26922e-06	up	49.5491
205067_at	IL1B	0.00540831	5.05447e-06	up	42.2367
209396_s_at	CHI3L1	0.0100552	3.24864e-05	up	42.1958
206026_s_at	TNFAIP6	0.00783698	1.66657e-05	up	32.1176
209774_x_at	CXCL2	0.00458603	2.08614e-06	up	31.694
204475_at	MMP1	0.0321221	0.000643659	up	29.7065
206025_s_at	TNFAIP6	0.0118075	4.84427e-05	up	25.9995
210118_s_at	IL1A	0.00458603	3.1908e-06	up	24.4044
201631_s_at	IER3	0.00961523	2.60267e-05	up	20.9432
206924_at	IL11	0.0205184	0.000208717	up	20.8988
205207_at	IL6	0.0105891	3.66043e-05	up	20.6724
207299_s_at	GRM1	0.0130562	6.93571e-05	up	20.1867
225645_at	EHF	0.016089	0.000115352	up	20.0818
204614_at	SERPINB2	0.0142378	8.78508e-05	up	16.435
214038_at	CCL8	0.0126851	6.00905e-05	up	15.9769
1555854_at		0.0260101	0.000390019	up	15.4413
227099_s_at	LOC387763	0.027766	0.000462639	up	15.2821
1554018_at	GPNMB	0.0278992	0.000468352	up	13.648
201859_at	SRGN	0.00475227	4.03742e-06	up	13.3139
217388_s_at	KYNU	0.0118075	4.81882e-05	up	13.2847
206569_at	IL24	0.0135711	7.86455e-05	up	12.5802
206211_at	SELE	0.00334242	1.83398e-07	up	12.2791
226757_at	IFIT2	0.0241813	0.000316543	up	11.6219
229152_at	C4orf7	0.0181984	0.000146937	up	11.3935
212190_at	SERPINE2	0.0103773	3.43538e-05	up	10.4405
1553147_at	RANBP3L	0.0155262	0.000106773	up	10.4379
235737_at	TSLP	0.0383632	0.000931452	up	10.1206
202638_s_at	ICAM1	0.00571721	5.85576e-06	up	10.1092
207850_at	CXCL3	0.0193372	0.000180261	up	9.62096
202357_s_at	C2 /// CFB	0.00458603	1.83156e-06	up	9.60412
209875_s_at	SPP1	0.0484394	0.00152629	up	9.56462
205890_s_at	GABBR1 /// UBD	0.0086735	1.91951e-05	up	9.28746
206935_at	PCDH8	0.0130562	6.53177e-05	up	9.02975
213744_at	ATRNL1	0.0108486	4.0582e-05	up	8.89239
236278_at		0.0130562	6.94819e-05	up	8.83305
205749_at	CYP1A1	0.0124092	5.58419e-05	up	8.69739
202902_s_at	CTSS	0.0164114	0.000121056	up	8.66224
210538_s_at	BIRC3	0.0431943	0.00122686	up	8.63594
221458_at	HTR1F	0.00657005	1.00939e-05	up	8.54937
202637_s_at	ICAM1	0.00459194	3.45979e-06	up	8.54282
217626_at	AKR1C1	0.0329536	0.000680487	up	8.48477
202901_x_at	CTSS	0.0167201	0.000127216	up	8.34784
221477_s_at	SOD2	0.00753566	1.45828e-05	up	8.21378
201141_at	GPNMB	0.0366287	0.000854011	up	8.1372
202948_at	IL1R1	0.0276114	0.000450114	up	8.0753
217767_at	C3	0.0205785	0.000214784	up	7.81948
216841_s_at	SOD2	0.0131726	7.26654e-05	up	7.68807
215223_s_at	SOD2	0.0208957	0.000227398	up	7.5467
217502_at	IFIT2	0.0198985	0.000194427	up	7.4219
220301_at	CCDC102B	0.0130562	6.75615e-05	up	7.41395
209785_s_at	PLA2G4C	0.0302915	0.000556139	up	7.38812
231779_at	IRAK2	0.0139444	8.56941e-05	up	7.35157
230117_at	VSTM2A	0.00458603	2.87354e-06	up	7.2212
213745_at	ATRNL1	0.0090519	2.23504e-05	up	7.14558
228702_at	FLJ43663	0.0245412	0.000329011	up	7.13764
229057_at	SCN2A	0.00656215	9.84172e-06	up	7.05709
202643_s_at	TNFAIP3	0.0206495	0.000216786	up	7.01697
205681_at	BCL2A1	0.0139352	8.4998e-05	up	6.94548
205234_at	SLC16A4	0.0224799	0.000266233	up	6.78984
203153_at	IFIT1	0.0304145	0.000564066	up	6.64734
223529_at	SYT4	0.0166779	0.000126399	up	6.64711
201272_at	AKR1B1	0.00913395	2.36588e-05	up	6.6304
204472_at	GEM	0.0124092	5.74738e-05	up	6.3869
205374_at	SLN	0.0386261	0.00094952	up	6.38553
208747_s_at	C1S	0.0143891	9.12307e-05	up	6.25756
221872_at	RARRES1	0.0193372	0.000179653	up	6.17885
201858_s_at	SRGN	0.0225672	0.000270353	up	6.16475
236308_at	VSTM2A	0.0188014	0.00015794	up	6.08887
206950_at	SCN9A	0.0330069	0.000688088	up	5.98642
1556378_a_at	LOC440896	0.00998303	3.16344e-05	up	5.96642
202644_s_at	TNFAIP3	0.00998303	3.17704e-05	up	5.93376
204035_at	SCG2	0.00458603	3.32821e-06	up	5.88445
212657_s_at	IL1RN	0.0131894	7.3576e-05	up	5.75941
244530_at		0.0407637	0.00106833	up	5.70264
1554530_at	VSTM2A	0.0265743	0.000401469	up	5.65213
236738_at	LOC401097	0.00969866	2.76943e-05	up	5.64498
225975_at	PCDH18	0.0124092	5.7329e-05	up	5.63807
227834_at	TXLNB	0.00891138	2.07024e-05	up	5.62068
205680_at	MMP10	0.031896	0.00062664	up	5.61724
237521_x_at		0.0124092	5.446e-05	up	5.56248
1556427_s_at	LRRN4CL	0.00458603	2.63187e-06	up	5.40491
218404_at	SNX10	0.0194676	0.000184795	up	5.36004
228057_at	DDIT4L	0.00540831	5.09269e-06	up	5.28303
232617_at	CTSS	0.0280863	0.000473113	up	5.27515
231098_at		0.0364556	0.000841462	up	5.22253
212067_s_at	C1R	0.00993785	3.10813e-05	up	5.17651
228143_at	CP	0.0428076	0.00119634	up	5.10675
229427_at	SEMA5A	0.00969866	2.8562e-05	up	5.04852
228155_at	C10orf58	0.031896	0.00062599	up	4.9541
203868_s_at	VCAM1	0.043145	0.00122076	up	4.90618
230729_at		0.0339699	0.000726307	up	4.89706
239108_at	FAR2	0.0399123	0.00101834	up	4.89521
231911_at	ERMN	0.0324191	0.000659193	up	4.89219
229199_at	SCN9A	0.0383632	0.000927431	up	4.88938
210260_s_at	TNFAIP8	0.025821	0.000382062	up	4.84187
209277_at	TFPI2	0.0306209	0.000580775	up	4.78277
206392_s_at	RARRES1	0.00458603	2.83952e-06	up	4.74647
225207_at	PDK4	0.0450287	0.00131879	up	4.69244
218507_at	C7orf68	0.0228908	0.000278835	up	4.68147
1556209_at	CLEC2B	0.045889	0.00137814	up	4.63241
226756_at		0.0271965	0.00042828	up	4.62957
219424_at	EBI3	0.0270012	0.000418538	up	4.62859
232504_at	LOC285628	0.00775754	1.55816e-05	up	4.58914
205844_at	VNN1	0.0396039	0.0010054	up	4.51575
228964_at	PRDM1	0.0108242	3.93968e-05	up	4.49164
208296_x_at	TNFAIP8	0.0265114	0.000400034	up	4.48434
218627_at	DRAM	0.0112611	4.32526e-05	up	4.46877
210663_s_at	KYNU	0.0143592	8.95564e-05	up	4.40079
202627_s_at	SERPINE1	0.0188014	0.000159142	up	4.39806
237322_at	MIAT	0.00783698	1.63318e-05	up	4.39112
228728_at	C7orf58	0.0124092	5.69372e-05	up	4.3894
1558834_s_at	C1orf62	0.0108867	4.10179e-05	up	4.38493
204273_at	EDNRB	0.00685645	1.07801e-05	up	4.32853
230383_x_at		0.0303748	0.000559331	up	4.32779
209602_s_at	GATA3	0.0414599	0.00112071	up	4.32136
216594_x_at	AKR1C1	0.0351826	0.000782379	up	4.29465
1554452_a_at	C7orf68	0.0251467	0.000355999	up	4.28085
202761_s_at	SYNE2	0.00969866	2.93108e-05	up	4.27454
225835_at	SLC12A2	0.0344154	0.000742756	up	4.23871
211653_x_at	AKR1C2	0.0484955	0.00153248	up	4.23854
239352_at	SLC6A15	0.0450287	0.00132881	up	4.21785
232035_at	HIST1H4B	0.0185116	0.000152698	up	4.20441
1558527_at	LOC100132707	0.0162447	0.000117954	up	4.20363
223723_at	MFI2	0.0272151	0.000430065	up	4.19289
244260_at		0.0160621	0.000112809	up	4.17497
1559255_a_at		0.00577185	6.6234e-06	up	4.16116
229450_at	IFIT3	0.0449884	0.00131569	up	4.13064
227176_at	SLC2A13	0.0323534	0.000655056	up	4.12091
201893_x_at	DCN	0.048665	0.00154765	up	4.1103
235911_at		0.0221821	0.000253974	up	4.10235
219197_s_at	SCUBE2	0.0495035	0.00158991	up	4.08078
214282_at		0.043145	0.00122045	up	4.00283
215071_s_at	HIST1H2AC	0.0165545	0.000123898	up	3.98719
223588_at	THAP2	0.0193372	0.000181966	up	3.89616
229944_at	OPRK1	0.0231211	0.000288314	up	3.88515
211896_s_at	DCN	0.0295975	0.000528343	up	3.87796
213169_at	SEMA5A	0.00969866	2.72287e-05	up	3.8545
210285_x_at	WTAP	0.0207676	0.000219166	up	3.82781
1569796_s_at	ATRNL1	0.028073	0.000471922	up	3.81213
203137_at	WTAP	0.0103907	3.51583e-05	up	3.75189
209604_s_at	GATA3	0.0312508	0.000607101	up	3.74566
1563834_a_at	C1orf62	0.0193372	0.000182008	up	3.7183
225817_at	CGNL1	0.0306867	0.000588235	up	3.6941
210145_at	PLA2G4A	0.0231211	0.000287331	up	3.68327
230660_at	SERTAD4	0.0425347	0.00117238	up	3.67027
232116_at	GRHL3	0.00586041	8.14615e-06	up	3.61554
229327_s_at		0.0450329	0.00133064	up	3.6133
1553313_s_at	SLC5A3	0.00577185	6.65586e-06	up	3.60791
229256_at	PGM2L1	0.0319168	0.000630455	up	3.59867
209795_at	CD69	0.027766	0.000460019	up	3.59244
1556158_at	FAM154B	0.037047	0.000874455	up	3.57013
220753_s_at	CRYL1	0.0393257	0.000989706	up	3.56582
223599_at	TRIM6	0.0131726	7.32412e-05	up	3.52648
226682_at	RORA	0.023532	0.000294345	up	3.51075
204404_at	SLC12A2	0.0258283	0.000384225	up	3.48564
208581_x_at	MT1X	0.0274535	0.000442369	up	3.48409
226281_at	DNER	0.0130562	6.93847e-05	up	3.48025
218876_at	TPPP3	0.0448554	0.00130772	up	3.4546
235681_at		0.0144382	9.26898e-05	up	3.44223
205841_at	JAK2	0.0289214	0.000505166	up	3.43067
208180_s_at	HIST1H4B	0.0192882	0.000170753	up	3.41919
215501_s_at	DUSP10	0.00145483	5.32173e-08	up	3.41566
227148_at	PLEKHH2	0.0240476	0.000311399	up	3.41288
209987_s_at	ASCL1	0.0154135	0.000104944	up	3.39583
217738_at	NAMPT	0.0321221	0.000645584	up	3.37899
228772_at	HNMT	0.0484955	0.00153487	up	3.37735
207103_at	KCND2	0.0414622	0.0011231	up	3.3692
205842_s_at	JAK2	0.00906677	2.30018e-05	up	3.35182
231348_s_at	LMO3	0.0143874	9.02626e-05	up	3.34298
209204_at	LMO4	0.0193372	0.000181502	up	3.32931
1553288_a_at	C7orf51	0.0193372	0.000181576	up	3.32051
241745_at		0.0134203	7.53549e-05	up	3.31589
224919_at	MRPS6	0.0149486	9.96336e-05	up	3.30156
205092_x_at	ZBTB1	0.0462168	0.00139644	up	3.30088
215298_at		0.0349926	0.000773132	up	3.29596
223441_at	SLC17A5	0.0103907	3.49701e-05	up	3.2839
235352_at		0.0465874	0.0014102	up	3.28314
205352_at	SERPINI1	0.016089	0.00011521	up	3.25562
212942_s_at	KIAA1199	0.0383632	0.000927995	up	3.24483
204259_at	MMP7	0.0494958	0.00158791	up	3.23968
218976_at	DNAJC12	0.0321221	0.000641443	up	3.23192
204260_at	CHGB	0.0375186	0.000892788	up	3.19291
220991_s_at	RNF32	0.024841	0.000346206	up	3.17192
205659_at	HDAC9	0.0238384	0.000301277	up	3.16787
218031_s_at	FOXN3	0.0114869	4.55904e-05	up	3.15758
230837_at	LOC647500	0.0130562	6.64341e-05	up	3.15756
238725_at	IRF1	0.00906677	2.30504e-05	up	3.13065
232429_at		0.0196412	0.000190004	up	3.13023
229060_at	YPEL2	0.00577185	6.15085e-06	up	3.12131
224707_at	C5orf32	0.00783698	1.66673e-05	up	3.11739
237690_at	GPR115	0.00902758	2.14648e-05	up	3.11401
235252_at	KSR1	0.00969866	2.91564e-05	up	3.07091
229378_at	STOX1	0.0450287	0.00132477	up	3.0319
203159_at	GLS	0.0293734	0.000519372	up	3.03133
217997_at	PHLDA1	0.0201562	0.000199575	up	3.02723
217165_x_at	MT1F	0.018569	0.00015351	up	3.02585
222494_at	FOXN3	0.0274379	0.000441113	up	3.02088
221563_at	DUSP10	0.00458603	2.7788e-06	up	3.01547
202834_at	AGT	0.0426096	0.00118457	up	3.01545
213385_at	CHN2	0.0296083	0.000531243	up	2.99871
220615_s_at	FAR2	0.0166191	0.000125536	up	2.96935
236640_at	LOC399959	0.0401633	0.00102768	up	2.96711
210630_s_at	RAD52	0.0293734	0.000520204	up	2.9577
1558692_at	C1orf85	0.024841	0.000345965	up	2.95181
223721_s_at	DNAJC12	0.0300893	0.000547579	up	2.94986
238067_at	TBC1D8B	0.0487311	0.00155212	up	2.94911
213988_s_at	SAT1	0.00656215	9.80395e-06	up	2.9334
237054_at	ENPP5	0.0247195	0.000337515	up	2.93069
218699_at	RAB7L1	0.0146239	9.41493e-05	up	2.91137
221808_at	RAB9A	0.0124092	5.4514e-05	up	2.9078
206926_s_at	IL11	0.0423436	0.00116176	up	2.89958
204647_at	HOMER3	0.0393811	0.000994891	up	2.89071
229831_at	CNTN3	0.0130562	7.03905e-05	up	2.88564
230773_at		0.00458603	2.64467e-06	up	2.88506
227803_at	ENPP5	0.0341496	0.000732422	up	2.88262
229414_at	PITPNC1	0.0153827	0.00010438	up	2.87624
242907_at		0.0474033	0.0014635	up	2.87267
207144_s_at	CITED1	0.0453751	0.00134694	up	2.86627
236433_at		0.0367018	0.000859228	up	2.86533
209160_at	AKR1C3	0.00783698	1.69138e-05	up	2.85896
238417_at	PGM2L1	0.0408889	0.00108364	up	2.8559
218999_at	TMEM140	0.0276666	0.000453899	up	2.84578
239672_at		0.0484955	0.00153044	up	2.84157
232968_at	FANK1	0.0363503	0.00082843	up	2.83912
230104_s_at	TPPP	0.010643	3.78647e-05	up	2.83144
209700_x_at	PDE4DIP	0.0133218	7.45581e-05	up	2.8299
204745_x_at	MT1G	0.0407637	0.00107229	up	2.82394
219771_at	TBC1D8B	0.0383897	0.000936544	up	2.80452
204417_at	GALC	0.00728848	1.21308e-05	up	2.80312
229053_at	SYT17	0.0138493	8.3155e-05	up	2.79907
210731_s_at	LGALS8	0.0321221	0.000642114	up	2.78643
211813_x_at	DCN	0.0447581	0.00129342	up	2.78256
210229_s_at	CSF2	0.0270479	0.000422951	up	2.77252
228977_at	LOC729680	0.0153827	0.000104304	up	2.76689
203397_s_at	GALNT3	0.037581	0.00089837	up	2.75933
202023_at	EFNA1	0.00969866	2.97086e-05	up	2.7565
230561_s_at	C2orf67	0.0285069	0.000492957	up	2.73729
205765_at	CYP3A5	0.0165545	0.000124442	up	2.72572
208579_x_at	H2BFS	0.0251778	0.000360465	up	2.72566
219263_at	RNF128	0.0325277	0.00066394	up	2.72197
224946_s_at	CCDC115	0.0160079	0.000111843	up	2.71049
224414_s_at	CARD6	0.0177604	0.000139746	up	2.70833
235831_at		0.0188014	0.000161209	up	2.70575
1553654_at	SYT14	0.0218146	0.000244978	up	2.69537
228630_at	ZNF84	0.0272377	0.000431533	up	2.69265
219648_at	MREG	0.0124092	5.74909e-05	up	2.69068
204698_at	ISG20	0.031896	0.000628295	up	2.69012
213372_at	PAQR3	0.023532	0.000294392	up	2.68835
1564475_s_at	LOC728723	0.0153126	0.000102887	up	2.68059
239764_at		0.045889	0.00137684	up	2.67853
205647_at	RAD52	0.0393811	0.000994673	up	2.67612
219449_s_at	TMEM70	0.0192135	0.000167624	up	2.66977
220047_at	SIRT4	0.0240085	0.000310014	up	2.66819
207442_at	CSF3	0.0223313	0.000259357	up	2.65646
223497_at	FAM135A	0.0205184	0.000209812	up	2.64748
1555742_at		0.0193372	0.000182337	up	2.64373
1554982_a_at	C9orf11	0.0208556	0.000223233	up	2.64041
232692_at	TDRD6	0.0369432	0.000868258	up	2.63293
210944_s_at	CAPN3	0.00783698	1.6519e-05	up	2.63072
219209_at	IFIH1	0.0251778	0.000360075	up	2.62984
205013_s_at	ADORA2A	0.0251467	0.000356976	up	2.62487
236527_at		0.0306867	0.000588973	up	2.60871
203227_s_at	TSPAN31	0.0360194	0.000815583	up	2.60629
223250_at	KLHL7	0.0400458	0.00102273	up	2.59702
214748_at	N4BP2L2	0.0407637	0.00106466	up	2.59404
244403_at	CRB1	0.0304287	0.000564885	up	2.59192
236587_at		0.0471519	0.00144798	up	2.59055
232361_s_at	EHF	0.0303748	0.000558467	up	2.58798
212501_at	CEBPB	0.00436449	6.13493e-07	up	2.587
1568574_x_at	SPP1	0.0448153	0.00130573	up	2.58684
213629_x_at	MT1F	0.017107	0.000131412	up	2.58405
201502_s_at	NFKBIA	0.0364939	0.000846226	up	2.58152
235962_at		0.0329575	0.000682756	up	2.57129
225057_at	SLC15A4	0.0130562	6.98376e-05	up	2.56721
240011_at	TTBK2	0.0143891	9.18684e-05	up	2.56212
242665_at	FMNL2	0.033815	0.000718818	up	2.56065
222662_at	PPP1R3B	0.00753566	1.39328e-05	up	2.55985
228528_at		0.0407637	0.00107267	up	2.55912
235650_at	FLJ23834	0.0207105	0.000217806	up	2.55304
242649_x_at	C15orf21	0.0193372	0.000179478	up	2.53956
228221_at	SLC44A3	0.020997	0.000228884	up	2.5389
231166_at	GPR155	0.0475172	0.00146962	up	2.52765
214597_at	SSTR2	0.0274582	0.000442947	up	2.52134
218974_at	SOBP	0.00625698	8.92628e-06	up	2.51622
232589_at		0.0282087	0.000481427	up	2.51389
203865_s_at	ADARB1	0.0454971	0.00136088	up	2.51166
214177_s_at	PBXIP1	0.00577185	6.61907e-06	up	2.51149
213463_s_at	FAM149B1	0.0216753	0.000241034	up	2.51019
219622_at	RAB20	0.0251778	0.000362873	up	2.51002
214234_s_at	CYP3A5	0.0403288	0.0010409	up	2.50144
201848_s_at	BNIP3	0.048287	0.00151374	up	2.48976
227168_at	MIAT	0.0450287	0.00132495	up	2.4884
201847_at	LIPA	0.0386503	0.000952275	up	2.48492
222881_at	HPSE	0.0245081	0.000326326	up	2.48417
229630_s_at	WTAP	0.0231211	0.000285108	up	2.48057
224565_at	NCRNA00084	0.0226101	0.000272521	up	2.46726
212558_at	SPRY1	0.0484217	0.00152266	up	2.46531
205579_at	HRH1	0.0240564	0.000312392	up	2.46008
227231_at	KIAA1211	0.0100552	3.25518e-05	up	2.45215
203217_s_at	ST3GAL5	0.0425347	0.00117175	up	2.44868
218322_s_at	ACSL5	0.043145	0.0012186	up	2.43622
201117_s_at	CPE	0.0306867	0.00058899	up	2.43585
1557286_at		0.00783698	1.67802e-05	up	2.43077
240069_at		0.00969866	2.98011e-05	up	2.42814
205123_s_at	TMEFF1	0.00540831	5.07273e-06	up	2.42713
201732_s_at	CLCN3	0.0142378	8.80176e-05	up	2.42285
204112_s_at	HNMT	0.00891138	2.08527e-05	up	2.42238
244293_at	UQCRB	0.0268132	0.000409983	up	2.42144
223434_at	GBP3	0.00545895	5.29171e-06	up	2.41298
202872_at	ATP6V1C1	0.00458603	3.35512e-06	up	2.40911
208078_s_at	SIK1	0.0431943	0.00122576	up	2.40323
235567_at	RORA	0.0454971	0.0013619	up	2.40002
235492_at	RNF217	0.0427186	0.00119229	up	2.39946
227804_at	TLCD1	0.0213262	0.0002355	up	2.39719
209949_at	NCF2	0.0426096	0.00118132	up	2.39382
1555851_s_at	SEPW1	0.0129336	6.31598e-05	up	2.38576
204070_at	RARRES3	0.0409279	0.00108835	up	2.38087
220161_s_at	EPB41L4B	0.0344869	0.000745174	up	2.38028
218706_s_at	GRAMD3	0.0321221	0.000644091	up	2.37948
243179_at	LOC100130360	0.0416574	0.00113067	up	2.37594
209806_at	HIST1H2BK	0.0143891	9.12377e-05	up	2.37071
202967_at	GSTA4	0.0404274	0.0010474	up	2.36809
218983_at	C1RL	0.0251467	0.000355435	up	2.3658
200921_s_at	BTG1	0.0276309	0.000452304	up	2.36164
206461_x_at	MT1H	0.0243515	0.000321569	up	2.35108
203157_s_at	GLS	0.012794	6.17599e-05	up	2.35036
1564474_at	LOC728723	0.0352494	0.000785899	up	2.3499
222126_at	AGFG2	0.0450287	0.00132924	up	2.33916
209939_x_at	CFLAR	0.0473062	0.0014579	up	2.33726
243354_at	HYDIN /// HYDIN2	0.0139352	8.53825e-05	up	2.33624
208892_s_at	DUSP6	0.0364556	0.000839601	up	2.33408
1557195_at		0.0249985	0.000350671	up	2.32835
1568877_a_at	ACBD5	0.0407637	0.00107361	up	2.31833
226001_at	KLHL5	0.0285069	0.000493755	up	2.31729
222248_s_at	SIRT4	0.0302915	0.000556029	up	2.31691
224071_at	IL20	0.024535	0.00032848	up	2.31199
201194_at	SEPW1	0.00657005	1.00886e-05	up	2.30576
212944_at	SLC5A3	0.0411794	0.0011049	up	2.30351
205022_s_at	FOXN3	0.00692227	1.13947e-05	up	2.30059
220117_at	ZNF385D	0.0386602	0.000955987	up	2.29947
1554985_at	ZNF396	0.0296988	0.000535604	up	2.29566
242006_at	LCA5	0.0130562	6.75802e-05	up	2.29512
210845_s_at	PLAUR	0.0356416	0.000805726	up	2.28908
1570388_a_at	LOC440896	0.0363503	0.000828287	up	2.28879
210592_s_at	SAT1	0.00685645	1.08579e-05	up	2.28619
201976_s_at	MYO10	0.0130562	6.64092e-05	up	2.28102
229888_at	C12orf60	0.0407637	0.00107117	up	2.28088
229943_at	TRIM13	0.0447879	0.00130158	up	2.27377
244261_at	IL28RA	0.0196412	0.000188642	up	2.26767
209948_at	KCNMB1	0.0250769	0.000353164	up	2.26491
227370_at	FAM171B	0.00775754	1.57492e-05	up	2.26308
205580_s_at	HRH1	0.0164073	0.000120335	up	2.25727
212845_at	SAMD4A	0.00458603	2.50494e-06	up	2.25112
222150_s_at	PION	0.0329538	0.000681678	up	2.25021
219435_at	C17orf68	0.0270012	0.000417817	up	2.24875
1553998_at	DMRTC1 /// DMRTC1B	0.0256413	0.000378465	up	2.24775
228718_at	ZNF44	0.0426096	0.00118279	up	2.24341
226814_at	ADAMTS9	0.0427186	0.00119051	up	2.24124
220459_at	MCM3APAS	0.0401979	0.00103518	up	2.23348
226636_at	PLD1	0.0270479	0.000423961	up	2.22793
223058_at	FAM107B	0.021449	0.000237863	up	2.22754
205618_at	PRRG1	0.017278	0.000135569	up	2.22667
206512_at	ZRSR1	0.0108449	4.00487e-05	up	2.22417
218285_s_at	BDH2	0.0337929	0.00071387	up	2.21983
225512_at	ZBTB38	0.0128183	6.21282e-05	up	2.21719
212445_s_at	NEDD4L	0.0449884	0.00131571	up	2.21381
241834_at	IPW	0.0395818	0.00100339	up	2.20877
223249_at	CLDN12	0.0223019	0.000258107	up	2.20342
205337_at	DCT	0.033815	0.000720026	up	2.20251
229146_at	C7orf31	0.0270479	0.000421997	up	2.20159
217858_s_at	ARMCX3	0.0122946	5.19443e-05	up	2.19843
239417_x_at	C6orf52	0.00753566	1.40259e-05	up	2.19768
1553158_at	C3orf34	0.0239805	0.000307898	up	2.19516
229189_s_at		0.0259489	0.000388225	up	2.18769
204137_at	GPR137B	0.0205184	0.000212529	up	2.18009
205403_at	IL1R2	0.0484955	0.00153536	up	2.17912
227091_at	CCDC146	0.0306867	0.000586088	up	2.17619
243943_x_at	C6orf52	0.0239805	0.000305797	up	2.17532
222793_at	DDX58	0.031896	0.000627037	up	2.16949
1568865_at	FNTB	0.0383632	0.00093011	up	2.1681
223278_at	GJB2	0.0130562	6.56908e-05	up	2.16544
218532_s_at	FAM134B	0.0326927	0.000667905	up	2.16243
212286_at	ANKRD12	0.0447879	0.00129664	up	2.15763
209992_at	PFKFB2	0.0383632	0.000928774	up	2.15507
229190_at		0.0386503	0.0009537	up	2.15046
1564736_a_at	CASP12	0.0143874	9.02307e-05	up	2.1347
209102_s_at	HBP1	0.0306867	0.000585055	up	2.13152
225185_at	MRAS	0.0383844	0.000933721	up	2.12317
201171_at	ATP6V0E1	0.0177604	0.000140004	up	2.11981
214222_at	DNAH7	0.0450287	0.00132686	up	2.11963
203226_s_at	TSPAN31	0.0192882	0.000172312	up	2.11364
229170_s_at	TTC18	0.0231211	0.000285873	up	2.11209
205691_at	SYNGR3	0.0304611	0.000571321	up	2.11128
233177_s_at	PNKD	0.0409279	0.00108917	up	2.11014
236439_at		0.0410035	0.00109343	up	2.10931
236054_at		0.0242374	0.000318558	up	2.10882
201552_at	LAMP1	0.00969866	2.89178e-05	up	2.10726
220091_at	SLC2A6	0.0329575	0.000683538	up	2.10395
226248_s_at	KIAA1324	0.0330069	0.000689225	up	2.09729
1552825_at	ZNF396	0.0319362	0.000632125	up	2.09575
222592_s_at	ACSL5	0.0135711	7.82384e-05	up	2.08532
226022_at	SASH1	0.016089	0.000115049	up	2.08525
209960_at	HGF	0.0130562	6.80705e-05	up	2.08377
45288_at	ABHD6	0.0383632	0.000930648	up	2.08057
218191_s_at	LMBRD1	0.022501	0.000267501	up	2.08022
236180_at		0.0198985	0.000194716	up	2.08009
202336_s_at	PAM	0.00475227	4.08517e-06	up	2.07974
228367_at	ALPK2	0.0124092	5.34311e-05	up	2.07822
219247_s_at	ZDHHC14	0.0296988	0.000535564	up	2.07506
230652_at	ARAF	0.0419315	0.00114425	up	2.07471
226051_at	SELM	0.027766	0.000461889	up	2.07376
223220_s_at	PARP9	0.00577185	6.38853e-06	up	2.07021
230451_at		0.0407637	0.00107176	up	2.06865
219313_at	GRAMD1C	0.0449884	0.00131453	up	2.06582
1556180_at	LOC729678	0.0486447	0.00154427	up	2.06166
218043_s_at	AZI2	0.0323534	0.000654532	up	2.05972
201172_x_at	ATP6V0E1	0.0287225	0.000499065	up	2.05801
217995_at	SQRDL	0.0118075	4.79152e-05	up	2.05717
227964_at	FRMD8	0.0364556	0.000838573	up	2.05072
240106_at	GNPTAB	0.0205184	0.000207571	up	2.04986
219284_at	HSPBAP1	0.0381729	0.000917405	up	2.04367
222692_s_at	FNDC3B	0.0127006	6.06464e-05	up	2.04032
227594_at	ZMYM6	0.0447879	0.00130221	up	2.03337
200759_x_at	NFE2L1	0.0282087	0.00048367	up	2.03141
204638_at	ACP5	0.030376	0.00056194	up	2.0308
228142_at	UCRC	0.0267056	0.000406384	up	2.02732
230364_at	CHPT1	0.0319362	0.000631984	up	2.02689
240578_at		0.0401784	0.00103027	up	2.02599
201487_at	CTSC	0.0212486	0.000232015	up	2.02036
243413_at	TTC30B	0.0391619	0.000983384	up	2.01919
228946_at	INTU	0.0246998	0.000332304	up	2.01695
214703_s_at	MAN2B2	0.00458603	2.3198e-06	up	2.01378
213068_at	DPT	0.0408895	0.0010844	up	2.01334
242094_at		0.0275742	0.000448348	up	2.01133
224739_at	PIM3	0.0241813	0.000316668	up	2.00987
230055_at	KHDC1	0.027284	0.000436908	up	2.00607
243702_at		0.0181984	0.000147118	up	2.00521
209046_s_at	GABARAPL2	0.0217391	0.000243285	up	2.00422
235475_at	SERP1	0.0171579	0.000133686	up	2.00414
1559116_s_at		0.0105572	3.63008e-05	up	2.00302
227940_at	LOC339803	0.0306867	0.000589319	up	2.00264
208546_x_at	HIST1H2BH	0.00458603	2.25741e-06	up	2.00123
201534_s_at	UBL3	0.0207755	0.000219715	up	1.99659
208893_s_at	DUSP6	0.0472392	0.00145152	up	1.99608
218696_at	EIF2AK3	0.0447879	0.00130368	up	1.99555
239913_at	SLC10A4	0.0115938	4.65021e-05	up	1.99478
1569898_a_at	LOC100132707	0.0136221	7.98041e-05	up	1.99449
205871_at	PLGLB1 /// PLGLB2	0.0225129	0.000268054	up	1.99244
209240_at	OGT	0.0385044	0.000945796	up	1.98803
201735_s_at	CLCN3	0.00577185	6.03236e-06	up	1.98765
226055_at	ARRDC2	0.0130562	7.04447e-05	up	1.98678
231769_at	FBXO6	0.0388597	0.000971582	up	1.98593
210047_at	SLC11A2	0.0225869	0.00027133	up	1.98188
214244_s_at	ATP6V0E1	0.0272632	0.000434815	up	1.98027
218854_at	DSE	0.0498742	0.00161093	up	1.97235
227791_at	SLC9A9	0.00891138	2.09994e-05	up	1.97186
209075_s_at	ISCU	0.0227561	0.000275945	up	1.97082
211475_s_at	BAG1	0.00775754	1.53401e-05	up	1.96857
218544_s_at	RCL1	0.0218833	0.000247145	up	1.96388
208836_at	ATP1B3	0.00753566	1.44437e-05	up	1.96087
1555310_a_at	PAK6	0.0242625	0.000319506	up	1.95922
210985_s_at	SP100	0.0182319	0.000148723	up	1.95728
201125_s_at	ITGB5	0.027766	0.000459648	up	1.95509
205935_at	FOXF1	0.0208957	0.000225792	up	1.95417
219925_at	ZMYM6	0.022416	0.000264165	up	1.95194
227565_at		0.0184198	0.000151603	up	1.94973
204421_s_at	FGF2	0.0478569	0.00148976	up	1.9477
244429_at		0.0391466	0.000980901	up	1.94174
225163_at	FRMD4A	0.0295118	0.000523575	up	1.94101
204385_at	KYNU	0.0310412	0.000600669	up	1.94063
216035_x_at	TCF7L2	0.0188014	0.000159943	up	1.93982
216250_s_at	LPXN	0.0200821	0.00019724	up	1.93907
236289_at		0.0124092	5.539e-05	up	1.93847
210980_s_at	ASAH1	0.0239805	0.000304594	up	1.93815
202387_at	BAG1	0.0106607	3.86067e-05	up	1.93726
201146_at	NFE2L2	0.0453942	0.00135	up	1.937
232360_at	EHF	0.0373062	0.000884296	up	1.9351
220945_x_at	MANSC1	0.030526	0.000577858	up	1.93171
209112_at	CDKN1B	0.00145483	4.45453e-08	up	1.9302
211843_x_at	CYP3A7	0.0420696	0.00114879	up	1.92984
230240_at		0.0213262	0.000233759	up	1.92918
203595_s_at	IFIT5	0.00577185	7.11221e-06	up	1.92747
212420_at	ELF1	0.0377781	0.000904464	up	1.92705
240391_at	NDUFB2	0.0383632	0.000931992	up	1.92702
201722_s_at	GALNT1	0.0272632	0.000433962	up	1.92684
223482_at	TMEM120A	0.0388312	0.00097016	up	1.92497
203455_s_at	SAT1	0.0346247	0.000749173	up	1.92004
235595_at	ARHGEF2	0.0251559	0.000357956	up	1.91903
231103_at		0.0478745	0.00149118	up	1.91893
228824_s_at	PTGR1	0.0386503	0.000953353	up	1.91659
202006_at	PTPN12	0.0179557	0.000143843	up	1.91578
1558293_at	KIAA1107	0.031896	0.000626047	up	1.9103
224928_at	SETD7	0.0240393	0.000310851	up	1.9094
1554588_a_at	TTC30B	0.0460356	0.00138675	up	1.90893
201838_s_at	SUPT7L	0.0382957	0.000923859	up	1.90714
232827_at		0.0192882	0.000172439	up	1.90515
219889_at	FRAT1	0.0269228	0.000413827	up	1.90483
204778_x_at	HOXB7	0.0188854	0.000162689	up	1.89998
238383_at	C6orf58	0.0240051	0.000308975	up	1.89873
1558685_a_at	LOC158960	0.0285069	0.00049309	up	1.89612
229290_at	DAPL1	0.0407637	0.00106736	up	1.89511
1554509_a_at	C10orf97	0.0108486	4.06762e-05	up	1.89091
211924_s_at	PLAUR	0.0310277	0.000599347	up	1.89086
208490_x_at	HIST1H2BF	0.00685645	1.09101e-05	up	1.88811
229034_at	SOBP	0.0157723	0.000109908	up	1.88628
225930_at	NKIRAS1	0.0139352	8.4622e-05	up	1.886
226850_at	SUMF1	0.0130562	6.4714e-05	up	1.88366
222222_s_at	HOMER3	0.033815	0.000721758	up	1.87897
229225_at	NRP2	0.0298361	0.000539696	up	1.87857
37943_at	ZFYVE26	0.0384695	0.000942994	up	1.87612
201738_at	EIF1B	0.0407637	0.00106797	up	1.87341
228150_at	SEC16B	0.0251467	0.000355737	up	1.86928
221009_s_at	ANGPTL4	0.017107	0.000131132	up	1.86898
49452_at	ACACB	0.0342342	0.00073668	up	1.86546
212929_s_at	FAM21A /// FAM21B /// FAM21C /// FAM21D	0.0335451	0.000707373	up	1.8636
214436_at	FBXL2	0.022022	0.000250932	up	1.86322
242984_at	MKLN1	0.0120175	5.03338e-05	up	1.86287
240809_at	C21orf121	0.0437322	0.00125251	up	1.86245
209649_at	STAM2	0.0270479	0.000421733	up	1.85987
242032_at	KIDINS220	0.0384695	0.000942842	up	1.85908
208527_x_at	HIST1H2BE	0.0223391	0.000261082	up	1.85618
209603_at	GATA3	0.0352605	0.000786791	up	1.8526
225550_at	C1orf71	0.0193372	0.000181151	up	1.85158
228008_at		0.0226101	0.000272267	up	1.85019
200758_s_at	NFE2L1	0.0484955	0.00153337	up	1.84785
219603_s_at	ZNF226	0.0383632	0.000932505	up	1.84783
204045_at	TCEAL1	0.0108486	4.04547e-05	up	1.8469
212947_at	SLC9A8	0.0423436	0.00116246	up	1.84353
203038_at	PTPRK	0.0421966	0.00115303	up	1.8411
230278_at		0.027766	0.000461602	up	1.83927
218198_at	DHX32	0.0329575	0.00068509	up	1.83815
203657_s_at	CTSF	0.025596	0.000376272	up	1.83795
205541_s_at	GSPT2	0.0251778	0.000361101	up	1.83736
209917_s_at	TP53TG1	0.0427755	0.00119466	up	1.83646
200760_s_at	ARL6IP5	0.0207124	0.000218204	up	1.83612
213679_at	TTC30A	0.0299825	0.000545087	up	1.83531
224990_at	C4orf34	0.0333642	0.000702372	up	1.83396
209197_at	SYT11	0.0495694	0.00159565	up	1.83303
51146_at	PIGV	0.0422607	0.00115595	up	1.82693
239242_at		0.0245081	0.000326203	up	1.82267
1558930_at	LOC728192	0.0466634	0.00142336	up	1.82242
243036_at	RP4-692D3.1	0.0272151	0.000429597	up	1.81865
239843_at	RIT1	0.0189978	0.000164353	up	1.81831
226354_at	LACTB	0.0364529	0.000836067	up	1.81698
218268_at	TBC1D15	0.024389	0.00032251	up	1.81431
203786_s_at	TPD52L1	0.0270012	0.000419278	up	1.81216
228415_at	AP1S2	0.0319362	0.000633759	up	1.81214
218534_s_at	AGGF1	0.0222872	0.000257072	up	1.81123
209553_at	VPS8	0.00969866	2.87791e-05	up	1.8088
213702_x_at	ASAH1	0.0310819	0.000602751	up	1.80643
222108_at	AMIGO2	0.0269228	0.00041247	up	1.80354
224701_at	PARP14	0.00458603	1.22827e-06	up	1.80269
212397_at	RDX	0.0124438	5.80371e-05	up	1.80081
237206_at	MYOCD	0.0288191	0.000501271	up	1.79953
229285_at	RNASEL	0.0466634	0.00142359	up	1.7983
241817_at	C3orf62	0.0226443	0.000273761	up	1.79481
212774_at	ZNF238	0.0433903	0.00123485	up	1.79417
1561573_at		0.0346738	0.000755309	up	1.79298
226679_at	SLC26A11	0.0282087	0.000483516	up	1.79243
223474_at	C14orf4	0.00577185	6.85323e-06	up	1.79153
200096_s_at	ATP6V0E1	0.025596	0.000376392	up	1.78997
1561666_a_at	KIAA1908	0.0130562	6.49129e-05	up	1.78836
227112_at	TMCC1	0.0306867	0.000582681	up	1.78399
228624_at	TMEM144	0.0347597	0.000758819	up	1.78295
216037_x_at	TCF7L2	0.0241714	0.00031477	up	1.78118
226019_at	OMA1	0.0282087	0.000480135	up	1.78082
236915_at	C4orf47	0.0238384	0.000301207	up	1.77172
232336_at	ZSWIM5	0.0135711	7.73038e-05	up	1.76663
1565162_s_at	MGST1	0.0315174	0.000614719	up	1.76527
213316_at	KIAA1462	0.0246998	0.000332512	up	1.76418
231897_at	PTGR1	0.0382056	0.000920956	up	1.75997
229657_at	THRB	0.0430191	0.00120855	up	1.75725
214946_x_at	FAM21A /// FAM21B /// FAM21C /// FAM21D	0.0247319	0.000341066	up	1.75498
226884_at	LRRN1	0.0188014	0.000160384	up	1.75093
212259_s_at	PBXIP1	0.0498504	0.00160834	up	1.75042
220761_s_at	TAOK3	0.0394399	0.000999071	up	1.74974
212958_x_at	PAM	0.0196412	0.000190416	up	1.74901
219147_s_at	C9orf95	0.0247319	0.00033973	up	1.74782
225842_at	PHLDA1	0.0124092	5.74989e-05	up	1.74683
214150_x_at	ATP6V0E1	0.0198985	0.000195072	up	1.74649
207486_x_at	CHN2	0.0157137	0.000108638	up	1.74276
200748_s_at	FTH1	0.0179557	0.00014361	up	1.74212
1557729_at	LOC100131848	0.0304611	0.000566977	up	1.74145
201553_s_at	LAMP1	0.030376	0.000561116	up	1.74134
217728_at	S100A6	0.0281328	0.000475621	up	1.7401
235174_s_at	LOC100128822	0.0323297	0.000652802	up	1.73951
213073_at	ZFYVE26	0.0222614	0.0002555	up	1.7385
213186_at	DZIP3	0.0484394	0.00152649	up	1.73732
212535_at	MEF2A	0.0218833	0.000247032	up	1.73609
207291_at	PRRG4	0.0366302	0.000856211	up	1.73601
200761_s_at	ARL6IP5	0.0192882	0.000172208	up	1.73596
227040_at	NHLRC3	0.0484955	0.00153455	up	1.73204
201723_s_at	GALNT1	0.0271401	0.000426447	up	1.72888
202626_s_at	LYN	0.020168	0.000202517	up	1.7241
235427_at		0.0207755	0.000221474	up	1.72328
225914_s_at	CAB39L	0.0270012	0.000418763	up	1.72127
201384_s_at	LOC100133166 /// NBR1	0.0467024	0.00142734	up	1.72017
209019_s_at	PINK1	0.0245196	0.000327333	up	1.71763
204447_at	ProSAPiP1	0.0296988	0.000536539	up	1.71732
223949_at	TMPRSS3	0.027263	0.000433316	up	1.71453
217975_at	WBP5	0.0193372	0.000178734	up	1.71237
204800_s_at	DHRS12	0.0460356	0.00138592	up	1.70658
227487_s_at	SERPINE2	0.0302764	0.000554306	up	1.70639
203927_at	NFKBIE	0.0225672	0.00027021	up	1.70565
203335_at	PHYH	0.0251778	0.00036105	up	1.70333
242899_at		0.0337983	0.000715697	up	1.70322
222067_x_at	HIST1H2BD	0.025479	0.000370177	up	1.69833
209123_at	QDPR	0.00459194	3.52741e-06	up	1.69812
203381_s_at	APOE	0.0409279	0.00108891	up	1.69775
212199_at	MRFAP1L1	0.0204543	0.000206133	up	1.6971
205865_at	ARID3A	0.0413802	0.00111562	up	1.69626
219831_at	CDKL3	0.0344154	0.000742204	up	1.69511
203320_at	SH2B3	0.0382056	0.000920887	up	1.69488
238182_at		0.00458603	2.63207e-06	up	1.69451
223387_at	ZFYVE1	0.0475812	0.00147442	up	1.69416
212406_s_at	PCMTD2	0.00436449	6.9555e-07	up	1.69204
220350_at	ZNF235	0.0330069	0.000689417	up	1.6909
1553992_s_at	NBR2	0.0188014	0.000161277	up	1.68933
235338_s_at	SETDB2	0.0426096	0.00118351	up	1.68542
217971_at	MAPKSP1	0.0205184	0.000210861	up	1.6807
214620_x_at	PAM	0.0246998	0.000334529	up	1.68066
216336_x_at	MT1E /// MT1H /// MT1M /// MT1P2	0.0410035	0.00109281	up	1.67598
235507_at	PCMTD1	0.0239805	0.00030732	up	1.67433
202780_at	OXCT1	0.0449841	0.00131296	up	1.67396
200839_s_at	CTSB	0.0205184	0.000208751	up	1.67385
229444_at	LOC729776	0.030384	0.000562945	up	1.6732
218780_at	HOOK2	0.0450329	0.00133101	up	1.67222
224832_at	DUSP16	0.037581	0.000897478	up	1.66792
217811_at	SELT	0.0163772	0.000119815	up	1.66717
1562053_at		0.0405794	0.00105282	up	1.66698
236616_at		0.0268132	0.000409642	up	1.66624
1569582_at	LOC201651	0.0164114	0.000121265	up	1.66581
1554791_a_at	C2orf67	0.0266774	0.000404003	up	1.66335
223989_s_at	REXO2	0.0387316	0.000961988	up	1.66297
218277_s_at	DHX40	0.0124092	5.26807e-05	up	1.66249
212990_at	SYNJ1	0.00586041	7.71909e-06	up	1.66143
212323_s_at	VPS13D	0.043145	0.00121976	up	1.65752
217455_s_at	SSTR2	0.0403288	0.0010415	up	1.65737
225566_at	NRP2	0.033815	0.000721245	up	1.65611
203337_x_at	ITGB1BP1	0.0397241	0.00100918	up	1.65509
210830_s_at	PON2	0.0154135	0.000105474	up	1.65248
238794_at	C10orf78	0.0227561	0.000275944	up	1.65058
243115_at		0.0407637	0.0010664	up	1.65045
237745_at	LOC641467	0.0386743	0.000959165	up	1.65028
209538_at	ZNF32	0.0472615	0.0014548	up	1.64753
219238_at	PIGV	0.046664	0.00142446	up	1.6453
218834_s_at	TMEM132A	0.0348891	0.000767655	up	1.64261
1560692_at	LOC285878	0.0247195	0.000337635	up	1.64206
225564_at	SPATA13	0.0329575	0.000684799	up	1.64201
215485_s_at	ICAM1	0.00815967	1.77595e-05	up	1.64181
202460_s_at	LPIN2	0.0329536	0.000681071	up	1.64071
209060_x_at	NCOA3	0.0261157	0.000392631	up	1.63956
222406_s_at	PNRC2	0.0193372	0.00017806	up	1.63875
226020_s_at	DAB1 /// OMA1	0.0193372	0.00017961	up	1.6387
206746_at	BFSP1	0.0388312	0.000968538	up	1.6351
209110_s_at	RGL2	0.0255937	0.0003741	up	1.63453
206577_at	VIP	0.0292592	0.000514813	up	1.6329
244194_at		0.0356339	0.000804149	up	1.62765
200847_s_at	TMEM66	0.0303748	0.000559441	up	1.62724
201450_s_at	TIA1	0.0274745	0.000443937	up	1.62358
219283_at	C1GALT1C1	0.0367183	0.000860287	up	1.62321
218228_s_at	TNKS2	0.027705	0.000455055	up	1.62259
209576_at	GNAI1	0.0483044	0.00151605	up	1.62168
218505_at	WDR59	0.0400458	0.00102339	up	1.61885
226668_at	WDSUB1	0.0293734	0.000518841	up	1.6172
226863_at	FAM110C	0.037047	0.000874692	up	1.61628
233098_s_at	EPB41L4B	0.0337983	0.000714662	up	1.61602
218059_at	ZNF706	0.0258283	0.000383448	up	1.61441
210849_s_at	VPS41	0.0364939	0.000845884	up	1.6138
226166_x_at	STK36	0.0449841	0.00131312	up	1.61354
204269_at	PIM2	0.0383851	0.000934442	up	1.61321
231215_at		0.0330069	0.000688607	up	1.61063
205338_s_at	DCT	0.0188854	0.000162632	up	1.61037
220623_s_at	TSGA10	0.0193372	0.00018239	up	1.60902
223194_s_at	SLC22A23	0.0348891	0.000767643	up	1.60833
223886_s_at	RNF146	0.0306981	0.000591222	up	1.60596
200871_s_at	PSAP	0.013754	8.15053e-05	up	1.60203
229873_at	KCTD21	0.0171324	0.000132547	up	1.60175
202193_at	LIMK2	0.00993785	3.085e-05	up	1.60049
235655_at		0.0423674	0.00116389	up	1.59928
228843_at		0.0430484	0.00121016	up	1.59905
1557060_at		0.0417413	0.00113829	up	1.59895
229430_at	C8orf46	0.0492964	0.00157784	up	1.5952
214155_s_at	LARP4	0.0485546	0.00153897	up	1.59491
231381_at	HESRG	0.0164114	0.000121235	up	1.59479
1556187_at		0.0464795	0.00140522	up	1.59415
218935_at	EHD3	0.0493216	0.00157956	up	1.59356
240771_at	C1orf101	0.0428471	0.00119975	up	1.59219
220372_at	DNAJC28	0.0392856	0.000987259	up	1.59155
203912_s_at	DNASE1L1	0.0454971	0.00135977	up	1.59153
212062_at	ATP9A	0.0192882	0.000172098	up	1.59133
213103_at	STARD13	0.048926	0.00156401	up	1.59066
221561_at	SOAT1	0.0416843	0.00113217	up	1.58964
224918_x_at	MGST1	0.0401979	0.0010349	up	1.5869
1557953_at	ZKSCAN1	0.0131726	7.20276e-05	up	1.58658
212503_s_at	DIP2C	0.0090519	2.22385e-05	up	1.58428
221233_s_at	FAM135A	0.0373803	0.000887535	up	1.58394
1554769_at	ZNF785	0.0355603	0.000801286	up	1.58181
202625_at	LYN	0.033815	0.000719853	up	1.5816
216944_s_at	ITPR1	0.039744	0.00101259	up	1.58029
212864_at	CDS2	0.0304611	0.000570422	up	1.58006
1569583_at	EREG	0.0301495	0.000549226	up	1.57997
239303_at		0.027766	0.000462518	up	1.57923
222239_s_at	INTS6	0.0165211	0.000122681	up	1.57898
225992_at	MLLT10	0.0238384	0.000301163	up	1.57835
219356_s_at	CHMP5	0.0354532	0.000796927	up	1.57764
202832_at	GCC2	0.0352494	0.000785325	up	1.57395
203309_s_at	HPS1	0.0302764	0.000553186	up	1.57385
217732_s_at	ITM2B	0.0312508	0.000607583	up	1.57381
236504_x_at	C6orf52	0.010643	3.81668e-05	up	1.57321
204546_at	KIAA0513	0.00577185	7.1097e-06	up	1.5727
223613_at	UQCR	0.0401832	0.00103309	up	1.57257
203355_s_at	PSD3	0.0370759	0.000876801	up	1.57
234005_x_at	STK36	0.0413802	0.00111504	up	1.56601
205199_at	CA9	0.0241774	0.000315732	up	1.5627
224341_x_at	TLR4	0.0296083	0.000530859	up	1.55944
221702_s_at	TM2D3	0.0193372	0.000180285	up	1.55921
222111_at		0.0407637	0.00107058	up	1.55906
201061_s_at	STOM	0.0499462	0.00161783	up	1.55609
224819_at	TCEAL8	0.0329575	0.000685406	up	1.55229
221803_s_at	NRBF2	0.0239805	0.000304725	up	1.55225
212229_s_at	FBXO21	0.0423436	0.0011615	up	1.55154
236407_at	KCNE1	0.0428761	0.00120218	up	1.55142
201807_at	VPS26A	0.027263	0.000433308	up	1.54773
209689_at	CCDC93	0.0196412	0.00019	up	1.54483
217906_at	KLHDC2	0.027284	0.000437643	up	1.54375
225629_s_at	ZBTB4	0.022416	0.00026413	up	1.54315
202126_at	PRPF4B	0.0346738	0.000753137	up	1.54188
201681_s_at	DLG5	0.0205184	0.000212443	up	1.54042
219125_s_at	RAG1AP1	0.0239805	0.000305762	up	1.53753
218067_s_at	ARGLU1	0.0315174	0.000615071	up	1.53625
221619_s_at	MTCH1	0.037581	0.000897747	up	1.53559
200789_at	ECH1	0.022416	0.000263071	up	1.53319
239031_at	SSTR2	0.0425379	0.00117412	up	1.5317
206483_at	LRRC6	0.0135711	7.89322e-05	up	1.53117
226184_at	FMNL2	0.0466634	0.00142194	up	1.52698
235200_at	ZNF561	0.0346738	0.00075411	up	1.52601
211044_at	TRIM14	0.0223019	0.0002582	up	1.52484
217963_s_at	NGFRAP1	0.00458603	2.32714e-06	up	1.523
225978_at	RIMKLB	0.0283936	0.000488716	up	1.52236
217004_s_at	MCF2	0.016089	0.000113774	up	1.52115
228775_at		0.0427081	0.00118887	up	1.51982
203530_s_at	STX4	0.00627244	9.07656e-06	up	1.51269
212754_s_at	MON2	0.0231211	0.000288405	up	1.51205
219295_s_at	PCOLCE2	0.0470721	0.0014438	up	1.51188
224598_at	MGAT4B	0.0436662	0.0012443	up	1.51137
212791_at	C1orf216	0.0104238	3.54609e-05	up	1.51002
223554_s_at	RANGRF	0.0450287	0.00132055	up	1.50857
223870_at	FBXW10	0.0424684	0.00116744	up	1.50703
228477_at	ARGLU1	0.0351526	0.000779849	up	1.50475
230012_at	C17orf44	0.0237539	0.000298472	up	1.50384
222789_at	RSBN1	0.0465874	0.00141411	up	1.50076
235370_at	KREMEN1	0.0465874	0.00141286	up	1.49964
218761_at	RNF111	0.00458603	3.20999e-06	up	1.49884
215120_s_at	SAMD4A	0.0466634	0.00142273	up	1.4982
225131_at	ZRANB1	0.0114869	4.4825e-05	up	1.49749
230297_x_at	SYNGAP1	0.048287	0.00151369	up	1.49727
242414_at	QPRT	0.0239805	0.000307564	up	1.49683
201752_s_at	ADD3	0.024841	0.000345142	up	1.49223
225415_at	DTX3L	0.0302764	0.00055388	up	1.4922
1555193_a_at	ZNF277	0.013754	8.13108e-05	up	1.48867
218514_at	C17orf71	0.00475227	4.01108e-06	up	1.48831
229115_at	DYNC1H1	0.0471519	0.00144749	up	1.48756
222845_x_at	TMBIM4	0.0251778	0.00036156	up	1.48661
212853_at	DCUN1D4	0.0196412	0.000189215	up	1.4864
211628_x_at	FTHP1	0.0247319	0.000341067	up	1.48602
218307_at	RSAD1	0.0130562	6.97731e-05	up	1.48561
242584_at	FAM161A	0.025479	0.000368618	up	1.48537
213035_at	ANKRD28	0.0384695	0.000944063	up	1.48266
213742_at	SFRS11	0.0208881	0.000224258	up	1.48207
236160_at	TRIP11	0.0338846	0.000723862	up	1.48177
202378_s_at	LEPROT	0.025821	0.000382	up	1.4817
233952_s_at	ZNF295	0.0450287	0.00132725	up	1.48075
215111_s_at	TSC22D1	0.0270479	0.000421815	up	1.47823
216322_at	CD58	0.0327237	0.000669138	up	1.47822
222456_s_at	LIMA1	0.0138734	8.39892e-05	up	1.47796
235487_at		0.0473778	0.00146147	up	1.47655
221622_s_at	TMEM126B	0.0223391	0.000261058	up	1.47471
220669_at	OTUD4	0.0306867	0.000584143	up	1.47374
210241_s_at	TP53TG1	0.0373803	0.000887914	up	1.47346
221856_s_at	FAM63A	0.0314684	0.000612965	up	1.47193
635_s_at	PPP2R5B	0.043145	0.0012185	up	1.47137
213361_at	TDRD7	0.0118075	4.88063e-05	up	1.46882
40446_at	PHF1	0.0283936	0.000488243	up	1.46723
218026_at	CCDC56	0.010643	3.83477e-05	up	1.46445
241957_x_at	LIN7B	0.0453234	0.00134457	up	1.46212
201548_s_at	KDM5B	0.0236919	0.000297259	up	1.4611
243662_at		0.0348378	0.000764615	up	1.46032
228038_at	SOX2	0.0384197	0.000938586	up	1.45866
1563969_at	FLJ33360	0.0124092	5.33365e-05	up	1.45286
222565_s_at	PRKD3	0.0188014	0.000160476	up	1.45255
226958_s_at	MED11	0.0475812	0.00147508	up	1.45119
201215_at	PLS3	0.024535	0.000328335	up	1.45002
226722_at	FAM20C	0.0416159	0.00112879	up	1.44551
1560208_at		0.0217391	0.000243334	up	1.44449
217939_s_at	AFTPH	0.0108449	3.99406e-05	up	1.44367
1557189_at	DNASE1	0.0346738	0.000751316	up	1.44185
240710_at		0.0304611	0.000567113	up	1.43931
201657_at	ARL1	0.0130562	6.99576e-05	up	1.43814
220349_s_at	ENGASE	0.0426096	0.00118054	up	1.43622
242263_at	TMED5	0.00993785	3.09716e-05	up	1.43607
204791_at	NR2C1	0.0147969	9.68866e-05	up	1.43303
223443_s_at	FLJ32065	0.0476312	0.0014775	up	1.433
216103_at	ACOT11	0.043145	0.00121548	up	1.43246
225943_at	NLN	0.0352902	0.000790681	up	1.43187
219280_at	BRWD1	0.0321221	0.000645673	up	1.42831
229014_at	FLJ42709	0.0450287	0.00132509	up	1.42781
225632_s_at	RAB43	0.0427186	0.00119155	up	1.42567
225849_s_at	SFT2D1	0.0304611	0.000570023	up	1.42352
212298_at	NRP1	0.0403619	0.0010431	up	1.42305
229123_at		0.0310277	0.000599841	up	1.41928
204611_s_at	PPP2R5B	0.0196412	0.000190409	up	1.41616
218361_at	GOLPH3L	0.0351526	0.000779883	up	1.41517
223885_at	CALN1	0.039744	0.00101196	up	1.41278
205448_s_at	MAP3K12	0.0291034	0.000509388	up	1.41197
204600_at	EPHB3	0.0356339	0.000804248	up	1.41185
204375_at	CLSTN3	0.0450287	0.00131859	up	1.41101
226807_at	ZFP1	0.0321221	0.000645469	up	1.4081
228305_at	ZNF565	0.0324191	0.000659253	up	1.4068
200890_s_at	SSR1	0.027766	0.00046185	up	1.4053
231614_at		0.0474469	0.00146602	up	1.40366
219329_s_at	C2orf28	0.0381333	0.00091506	up	1.40338
203466_at	MPV17	0.0296988	0.00053658	up	1.40023
220343_at	PDE7B	0.020531	0.000213665	up	1.39979
223424_s_at	ZSCAN21	0.00586041	7.99612e-06	up	1.39893
226554_at	ZBTB7A	0.0365233	0.000848369	up	1.39893
228364_at	ZNF784	0.0192882	0.000168663	up	1.39892
222418_s_at	TMEM43	0.0293734	0.000520456	up	1.39882
205601_s_at	HOXB5	0.0388312	0.000965926	up	1.39665
202860_at	DENND4B	0.0191475	0.000165997	up	1.39452
202300_at	HBXIP	0.0274959	0.000445635	up	1.39364
209341_s_at	IKBKB	0.0205184	0.000209714	up	1.39136
227313_at	CNPY4	0.0465874	0.0014153	up	1.38689
224524_s_at	ASB3	0.0130562	7.03506e-05	up	1.38612
1552396_at	WFDC6	0.0478851	0.00149239	up	1.38524
217764_s_at	RAB31	0.0447581	0.00129309	up	1.38493
218209_s_at	RPRD1A	0.0218833	0.000246488	up	1.38234
240435_at		0.0325153	0.000663093	up	1.38186
200663_at	CD63	0.0375186	0.00089482	up	1.38118
203930_s_at	MAPT	0.0293734	0.000520582	up	1.38015
200638_s_at	YWHAZ	0.0248145	0.00034266	up	1.37903
223382_s_at	ZNRF1	0.0498581	0.0016095	up	1.3777
226329_s_at	MITD1	0.0329062	0.000675878	up	1.37739
207132_x_at	PFDN5	0.0272377	0.000431918	up	1.37459
208678_at	ATP6V1E1	0.0363503	0.000830388	up	1.37216
224669_at	SYS1	0.0401784	0.00102983	up	1.37214
218291_at	ROBLD3	0.0433326	0.00123241	up	1.3712
216438_s_at	TMSB4X /// TMSL3	0.0213262	0.000234199	up	1.36947
221610_s_at	STAP2	0.0356379	0.00080499	up	1.36933
209505_at	NR2F1	0.00436449	7.10348e-07	up	1.36894
226168_at	ZFAND2B	0.00969866	2.91051e-05	up	1.36387
218194_at	REXO2	0.0305545	0.000578957	up	1.36326
219128_at	C2orf42	0.0130562	6.90093e-05	up	1.36118
208019_at	ZNF157	0.0260101	0.000390092	up	1.3599
216231_s_at	B2M	0.0147583	9.62413e-05	up	1.35652
234910_at	RASAL2	0.0188014	0.000160305	up	1.35214
1431_at	CYP2E1	0.0296988	0.000536669	up	1.35167
208405_s_at	CD164	0.021449	0.000237787	up	1.35136
243863_at	ZCWPW2	0.0428332	0.00119784	up	1.34949
218464_s_at	C17orf63	0.0251467	0.000355381	up	1.34905
208724_s_at	RAB1A	0.0254722	0.000368048	up	1.34878
210908_s_at	PFDN5	0.0407637	0.00107289	up	1.34845
205586_x_at	VGF	0.0347597	0.000761097	up	1.34827
217873_at	CAB39	0.022019	0.000250495	up	1.3458
201062_at	STOM	0.0347597	0.000761217	up	1.34543
214943_s_at	RBM34	0.0410526	0.00109549	up	1.34518
226291_at	ALS2	0.0242669	0.000320008	up	1.34312
208919_s_at	NADK	0.0440668	0.00126538	up	1.34209
210826_x_at	RAD17	0.0364556	0.00083902	up	1.34141
205571_at	LIPT1	0.0271401	0.000426896	up	1.33755
225127_at	TMEM181	0.0135711	7.83261e-05	up	1.33702
221500_s_at	STX16	0.0146556	9.46215e-05	up	1.33465
226792_s_at	KIFC2	0.0486447	0.00154445	up	1.3335
225808_at	C17orf95	0.0437045	0.00124877	up	1.33291
220929_at	GALNT8	0.0246998	0.000333853	up	1.33203
211684_s_at	DYNC1I2	0.0371226	0.000878586	up	1.33177
219561_at	COPZ2	0.0401832	0.00103333	up	1.33044
213447_at	IPW	0.0472811	0.00145627	up	1.32961
208982_at	PECAM1	0.0130562	6.90714e-05	up	1.32933
201753_s_at	ADD3	0.0304611	0.00056836	up	1.32864
219222_at	RBKS	0.0364556	0.000841118	up	1.32832
207495_at	RAB28	0.043145	0.00121585	up	1.32641
200961_at	SEPHS2	0.0328621	0.000673584	up	1.31971
205223_at	DEPDC5	0.0486631	0.00154601	up	1.31908
207791_s_at	RAB1A	0.0193372	0.000176817	up	1.3166
239289_x_at	MTMR15	0.0406722	0.00105781	up	1.31478
231496_at	FCAMR	0.0171579	0.000133498	up	1.31476
203269_at	NSMAF	0.0417318	0.00113443	up	1.31199
241516_at		0.0188014	0.000159779	up	1.31066
224630_at	C2orf30	0.0479036	0.00149384	up	1.31021
212546_s_at	FRYL	0.0241774	0.000315514	up	1.3086
204494_s_at	C15orf39	0.0389273	0.000973984	up	1.29715
201891_s_at	B2M	0.00458603	1.52564e-06	up	1.29141
202096_s_at	TSPO	0.0347597	0.000760675	up	1.28957
225562_at	RASA3	0.0109873	4.19009e-05	up	1.28953
204382_at	NAT9	0.0321522	0.000648043	up	1.28909
238740_at	AARSD1	0.0408626	0.00108121	up	1.28839
203525_s_at	APC	0.0304611	0.000571864	up	1.28568
210183_x_at	PNN	0.024841	0.000345366	up	1.28497
210891_s_at	GTF2I /// GTF2IP1 /// LOC100093631	0.0337983	0.000717073	up	1.28325
1557638_at		0.0319362	0.000633088	up	1.27285
241624_at	LOC389834	0.048287	0.00151239	up	1.27114
219267_at	GLTP	0.0401832	0.00103121	up	1.26376
240169_at		0.0323957	0.000657097	up	1.26305
1566176_at		0.0341722	0.000733756	up	1.26156
229604_at	CMAH	0.0455961	0.00136601	up	1.26122
227047_x_at	ZBTB4	0.0423246	0.00115962	up	1.25324
218302_at	PSENEN	0.03512	0.000777232	up	1.25263
205584_at	ALG13	0.0205184	0.000211049	up	1.25041
209023_s_at	STAG2	0.0436264	0.00124236	up	1.24125
218937_at	ZNF434	0.0299305	0.000542499	up	1.24063
226128_at		0.0352494	0.000784954	up	1.23815
215482_s_at	EIF2B4	0.0163329	0.000118893	up	1.23778
244720_at		0.0337983	0.00071688	up	1.23764
210441_at	CDC14A	0.0182319	0.000148226	up	1.23599
224967_at	UGCG	0.0125081	5.9023e-05	up	1.23322
221564_at	PRMT2	0.0365135	0.000847473	up	1.2314
1556402_at		0.0476416	0.00147957	up	1.2303
218909_at	RPS6KC1	0.0193372	0.000174504	up	1.22973
1554666_at	LOC100130950	0.0384197	0.000938796	up	1.22535
1560850_at		0.0388312	0.000969891	up	1.21983
224670_at	SYS1	0.0247319	0.000340935	up	1.21781
215016_x_at	DST	0.0197023	0.000191708	up	1.21724
224584_at	C20orf30	0.0364032	0.000833594	up	1.21059
236534_at	BNIPL	0.0466901	0.00142611	up	1.21051
240667_at	SERP2	0.0436726	0.00124528	up	1.2102
200736_s_at	GPX1	0.0409279	0.00108724	up	1.20628
227188_at	C21orf63	0.0386503	0.000954515	up	1.20588
242046_at		0.0165545	0.000123235	up	1.2049
243657_at		0.0426096	0.00118152	up	1.20145
235301_at	KIAA1324L	0.0386261	0.000950199	up	1.1985
209001_s_at	ANAPC13	0.0274959	0.00044523	up	1.19669
225152_at	ZNF622	0.0230669	0.000282866	up	1.19636
215787_at	ACTA2	0.0457351	0.00137101	up	1.19243
235947_at		0.0304611	0.000567654	up	1.19115
216108_at		0.0402037	0.00103607	up	1.18982
215493_x_at	BTN2A1	0.0247319	0.000339925	up	1.18934
1562888_at	GLB1L3	0.0238384	0.00030041	up	1.18798
1558780_a_at	H2AFY	0.0309925	0.000598026	up	1.18793
211256_x_at	BTN2A1	0.0179557	0.000143522	up	1.18603
1555695_a_at	CLRN1	0.0375186	0.000893133	up	1.18238
222432_s_at	CCDC47	0.0411794	0.00110821	up	1.18118
203944_x_at	BTN2A1	0.0364032	0.000833407	up	1.18023
212676_at	NF1	0.0347597	0.000762265	up	1.17699
232868_at	C9orf11	0.0219239	0.000248611	up	1.17333
1562112_at		0.0494958	0.00158759	up	1.16871
1552774_a_at	SLC25A27	0.0387316	0.000962003	up	1.16368
236422_at		0.0454352	0.00135288	up	1.1608
211481_at	SLCO1A2	0.0407637	0.00106307	up	1.15855
213358_at	KIAA0802	0.0478569	0.00148892	up	1.15636
215737_x_at	USF2	0.0361481	0.000820482	up	1.1525
223796_at	CNTNAP3 /// LOC643827	0.0407637	0.00107155	up	1.15168
231608_at		0.0270012	0.000418446	up	1.15123
238244_at	LOC642924	0.0131726	7.23373e-05	up	1.14401
239997_at	LOC100131317	0.0304906	0.000574959	up	1.14084
201999_s_at	DYNLT1	0.0499462	0.00161757	up	1.14034
1554231_a_at	ZNF396	0.0447525	0.00129035	up	1.13631
212333_at	FAM98A	0.0484394	0.00152616	up	1.13005
1558688_at	LOC441461	0.0454971	0.00136221	up	1.11845
240299_at	ADAD1	0.0330134	0.000690156	up	1.10215
1553333_at	C1orf161	0.0495694	0.00159546	up	1.08398
215704_at	FLG	0.0108449	4.00672e-05	down	23.131
207826_s_at	ID3	0.0101169	3.30597e-05	down	15.5337
218755_at	KIF20A	0.0188014	0.000161247	down	13.633
202095_s_at	BIRC5	0.0124092	5.44841e-05	down	12.7094
203764_at	DLGAP5	0.0207755	0.000221118	down	12.3506
232278_s_at	DEPDC1	0.0247195	0.00033658	down	11.6951
202870_s_at	CDC20	0.00969866	2.71797e-05	down	11.2519
220651_s_at	MCM10	0.025479	0.000370866	down	10.7875
210764_s_at	CYR61	0.0274745	0.000444215	down	10.6115
222958_s_at	DEPDC1	0.021449	0.000238126	down	10.5937
205034_at	CCNE2	0.0125081	5.89206e-05	down	10.4449
206023_at	NMU	0.00577205	7.28435e-06	down	10.2898
203418_at	CCNA2	0.0223391	0.000259979	down	10.069
202094_at	BIRC5	0.0101195	3.33151e-05	down	9.97336
201289_at	CYR61	0.0119962	5.00255e-05	down	9.88611
202705_at	CCNB2	0.00753566	1.32253e-05	down	9.8371
204318_s_at	GTSE1	0.0184014	0.000150628	down	9.74864
202274_at	ACTG2	0.0408626	0.00108161	down	9.55358
205422_s_at	ITGBL1	0.00891138	2.04647e-05	down	9.51258
222680_s_at	DTL	0.0393811	0.000994807	down	9.08199
218663_at	NCAPG	0.0302915	0.000556245	down	8.81546
218542_at	CEP55	0.030526	0.000577552	down	8.74321
202068_s_at	LDLR	0.00577185	6.98653e-06	down	8.69284
203755_at	BUB1B	0.00753566	1.46096e-05	down	8.49456
225687_at	FAM83D	0.0304611	0.000569129	down	8.49104
210052_s_at	TPX2	0.0485546	0.00153901	down	8.48792
218883_s_at	MLF1IP	0.0231211	0.000287323	down	8.29447
219918_s_at	ASPM	0.0171324	0.0001322	down	8.23518
212023_s_at	MKI67	0.0364074	0.000834358	down	8.17592
211080_s_at	NEK2	0.0366234	0.000852034	down	8.1578
222039_at	KIF18B	0.020168	0.000200949	down	8.14827
218662_s_at	NCAPG	0.0269228	0.000414212	down	8.04816
204051_s_at	SFRP4	0.0127006	6.08605e-05	down	8.01356
209773_s_at	RRM2	0.0429365	0.00120544	down	7.99884
207165_at	HMMR	0.0192882	0.000170096	down	7.97548
204641_at	NEK2	0.0154135	0.000105425	down	7.92235
200974_at	ACTA2	0.048287	0.00151279	down	7.90169
223785_at	FANCI	0.0366287	0.000853798	down	7.78616
1552619_a_at	ANLN	0.0240066	0.00030955	down	7.67159
202503_s_at	KIAA0101	0.0138382	8.22572e-05	down	7.53293
228323_at	CASC5	0.012794	6.17764e-05	down	7.52179
219493_at	SHCBP1	0.0124092	5.42572e-05	down	7.43455
218039_at	NUSAP1	0.00753566	1.45083e-05	down	7.42636
201292_at	TOP2A	0.0119828	4.97501e-05	down	7.36159
210334_x_at	BIRC5	0.031896	0.000627805	down	7.2698
204052_s_at	SFRP4	0.0182319	0.000148409	down	7.24093
204492_at	ARHGAP11A	0.0488926	0.00156045	down	7.226
228273_at		0.0100552	3.24264e-05	down	7.18794
206364_at	KIF14	0.0226443	0.000273566	down	7.17434
236641_at	KIF14	0.0193372	0.000180554	down	7.15358
218009_s_at	PRC1	0.00753566	1.39179e-05	down	7.13613
215942_s_at	GTSE1	0.045383	0.00134883	down	7.12014
221520_s_at	CDCA8	0.0101169	3.31216e-05	down	7.07639
208079_s_at	AURKA	0.030376	0.0005616	down	7.04031
242890_at		0.0193372	0.000174915	down	6.89969
211713_x_at	KIAA0101	0.0230669	0.000283511	down	6.88032
222962_s_at	MCM10	0.0263324	0.000396371	down	6.83911
201890_at	RRM2	0.0124092	5.70098e-05	down	6.82721
235545_at	DEPDC1	0.0330241	0.000691589	down	6.75164
223381_at	NUF2	0.00891138	2.02909e-05	down	6.68554
211519_s_at	KIF2C	0.0205184	0.000212783	down	6.63845
229551_x_at	ZNF367	0.0147583	9.63643e-05	down	6.63445
204603_at	EXO1	0.0247195	0.000337658	down	6.63353
203145_at	SPAG5	0.0255937	0.00037384	down	6.63307
202954_at	UBE2C	0.0090519	2.20326e-05	down	6.56241
204962_s_at	CENPA	0.0332671	0.00069911	down	6.539
209408_at	KIF2C	0.0130562	6.44046e-05	down	6.46064
213599_at	OIP5	0.0193985	0.000183482	down	6.45834
202580_x_at	FOXM1	0.0192882	0.000172209	down	6.45184
223700_at	MND1	0.0248698	0.000347063	down	6.38405
221521_s_at	GINS2	0.0219986	0.000249861	down	6.36216
222608_s_at	ANLN	0.0246998	0.000331933	down	6.3455
209189_at	FOS	0.0351826	0.000782479	down	6.33683
219148_at	PBK	0.00913395	2.37224e-05	down	6.33031
201291_s_at	TOP2A	0.0329575	0.000685975	down	6.31956
204092_s_at	AURKA	0.0366287	0.000854167	down	6.18423
219978_s_at	NUSAP1	0.00969866	2.76399e-05	down	6.17929
229610_at	CKAP2L	0.0136221	8.02253e-05	down	6.13836
217640_x_at	C18orf24	0.00838218	1.83971e-05	down	6.10968
204128_s_at	RFC3	0.025479	0.000370843	down	6.09599
204822_at	TTK	0.0196412	0.000187168	down	6.08893
209709_s_at	HMMR	0.0323819	0.000656226	down	6.07926
219555_s_at	CENPN	0.016089	0.000114352	down	6.07185
235572_at	SPC24	0.0205184	0.00020969	down	6.06584
213226_at	CCNA2	0.0246998	0.00033456	down	6.01495
218585_s_at	DTL	0.0240564	0.000312163	down	5.99945
235609_at		0.0274379	0.000441045	down	5.9374
220295_x_at	DEPDC1	0.0424822	0.00116938	down	5.88509
210567_s_at	SKP2	0.0407637	0.00107064	down	5.80253
204126_s_at	CDC45L	0.048665	0.00154787	down	5.7548
219306_at	KIF15	0.00436449	3.61614e-07	down	5.68255
1554696_s_at	TYMS	0.030376	0.000562241	down	5.66713
206765_at	KCNJ2	0.00969866	2.95602e-05	down	5.6613
212949_at	NCAPH	0.0148264	9.76118e-05	down	5.65738
201693_s_at	EGR1	0.0269228	0.000414614	down	5.64477
221591_s_at	FAM64A	0.0198985	0.000194308	down	5.58191
229305_at	MLF1IP	0.0165834	0.000124963	down	5.57253
218726_at	HJURP	0.0332478	0.00069749	down	5.54868
209714_s_at	CDKN3	0.0474469	0.00146658	down	5.52888
226936_at	C6orf173	0.0459403	0.00138052	down	5.5156
205046_at	CENPE	0.0278732	0.000466233	down	5.41584
204887_s_at	PLK4	0.0106055	3.70489e-05	down	5.35482
202338_at	TK1	0.0135023	7.60621e-05	down	5.31893
203214_x_at	CDC2	0.0296083	0.000530348	down	5.24063
228069_at	FAM54A	0.0342342	0.000736968	down	5.23871
214710_s_at	CCNB1	0.0337983	0.000716768	down	5.21551
210559_s_at	CDC2	0.0304906	0.000574519	down	5.1969
1555758_a_at	CDKN3	0.0425379	0.00117359	down	5.17371
221436_s_at	CDCA3	0.0208957	0.000227273	down	5.13786
200783_s_at	STMN1	0.0179097	0.000142206	down	5.11583
227350_at	HELLS	0.0346738	0.000752964	down	5.10779
220085_at	HELLS	0.0266854	0.000405101	down	5.10688
204709_s_at	KIF23	0.0231211	0.00028763	down	5.10099
221258_s_at	KIF18A	0.0165545	0.000124403	down	5.09632
202589_at	TYMS	0.0351459	0.000778449	down	5.06253
204162_at	NDC80	0.0193372	0.000176793	down	5.0075
242560_at	FANCD2	0.0192882	0.000170271	down	5.0027
242486_at		0.0188014	0.000158603	down	4.97068
218355_at	KIF4A	0.0153827	0.000103839	down	4.9062
229097_at	DIAPH3	0.017278	0.000135293	down	4.88404
232596_at	DIAPH3	0.0161359	0.00011618	down	4.86306
219502_at	NEIL3	0.0270012	0.0004179	down	4.85942
225834_at	FAM72A /// FAM72B /// FAM72D	0.0247319	0.000340117	down	4.84497
203276_at	LMNB1	0.0181065	0.000145713	down	4.84126
216237_s_at	MCM5	0.0306867	0.000585365	down	4.82438
225655_at	UHRF1	0.0368319	0.000863621	down	4.77018
204170_s_at	CKS2	0.00747573	1.28526e-05	down	4.75587
223307_at	CDCA3	0.044655	0.00128636	down	4.75304
1563933_a_at	PLD5	0.0363503	0.000829621	down	4.7502
203213_at	CDC2	0.027212	0.000429022	down	4.72904
236619_at		0.0321221	0.000640911	down	4.71304
204146_at	RAD51AP1	0.0208556	0.000223527	down	4.69805
205024_s_at	RAD51	0.0230662	0.000281814	down	4.68398
203967_at	CDC6	0.0205283	0.000213262	down	4.67334
1555826_at	EPR1	0.025479	0.000370942	down	4.67273
228281_at	C11orf82	0.0201215	0.000198476	down	4.66213
227165_at	C13orf3	0.00586041	7.98236e-06	down	4.60953
224753_at	CDCA5	0.0362683	0.000823874	down	4.59706
205167_s_at	CDC25C	0.00475227	3.95038e-06	down	4.53362
204444_at	KIF11	0.024841	0.000344015	down	4.52111
228868_x_at	CDT1	0.0282087	0.000480545	down	4.50426
204127_at	RFC3	0.0208556	0.000222934	down	4.48602
203554_x_at	PTTG1	0.00458603	1.12569e-06	down	4.39011
215629_s_at	DLEU2 /// DLEU2L	0.0166779	0.000126591	down	4.3658
212282_at	TMEM97	0.00577185	7.17852e-06	down	4.35914
215224_at	SNORA21	0.013508	7.63414e-05	down	4.33625
227349_at	HELLS	0.0282087	0.000481859	down	4.32519
205909_at	POLE2	0.0465874	0.00141395	down	4.32334
208808_s_at	HMGB2	0.0124092	5.727e-05	down	4.25999
202107_s_at	MCM2	0.00969866	2.79133e-05	down	4.24248
209680_s_at	KIFC1	0.0196412	0.000189029	down	4.22551
1565951_s_at	CHML	0.043145	0.00121929	down	4.20722
1558116_x_at	RECK	0.0124092	5.62168e-05	down	4.10097
226350_at	CHML	0.0329311	0.000678197	down	4.09427
203910_at	ARHGAP29	0.0288216	0.00050184	down	4.08156
226980_at	DEPDC1B	0.0426597	0.00118675	down	4.06737
218782_s_at	ATAD2	0.0364939	0.000845805	down	4.05858
212281_s_at	TMEM97	0.00944157	2.50394e-05	down	4.05815
218741_at	CENPM	0.0363503	0.000830288	down	4.04327
229947_at	PI15	0.00686356	1.11725e-05	down	4.03085
1558750_a_at		0.0408626	0.00107947	down	4.02652
203362_s_at	MAD2L1	0.0295364	0.000524668	down	4.00492
222118_at	CENPN	0.00783698	1.61975e-05	down	3.93491
204825_at	MELK	0.0193985	0.000183784	down	3.88375
230165_at	SGOL2	0.0193372	0.000180137	down	3.87644
210987_x_at	TPM1	0.045383	0.00134839	down	3.86942
1554768_a_at	MAD2L1	0.0340856	0.000729404	down	3.82316
213008_at	FANCI	0.0153126	0.000103065	down	3.8224
204886_at	PLK4	0.016214	0.000117138	down	3.81417
205347_s_at	TMSB15A	0.00458603	1.52428e-06	down	3.80067
204768_s_at	FEN1	0.0486447	0.00154453	down	3.76557
208668_x_at	HMGN2	0.00627244	9.17778e-06	down	3.75136
228559_at	CENPN	0.0115479	4.60437e-05	down	3.73026
202779_s_at	LOC731049 /// UBE2S	0.0352889	0.000790006	down	3.70838
205807_s_at	TUFT1	0.0369432	0.000867799	down	3.70816
1568596_a_at	TROAP	0.0388312	0.000968083	down	3.70391
234863_x_at	FBXO5	0.0461694	0.00139332	down	3.70077
205393_s_at	CHEK1	0.0497659	0.00160471	down	3.68072
228776_at	GJC1	0.0452082	0.00133785	down	3.63067
205029_s_at	FABP7	0.0414622	0.0011217	down	3.59782
221011_s_at	LBH	0.027284	0.000437629	down	3.55549
202458_at	PRSS23	0.0244247	0.000324322	down	3.55048
222848_at	CENPK	0.016089	0.00011498	down	3.54586
203210_s_at	RFC5	0.0347597	0.000760607	down	3.54494
201578_at	PODXL	0.00969866	2.91406e-05	down	3.53889
235019_at	CPM	0.0484217	0.00152275	down	3.50384
218875_s_at	FBXO5	0.0447879	0.00130411	down	3.50356
210986_s_at	TPM1	0.0329575	0.000685466	down	3.50127
201930_at	MCM6	0.0130562	6.93685e-05	down	3.48844
219703_at	MNS1	0.0217391	0.000243229	down	3.47895
222077_s_at	RACGAP1	0.0193372	0.000181537	down	3.44957
227236_at	TSPAN2	0.0321221	0.000642243	down	3.44339
219588_s_at	NCAPG2	0.0417318	0.00113609	down	3.43434
235079_at		0.00994887	3.12978e-05	down	3.37358
201694_s_at	EGR1	0.0391523	0.000981762	down	3.36552
201755_at	MCM5	0.0377528	0.000903166	down	3.35846
227935_s_at	PCGF5	0.0188014	0.000160569	down	3.34462
1553764_a_at	JUB	0.0282087	0.000482242	down	3.33852
204558_at	RAD54L	0.0407637	0.0010701	down	3.33041
242346_x_at		0.0285069	0.000493386	down	3.32735
201555_at	MCM3	0.0162447	0.000117808	down	3.3087
221952_x_at	TRMT5	0.0124092	5.76486e-05	down	3.30073
225533_at	PHF19	0.0454971	0.00136117	down	3.29512
220011_at	C1orf135	0.00753566	1.43745e-05	down	3.28717
235231_at	ZNF789	0.00458603	1.63628e-06	down	3.28047
221923_s_at	NPM1	0.0278992	0.000467659	down	3.27656
207828_s_at	CENPF	0.048665	0.00154874	down	3.27068
218349_s_at	ZWILCH	0.0274535	0.00044205	down	3.2652
205085_at	ORC1L	0.0189978	0.000164342	down	3.25949
238156_at		0.0330657	0.000693065	down	3.23676
203022_at	RNASEH2A	0.00939089	2.47332e-05	down	3.20867
203358_s_at	EZH2	0.0417318	0.00113727	down	3.19128
228890_at	ATOH8	0.00753566	1.43186e-05	down	3.19003
205030_at	FABP7	0.0207755	0.00022153	down	3.18627
224944_at	TMPO	0.0249985	0.000349986	down	3.18085
1558964_at	FAT3	0.0114689	4.44702e-05	down	3.17409
209617_s_at	CTNND2	0.0191843	0.000166864	down	3.16396
206102_at	GINS1	0.0274959	0.000446069	down	3.15299
205436_s_at	H2AFX	0.0217845	0.000244241	down	3.15074
222036_s_at	MCM4	0.0208957	0.000226093	down	3.13544
219544_at	C13orf34	0.0411794	0.00110645	down	3.12668
236029_at	FAT3	0.00458603	1.37949e-06	down	3.12445
239210_at		0.0318456	0.000623225	down	3.11017
231993_at	ITGBL1	0.0161359	0.000116279	down	3.06919
242538_at	TFDP1	0.031896	0.000627832	down	3.06672
204379_s_at	FGFR3	0.0122005	5.13235e-05	down	3.04622
227545_at		0.0393811	0.000995422	down	3.03892
204233_s_at	CHKA	0.0157416	0.000109407	down	3.03658
226456_at	C16orf75	0.00934386	2.44385e-05	down	3.03437
211721_s_at	ZNF551	0.040643	0.00105557	down	3.03388
201202_at	PCNA	0.0196412	0.000190754	down	3.02015
229442_at	C18orf54	0.010491	3.58815e-05	down	3.01325
235266_at	ATAD2	0.0224895	0.000266954	down	3.00361
232411_at		0.0404274	0.00104775	down	3.00355
212801_at	CIT	0.0453971	0.00135091	down	2.97854
205339_at	STIL	0.0465874	0.00141224	down	2.96484
203975_s_at	CHAF1A	0.043145	0.00122054	down	2.94176
204455_at	DST	0.0372311	0.000881833	down	2.93024
229304_s_at	MLF1IP	0.0282087	0.00048199	down	2.92166
244033_at	C14orf145	0.0364939	0.000843805	down	2.92161
228729_at	CCNB1	0.0299825	0.000544697	down	2.91213
222606_at	ZWILCH	0.0147015	9.51866e-05	down	2.89121
212372_at	MYH10	0.0408626	0.0010822	down	2.88991
212141_at	MCM4	0.0139352	8.51848e-05	down	2.88978
208002_s_at	ACOT7	0.0160358	0.000112331	down	2.88619
1566482_at		0.0454675	0.00135562	down	2.87981
224428_s_at	CDCA7	0.0346738	0.000753933	down	2.87762
210601_at	CDH6	0.0447879	0.00130146	down	2.87677
203664_s_at	POLR2D	0.0246998	0.00033322	down	2.85697
219510_at	POLQ	0.0370475	0.000875452	down	2.83815
204531_s_at	BRCA1	0.0192882	0.000172438	down	2.81292
212316_at	NUP210	0.0258283	0.000385158	down	2.75375
223366_at		0.0125079	5.85646e-05	down	2.74972
208613_s_at	FLNB	0.0270479	0.000423754	down	2.74942
203625_x_at	SKP2	0.0375186	0.000894541	down	2.73727
231855_at	KIAA1524	0.0404059	0.00104571	down	2.72378
206316_s_at	KNTC1	0.0296083	0.000530582	down	2.7151
209618_at	CTNND2	0.0355109	0.000798874	down	2.7019
207891_s_at	HAUS7 /// TREX2	0.022416	0.000264851	down	2.69621
225806_at	JUB	0.027766	0.000458707	down	2.6962
225777_at	C9orf140	0.0319362	0.000633277	down	2.68361
213947_s_at	NUP210	0.016089	0.000113535	down	2.67885
1557810_at		0.0411706	0.0011024	down	2.67692
208511_at	PTTG3	0.0411794	0.00110425	down	2.67366
219787_s_at	ECT2	0.0299825	0.000544059	down	2.67049
213951_s_at	PSMC3IP	0.0366495	0.000857333	down	2.65275
238015_at	C4orf46	0.0240051	0.000309091	down	2.6464
204728_s_at	WDHD1	0.0386503	0.000952046	down	2.64601
239106_at	CA5BP	0.0355308	0.00079997	down	2.63136
219105_x_at	ORC6L	0.00891138	2.01196e-05	down	2.61805
235088_at	C4orf46	0.0296988	0.000534223	down	2.61075
223256_at	G2E3	0.0264654	0.000398857	down	2.6011
208828_at	POLE3	0.0213262	0.000235096	down	2.59917
214426_x_at	CHAF1A	0.0477968	0.00148526	down	2.59404
201477_s_at	RRM1	0.0407257	0.00105995	down	2.58698
223519_at	ZAK	0.00458603	1.04505e-06	down	2.58092
1558115_at	RECK	0.0182319	0.000148046	down	2.58091
204695_at	CDC25A	0.039744	0.00101104	down	2.57921
205743_at	STAC	0.016089	0.000114399	down	2.57873
227928_at	C12orf48	0.0266854	0.000404814	down	2.57414
200790_at	ODC1	0.0431845	0.00122267	down	2.57385
214962_s_at	NUP160	0.0152085	0.000101807	down	2.57133
244163_at	SEMA3A	0.0201215	0.000198089	down	2.56096
209054_s_at	WHSC1	0.027766	0.000462215	down	2.54784
211042_x_at	MCAM	0.0335569	0.00070827	down	2.54314
1555976_s_at		0.0106055	3.70306e-05	down	2.53831
235363_at		0.0281329	0.000476986	down	2.5377
216952_s_at	LMNB2	0.0476357	0.00147851	down	2.53694
1554264_at	CKAP2	0.0048944	4.29687e-06	down	2.53612
237107_at	PRKRA /// PRKRAP1	0.0391619	0.000983435	down	2.5268
229441_at	PRSS23	0.0431943	0.00122497	down	2.52087
209191_at	TUBB6	0.0445846	0.00128352	down	2.51941
235496_at	HRCT1	0.0124092	5.68298e-05	down	2.50245
213334_x_at	HAUS7	0.0271401	0.000426013	down	2.50085
230134_s_at	RC3H2	0.0193372	0.00017429	down	2.48551
223714_at	ZNF256	0.0304906	0.000574502	down	2.46968
236429_at	ZNF83	0.0407637	0.0010625	down	2.46685
226355_at	WDR51A	0.0238616	0.000302007	down	2.44302
241954_at	FDFT1	0.0282087	0.00048395	down	2.43419
208821_at	SNRPB	0.0147583	9.60087e-05	down	2.43177
242069_at	CBX5	0.0424694	0.00116825	down	2.42936
220239_at	KLHL7	0.020168	0.000202879	down	2.42719
220241_at	TMCO3	0.0223294	0.000258927	down	2.42448
213175_s_at	SNRPB	0.0148264	9.81645e-05	down	2.4243
201625_s_at	INSIG1	0.0364556	0.000841437	down	2.42127
201136_at	PLP2	0.0426096	0.00117954	down	2.41221
204620_s_at	VCAN	0.0488993	0.00156156	down	2.41078
204159_at	CDKN2C	0.0409279	0.00108771	down	2.40885
203209_at	RFC5	0.0270479	0.000421997	down	2.40476
230133_at	RC3H2	0.0296083	0.000529367	down	2.38223
201939_at	PLK2	0.0193372	0.000181867	down	2.37254
229893_at	FRMD3	0.036476	0.0008426	down	2.37017
1557079_at	ITGBL1	0.0310819	0.000603163	down	2.36519
211006_s_at	KCNB1	0.0138734	8.39262e-05	down	2.36109
238469_at	OGFRL1	0.00436449	8.63234e-07	down	2.36058
230521_at	C9orf100	0.0393811	0.000995264	down	2.36011
1559399_s_at	ZCCHC10	0.0383897	0.000936014	down	2.35645
235518_at	SLC8A1	0.0475812	0.00147504	down	2.3459
201075_s_at	SMARCC1	0.0426096	0.00117886	down	2.33211
212330_at	TFDP1	0.0416125	0.00112793	down	2.32439
221731_x_at	VCAN	0.030526	0.000576961	down	2.32303
204726_at	CDH13	0.0381746	0.000918146	down	2.31996
228286_at	GEN1	0.0321053	0.000638737	down	2.30242
219004_s_at	C21orf45	0.0272322	0.000430835	down	2.296
37892_at	COL11A1	0.0256357	0.000377443	down	2.28792
1557218_s_at	FANCB	0.0484152	0.00152042	down	2.2787
228956_at	UGT8	0.0487311	0.00155262	down	2.27777
218252_at	CKAP2	0.0408359	0.00107689	down	2.27093
201589_at	SMC1A	0.0165545	0.000123737	down	2.26865
208964_s_at	FADS1	0.00969866	2.90558e-05	down	2.26215
220060_s_at	C12orf48	0.0138493	8.32957e-05	down	2.26122
202539_s_at	HMGCR	0.0196412	0.000187226	down	2.25476
201629_s_at	ACP1	0.0454971	0.00136132	down	2.25125
227019_at	C1orf226	0.0324191	0.000659557	down	2.24274
225604_s_at	GLIPR2	0.0114869	4.5446e-05	down	2.22145
228400_at	SHROOM3	0.0310819	0.000602032	down	2.21701
1552729_at	SNHG7	0.0452809	0.00134248	down	2.20999
230082_at	LOC100133660	0.0124092	5.55819e-05	down	2.20306
204320_at	COL11A1	0.00961523	2.64383e-05	down	2.19571
213764_s_at	MFAP5	0.0437045	0.00125019	down	2.18947
202179_at	BLMH	0.0115938	4.66509e-05	down	2.18727
200665_s_at	SPARC	0.0470721	0.00144341	down	2.18272
212315_s_at	NUP210	0.0341496	0.000732647	down	2.18256
231481_at	CCNB3	0.0251467	0.000357241	down	2.17769
225662_at	ZAK	0.0258283	0.000385475	down	2.17702
238666_at		0.0393596	0.000991279	down	2.17634
224582_s_at	NUCKS1	0.0143874	9.05215e-05	down	2.17273
218219_s_at	LANCL2	0.0295364	0.000525631	down	2.17117
209811_at	CASP2	0.0465874	0.0014147	down	2.16157
225602_at	GLIPR2	0.00547383	5.40626e-06	down	2.15647
226446_at	HES6	0.0369477	0.000869053	down	2.15477
227249_at	NDE1	0.030376	0.000560021	down	2.15383
229734_at	LOC283174	0.0282087	0.000484462	down	2.1447
223545_at	FANCD2	0.0470449	0.00144125	down	2.14107
202854_at	HPRT1	0.0400458	0.00102394	down	2.13936
203046_s_at	TIMELESS	0.048926	0.0015642	down	2.13836
209592_s_at	WDR68	0.030526	0.000577594	down	2.13528
229370_at		0.0411153	0.00109814	down	2.13299
203235_at	THOP1	0.0207755	0.000220155	down	2.13194
238670_at		0.0090519	2.23064e-05	down	2.12904
225710_at	GNB4	0.0386743	0.000957521	down	2.12611
31845_at	ELF4	0.0447879	0.00130115	down	2.12591
235985_at		0.027705	0.000455543	down	2.12374
210555_s_at	NFATC3	0.0396039	0.00100469	down	2.12145
238919_at		0.0493382	0.00158099	down	2.12013
201277_s_at	HNRNPAB	0.0352991	0.000791526	down	2.11716
213253_at	SMC2	0.0459524	0.00138172	down	2.11695
213726_x_at	TUBB2C	0.0375186	0.000893659	down	2.11334
206499_s_at	RCC1 /// SNHG3-RCC1	0.00906677	2.30074e-05	down	2.11298
201710_at	MYBL2	0.0384695	0.00094334	down	2.11266
244324_at	C18orf54	0.0417318	0.0011369	down	2.10832
209172_s_at	CENPF	0.0217391	0.000243066	down	2.10814
213571_s_at	EIF4E2	0.0239805	0.00030714	down	2.10503
200853_at	H2AFZ	0.0138493	8.33365e-05	down	2.10112
243907_at		0.0242374	0.000318732	down	2.10034
222946_s_at	C1orf135	0.022886	0.000278357	down	2.09871
208931_s_at	ILF3	0.0196412	0.000189849	down	2.0956
1557756_a_at	C14orf145	0.0157228	0.000108989	down	2.08909
212789_at	NCAPD3	0.00906677	2.26782e-05	down	2.08838
208963_x_at	FADS1	0.00458603	1.95689e-06	down	2.08599
221691_x_at	NPM1	0.0328621	0.000674106	down	2.0771
226630_at	C14orf106	0.0366302	0.000855382	down	2.07639
1554155_at	MCPH1	0.0366302	0.000855882	down	2.07242
215425_at	BTG3	0.0393842	0.000996893	down	2.07026
223290_at	PDXP	0.00747573	1.2742e-05	down	2.06431
206572_x_at	ZNF85	0.0304611	0.000567867	down	2.05048
223255_at	G2E3	0.0384695	0.000942133	down	2.04702
1554493_s_at	THADA	0.0208957	0.000224948	down	2.04474
206707_x_at	FAM65B	0.0329068	0.000676527	down	2.04261
212086_x_at	LMNA	0.032945	0.000679687	down	2.04231
212563_at	BOP1	0.0431943	0.0012269	down	2.04224
235775_at	TMTC2	0.020168	0.000202663	down	2.03146
225303_at	KIRREL	0.0411263	0.00109971	down	2.01885
230426_at	DLD	0.0318254	0.000622247	down	2.01392
224583_at	COTL1	0.0193372	0.000182497	down	2.00962
222862_s_at	AK5	0.0344869	0.000745561	down	2.00921
1553984_s_at	DTYMK	0.0436811	0.00124632	down	2.00891
212206_s_at	H2AFV	0.0349403	0.00077006	down	2.00189
208795_s_at	MCM7	0.00586041	8.00966e-06	down	2.00043
205640_at	ALDH3B1	0.0380274	0.000911664	down	1.99653
232931_at	SNRNP200	0.027766	0.00046107	down	1.99553
211177_s_at	TXNRD2	0.0114869	4.53418e-05	down	1.9921
209162_s_at	PRPF4	0.0417318	0.00113616	down	1.99069
201897_s_at	CKS1B	0.0113625	4.38499e-05	down	1.98853
214431_at	GMPS	0.0494958	0.00158876	down	1.97699
203062_s_at	MDC1	0.0130562	6.73623e-05	down	1.97421
201064_s_at	PABPC4	0.00753566	1.37696e-05	down	1.96817
202189_x_at	PTBP1	0.0270012	0.000419102	down	1.96623
200956_s_at	SSRP1	0.0246998	0.000335091	down	1.96299
221059_s_at	COTL1	0.0143891	9.1612e-05	down	1.95621
215780_s_at	hCG_1644608 /// SET	0.0124092	5.75133e-05	down	1.95185
231895_at	SASS6	0.0251778	0.00036133	down	1.94742
200030_s_at	SLC25A3	0.0249985	0.000350688	down	1.94524
201306_s_at	ANP32B	0.0278106	0.000464315	down	1.94054
225673_at	MYADM	0.0450287	0.00132438	down	1.93803
235711_at	PURB	0.0260537	0.000391222	down	1.93663
217946_s_at	SAE1	0.00755946	1.4794e-05	down	1.93563
226390_at	STARD4	0.0452032	0.00133687	down	1.93462
215215_s_at	LOC81691	0.0306867	0.000588791	down	1.93032
226113_at	ZNF436	0.00961523	2.64118e-05	down	1.9298
211954_s_at	IPO5	0.0188014	0.000159103	down	1.9297
202737_s_at	LSM4	0.025479	0.000370168	down	1.92877
215239_x_at	ZNF273	0.0224799	0.000266429	down	1.92841
229492_at	VANGL1	0.035263	0.000788063	down	1.9281
224976_at	NFIA	0.020168	0.000202246	down	1.92775
223530_at	TDRKH	0.0179097	0.000142491	down	1.92419
235362_at	LOC729970	0.0295975	0.000528291	down	1.922
212168_at	RBM12	0.0477987	0.0014862	down	1.91243
201827_at	SMARCD2	0.048287	0.00151334	down	1.91016
223253_at	EPDR1	0.0384695	0.000944235	down	1.90635
211270_x_at	PTBP1	0.0109873	4.16174e-05	down	1.90451
227119_at	CNOT6L	0.039744	0.00101123	down	1.90402
225548_at	SHROOM3	0.043145	0.00122024	down	1.89766
203270_at	DTYMK	0.0225672	0.000269616	down	1.89479
223211_at	HACL1	0.0103907	3.51432e-05	down	1.89406
238712_at		0.0347597	0.000762191	down	1.88998
213370_s_at	SFMBT1	0.0143891	9.15419e-05	down	1.87731
202944_at	NAGA	0.0278992	0.000468431	down	1.87503
236150_at	LOC123688	0.0288306	0.000503052	down	1.86731
201660_at	ACSL3	0.0135711	7.80046e-05	down	1.86425
204610_s_at	CCDC85B	0.0365673	0.000850061	down	1.85531
229064_s_at	RCAN3	0.0155263	0.000107058	down	1.84554
202468_s_at	CTNNAL1	0.0484217	0.00152328	down	1.84461
208941_s_at	SEPHS1	0.037047	0.000874763	down	1.8444
208614_s_at	FLNB	0.0131726	7.31489e-05	down	1.84159
222424_s_at	NUCKS1	0.0369477	0.000869884	down	1.8403
224920_x_at	MYADM	0.0208957	0.000226586	down	1.83999
227376_at	GLI3	0.017827	0.000140855	down	1.8387
226287_at	CCDC34	0.0438545	0.00125849	down	1.83836
243690_at	TRIOBP	0.0188014	0.000159058	down	1.83824
45633_at	GINS3	0.0321221	0.000643847	down	1.83707
200600_at	MSN	0.0130562	6.83463e-05	down	1.83566
209421_at	MSH2	0.0090519	2.2281e-05	down	1.83531
229790_at	TERF2	0.0390197	0.00097701	down	1.83145
203813_s_at	SLIT3	0.0278106	0.0004644	down	1.82375
200073_s_at	HNRNPD	0.0291264	0.000511411	down	1.82113
209161_at	PRPF4	0.00961523	2.59869e-05	down	1.81603
212219_at	PSME4	0.00625698	8.91075e-06	down	1.81543
200002_at	RPL35	0.0143891	9.21111e-05	down	1.81392
200869_at	RPL18A /// RPL18AP3	0.00686356	1.11673e-05	down	1.8035
208789_at	PTRF	0.0131726	7.29984e-05	down	1.80247
208447_s_at	PRPS1	0.0244247	0.000323794	down	1.80155
209330_s_at	HNRNPD	0.00743031	1.25028e-05	down	1.80152
203744_at	HMGB3	0.0306867	0.000587771	down	1.79999
203032_s_at	FH	0.0281328	0.000475713	down	1.7982
213911_s_at	H2AFZ	0.0223391	0.000260548	down	1.794
228387_at		0.0272632	0.000434433	down	1.79239
203564_at	FANCG	0.0319168	0.000630095	down	1.78974
218997_at	POLR1E	0.0483005	0.00151505	down	1.78896
212115_at	HN1L	0.0149486	9.97941e-05	down	1.78746
213588_x_at	RPL14	0.0473778	0.00146184	down	1.78667
221481_x_at	HNRNPD	0.0450287	0.00132028	down	1.78268
229980_s_at	SNX5	0.0467462	0.00143039	down	1.78074
212599_at	AUTS2	0.0131726	7.18604e-05	down	1.78074
220238_s_at	KLHL7	0.0351826	0.000781377	down	1.779
238951_at		0.0492478	0.00157539	down	1.77826
211710_x_at	RPL4	0.0266774	0.000403761	down	1.77824
212158_at	SDC2	0.0222872	0.000257215	down	1.77522
225906_at		0.0184014	0.000150778	down	1.76526
225694_at	CRKRS	0.00458603	1.88739e-06	down	1.76509
211623_s_at	FBL	0.0321522	0.000647901	down	1.76462
200631_s_at	SET	0.0164765	0.000122048	down	1.76063
209030_s_at	CADM1	0.0428471	0.00120044	down	1.75707
229004_at		0.0386743	0.000958837	down	1.75539
223802_s_at	RBBP6	0.0447879	0.00129756	down	1.74852
218368_s_at	TNFRSF12A	0.0136221	7.95939e-05	down	1.74797
201922_at	TINP1	0.022416	0.000264446	down	1.74451
210231_x_at	SET	0.0437045	0.00124885	down	1.74139
218888_s_at	NETO2	0.0275951	0.000449193	down	1.73891
203462_x_at	EIF3B	0.0461332	0.00139138	down	1.73798
224522_s_at	DCAKD	0.0386743	0.000958068	down	1.73332
214086_s_at	PARP2	0.0231211	0.000287598	down	1.72792
204081_at	NRGN	0.0184198	0.0001514	down	1.72659
202209_at	LSM3	0.020168	0.000201643	down	1.72616
200060_s_at	RNPS1	0.0425379	0.0011748	down	1.72534
218719_s_at	GINS3	0.03512	0.000777206	down	1.72509
227718_at	PURB	0.0293734	0.000519225	down	1.71931
227921_at		0.0208957	0.000225195	down	1.71715
203248_at	ZNF24	0.0408626	0.00108048	down	1.71638
222164_at	FGFR1	0.0383897	0.000936659	down	1.71614
200903_s_at	AHCY	0.0130562	6.91229e-05	down	1.71432
200934_at	DEK	0.0450287	0.00132273	down	1.71204
242283_at	DNAH14	0.0475212	0.00147061	down	1.71032
208688_x_at	EIF3B	0.010643	3.82243e-05	down	1.70671
209932_s_at	DUT	0.0353275	0.000792809	down	1.70534
200088_x_at	RPL12	0.040953	0.00109058	down	1.70521
228949_at	GPR177	0.0259007	0.00038703	down	1.70199
203212_s_at	MTMR2	0.0178277	0.000141187	down	1.70149
208813_at	GOT1	0.034292	0.000738838	down	1.70042
210250_x_at	ADSL	0.0480448	0.0015	down	1.70012
225198_at	VAPA	0.0349499	0.000771157	down	1.69951
223275_at	PRMT6	0.0276114	0.000450884	down	1.69617
203113_s_at	EEF1D	0.0255939	0.00037504	down	1.69606
201154_x_at	RPL4	0.0267239	0.000407151	down	1.69562
200011_s_at	ARF3	0.0497659	0.00160424	down	1.69521
213762_x_at	RBMX	0.0109873	4.2e-05	down	1.69515
238425_at		0.0283936	0.000489341	down	1.6946
225310_at	RBMX	0.0460317	0.00138495	down	1.69351
229779_at	COL4A4	0.0324472	0.00066111	down	1.68995
238435_at	CA5BP	0.0426096	0.00118425	down	1.6878
201920_at	SLC20A1	0.0422607	0.0011571	down	1.68582
218108_at	UBR7	0.0138493	8.32622e-05	down	1.68282
223931_s_at	CHFR	0.0314474	0.00061198	down	1.68071
207168_s_at	H2AFY	0.0277282	0.000456431	down	1.67446
215947_s_at	FAM136A	0.040652	0.00105654	down	1.67436
218258_at	POLR1D	0.0149486	9.93914e-05	down	1.67281
201090_x_at	TUBA1B	0.0411794	0.00110866	down	1.67276
213047_x_at	SET	0.0281328	0.000475955	down	1.66999
200074_s_at	RPL14 /// RPL14P1	0.0291048	0.000510335	down	1.66946
224971_at	MRPL30	0.0293734	0.000518618	down	1.66783
202726_at	LIG1	0.0335451	0.000707407	down	1.66421
208648_at	VCP	0.0192882	0.000170353	down	1.6636
207332_s_at	TFRC	0.0447525	0.00129162	down	1.66311
202633_at	TOPBP1	0.0438237	0.001256	down	1.66208
204451_at	FZD1	0.0188014	0.000158129	down	1.66147
200809_x_at	RPL12	0.0467353	0.0014292	down	1.65945
200681_at	GLO1	0.0432896	0.0012304	down	1.65671
216468_s_at	ZNF682	0.0364556	0.000836844	down	1.65205
208700_s_at	TKT	0.0281329	0.000476667	down	1.64829
207416_s_at	NFATC3	0.0277316	0.000456995	down	1.64618
204752_x_at	PARP2	0.0383632	0.000931101	down	1.64243
209100_at	IFRD2	0.0222614	0.000256103	down	1.64157
226968_at	KIF1B	0.0239805	0.000307695	down	1.6362
229520_s_at	C14orf118	0.00753566	1.3724e-05	down	1.63578
201898_s_at	UBE2A	0.0321251	0.00064632	down	1.62986
201870_at	TOMM34	0.0315742	0.000616758	down	1.62895
218199_s_at	NOL6	0.0124092	5.51824e-05	down	1.62591
203428_s_at	ASF1A	0.0239805	0.000305695	down	1.62579
223780_s_at	MED13	0.0278732	0.000466465	down	1.62127
233903_s_at	SGEF	0.0363503	0.000828227	down	1.62054
222594_s_at	SPATS2	0.0328621	0.000674372	down	1.61593
200931_s_at	VCL	0.0180737	0.000145118	down	1.61562
207598_x_at	XRCC2	0.0342342	0.000735729	down	1.61429
218357_s_at	TIMM8B	0.0205184	0.000211677	down	1.6115
208117_s_at	LAS1L	0.0213262	0.000233791	down	1.61065
209146_at	SC4MOL	0.0422607	0.00115692	down	1.61062
202532_s_at	DHFR	0.0127006	6.08221e-05	down	1.60872
1558766_at		0.0256413	0.000378458	down	1.605
219201_s_at	TWSG1	0.0291048	0.000510498	down	1.60473
200949_x_at	RPS20	0.0267056	0.000406101	down	1.59887
208691_at	TFRC	0.0118075	4.84849e-05	down	1.59743
208854_s_at	STK24	0.0272655	0.000435351	down	1.59581
200907_s_at	PALLD	0.0332615	0.000698386	down	1.59439
209313_at	GPN1	0.0167948	0.000128092	down	1.59434
213302_at	PFAS	0.0135711	7.84255e-05	down	1.59235
223871_x_at	ING5	0.0404059	0.00104563	down	1.58729
1565935_at	LOC91431	0.0148264	9.78744e-05	down	1.58727
204513_s_at	ELMO1	0.0205184	0.000212041	down	1.58577
200089_s_at	RPL4	0.0450287	0.00132888	down	1.58471
207667_s_at	MAP2K3	0.0204707	0.000206673	down	1.58142
212300_at	TXLNA	0.0411153	0.00109866	down	1.57883
201307_at	2011-09-01	0.0438369	0.00125718	down	1.57796
200957_s_at	SSRP1	0.00586041	8.10062e-06	down	1.57408
227145_at	LOXL4	0.0369477	0.00087039	down	1.57289
203492_x_at	CEP57	0.0205184	0.000212486	down	1.57211
218386_x_at	USP16	0.0282087	0.000484313	down	1.57177
219254_at	C17orf101	0.0304611	0.000572731	down	1.57132
212433_x_at	RPS2	0.00458603	3.03057e-06	down	1.57039
214144_at	POLR2D	0.0428471	0.00120058	down	1.56889
213085_s_at	WWC1	0.00961523	2.65551e-05	down	1.56772
209703_x_at	METTL7A	0.0447879	0.00130411	down	1.56703
214948_s_at	TMF1	0.044395	0.00127643	down	1.56509
227283_at	EFR3B	0.00907003	2.32246e-05	down	1.56251
200024_at	RPS5	0.0275742	0.000447972	down	1.56069
1559946_s_at	RUVBL2	0.017107	0.000130819	down	1.55858
215773_x_at	PARP2	0.0403288	0.00104091	down	1.5577
222433_at	ENAH	0.0401832	0.00103251	down	1.55643
211968_s_at	HSP90AA1	0.0255939	0.000375424	down	1.55352
214173_x_at	C19orf2	0.0401708	0.00102861	down	1.54982
200786_at	PSMB7	0.0480448	0.00149968	down	1.54595
244653_at	SETD7	0.0411794	0.00110475	down	1.5412
217466_x_at	RPS2	0.0282087	0.000482533	down	1.53937
223088_x_at	ECHDC1	0.0484955	0.00153419	down	1.53815
215513_at	HYMAI	0.0363503	0.000828532	down	1.53451
209477_at	EMD	0.0381729	0.000917126	down	1.53421
1568873_at	ZNF519	0.0251778	0.000361417	down	1.5305
227072_at	RTTN	0.0191843	0.000167018	down	1.52923
201092_at	RBBP7	0.0130562	6.85354e-05	down	1.5266
227085_at	H2AFV	0.0349151	0.000768867	down	1.52563
226037_s_at	TAF9B	0.0249985	0.000350351	down	1.52416
225684_at	FAM33A	0.0143392	8.90987e-05	down	1.52381
200913_at	PPM1G	0.0163543	0.000119348	down	1.52343
202899_s_at	SFRS3	0.0218841	0.00024776	down	1.52319
208765_s_at	HNRNPR	0.0361163	0.000819099	down	1.52304
201017_at	EIF1AX	0.0324191	0.000659944	down	1.52242
228822_s_at	USP16	0.0286301	0.000496412	down	1.51994
213892_s_at	APRT	0.022416	0.00026446	down	1.51896
202534_x_at	DHFR	0.0447879	0.00130352	down	1.51675
214794_at	PA2G4	0.0242374	0.000317912	down	1.51645
218793_s_at	SCML1	0.0130562	6.48906e-05	down	1.5161
201741_x_at	SFRS1	0.0276309	0.000452275	down	1.51481
200003_s_at	RPL28	0.0304611	0.000572169	down	1.51266
211727_s_at	COX11	0.0255937	0.000373869	down	1.51042
244447_at		0.0466634	0.00142083	down	1.51031
221250_s_at	MXD3	0.0245196	0.000327376	down	1.50972
227700_x_at	ATAD3A	0.0250511	0.000351884	down	1.5095
36936_at	TSTA3	0.0298845	0.000541119	down	1.50842
224731_at	HMGB1	0.0346738	0.000752633	down	1.50698
208692_at	RPS3	0.0258283	0.000383946	down	1.50687
224217_s_at	FAF1	0.0143392	8.91693e-05	down	1.50588
201955_at	CCNC	0.0328621	0.00067296	down	1.4995
200936_at	RPL8	0.0136221	8.01646e-05	down	1.49626
204129_at	BCL9	0.0323421	0.000653645	down	1.49444
210574_s_at	NUDC	0.0192882	0.000172509	down	1.49225
209989_at	ZNF268	0.030153	0.000549841	down	1.49177
205795_at	NRXN3	0.0304611	0.000572399	down	1.49024
218459_at	TOR3A	0.0205785	0.000215288	down	1.48847
244254_at		0.0347597	0.000758186	down	1.48712
225625_at	ALKBH2	0.045889	0.00137774	down	1.48439
200876_s_at	PSMB1	0.0329068	0.000677094	down	1.48431
224562_at	WASF2	0.0393842	0.00099694	down	1.48389
203201_at	PMM2	0.0452377	0.00133955	down	1.48289
217965_s_at	SAP30BP	0.0186816	0.000154783	down	1.48262
200036_s_at	RPL10A	0.00436449	4.61702e-07	down	1.48164
200022_at	RPL18	0.0276506	0.000453132	down	1.48162
227059_at	GPC6	0.0269228	0.000414178	down	1.48045
227477_at	ZMYND19	0.0281328	0.000475553	down	1.47992
218980_at	FHOD3	0.0270479	0.000423302	down	1.47969
230605_at		0.035263	0.000788782	down	1.47884
202985_s_at	BAG5	0.0321221	0.000642639	down	1.47813
236274_at	EIF3B	0.0135711	7.87292e-05	down	1.4777
229456_s_at	DDAH1	0.0495793	0.00159688	down	1.4759
216215_s_at	RBM9	0.00775754	1.56158e-05	down	1.47305
224710_at	RAB34	0.0205184	0.000208274	down	1.4675
200792_at	XRCC6	0.0086932	1.93977e-05	down	1.46555
202975_s_at	RHOBTB3	0.0364556	0.000840024	down	1.45991
204772_s_at	TTF1	0.00891138	2.10255e-05	down	1.45686
201173_x_at	NUDC	0.00436449	8.78086e-07	down	1.45578
235919_at		0.0481086	0.00150375	down	1.45204
212042_x_at	RPL7	0.0427186	0.00119089	down	1.4466
201622_at	SND1	0.0241113	0.000313547	down	1.44641
212104_s_at	RBM9	0.0135711	7.7718e-05	down	1.44567
212191_x_at	RPL13	0.0484955	0.00152921	down	1.44391
219646_at	DEF8	0.0408359	0.00107701	down	1.44366
200005_at	EIF3D	0.0373803	0.000888104	down	1.44349
211061_s_at	MGAT2	0.020168	0.000200812	down	1.4391
203197_s_at	C1orf123	0.017278	0.000134953	down	1.43904
200052_s_at	ILF2	0.0466023	0.00141661	down	1.43769
225797_at	MRPL54	0.0218833	0.000247351	down	1.43395
203040_s_at	HMBS	0.0230181	0.000280806	down	1.42891
221931_s_at	SEH1L	0.0388312	0.000969551	down	1.42843
203818_s_at	SF3A3	0.0251778	0.000362858	down	1.42555
200826_at	SNRPD2	0.0236167	0.000295883	down	1.42487
211566_x_at	BRE	0.0247319	0.000338753	down	1.42309
222906_at	FLVCR1	0.0130562	6.69521e-05	down	1.42298
210011_s_at	EWSR1	0.0258283	0.000383871	down	1.4216
200079_s_at	KARS	0.0306867	0.00058515	down	1.41945
219711_at	ZNF586	0.0291034	0.00050941	down	1.41936
208616_s_at	PTP4A2	0.0454479	0.00135408	down	1.41877
225264_at	RARS2	0.0296988	0.000536666	down	1.41795
239496_at		0.0206357	0.000216264	down	1.41772
219635_at	ZNF606	0.0462041	0.00139521	down	1.4165
200717_x_at	RPL7	0.0437322	0.00125258	down	1.41562
202001_s_at	NDUFA6	0.044299	0.00127286	down	1.41438
213356_x_at	HNRNPA1 /// HNRNPA1L1 /// HNRNPA1L2 /// HNRPA1L-2 /// HNRPA1P5 /// LOC100128836 /// LOC391670 /// LOC402112 /// LOC642817 /// LOC643033 /// LOC644037 /// LOC645001 /// LOC728170 /// LOC728732 /// LOC729366 /// LOC730246 /// RP11-569O4.6	0.0408626	0.00108075	down	1.40922
225372_at	C10orf54	0.0253633	0.000366011	down	1.40916
208985_s_at	EIF3J	0.0461025	0.00138961	down	1.4048
200016_x_at	HNRNPA1	0.035263	0.000788697	down	1.40406
201258_at	RPS16	0.0472609	0.00145392	down	1.40244
204781_s_at	FAS	0.0193372	0.000174631	down	1.40233
214003_x_at	RPS20	0.0411706	0.00110176	down	1.40058
223035_s_at	FARSB	0.0267394	0.000407876	down	1.40052
1555760_a_at	RBM15	0.0383632	0.000928341	down	1.39485
210501_x_at	EIF3K	0.00961523	2.63796e-05	down	1.3939
208645_s_at	RPS14	0.020168	0.00020242	down	1.39363
218622_at	NUP37	0.0447879	0.00129734	down	1.3923
202313_at	PPP2R2A	0.0114869	4.53653e-05	down	1.38728
225974_at	TMEM64	0.027284	0.000436368	down	1.38583
209711_at	SLC35D1	0.0447525	0.00129145	down	1.38551
200630_x_at	SET	0.0465874	0.00141181	down	1.38349
225371_at	GLE1	0.0495134	0.00159204	down	1.38264
209751_s_at	TRAPPC2 /// TRAPPC2P1	0.0306981	0.000590665	down	1.37857
226815_at	C3orf31	0.0205785	0.00021496	down	1.37762
222250_s_at	INTS7	0.0306981	0.000590859	down	1.37643
200062_s_at	RPL30	0.0386503	0.000955035	down	1.37419
203311_s_at	ARF6	0.0131144	7.09989e-05	down	1.37366
225224_at	C20orf112	0.0414622	0.00112301	down	1.3721
208115_x_at	C10orf137	0.0360194	0.000815243	down	1.36946
223287_s_at	FOXP1	0.0414599	0.00112076	down	1.36533
211015_s_at	HSPA4	0.0230669	0.000283453	down	1.3628
225706_at	GLCCI1	0.0487369	0.0015537	down	1.36121
200807_s_at	HSPD1	0.0413968	0.00111754	down	1.35737
225577_at	HCG18	0.0250769	0.000353072	down	1.35651
243772_at	SDCCAG8	0.0452696	0.00134132	down	1.35384
218467_at	PSMG2	0.0388312	0.000968145	down	1.35244
202894_at	EPHB4	0.0382056	0.000920987	down	1.35214
226839_at	NR2C2AP	0.0225869	0.000271415	down	1.35014
212725_s_at	TUG1	0.032316	0.000651934	down	1.34975
200051_at	SART1	0.0472599	0.00145302	down	1.3481
219289_at	HEATR3	0.0287142	0.000498396	down	1.34803
208114_s_at	ISG20L2	0.0348891	0.000767476	down	1.34774
203245_s_at	NCRNA00094	0.033815	0.00071881	down	1.34573
226793_at	LOC283267	0.0321053	0.000638877	down	1.34549
210137_s_at	DCTD	0.0360854	0.000817737	down	1.34184
203107_x_at	RPS2	0.0213262	0.000235567	down	1.33681
205353_s_at	PEBP1	0.00578138	7.40186e-06	down	1.33672
216940_x_at	YBX1 /// YBX1P2	0.0333642	0.00070207	down	1.33437
209503_s_at	PSMC5	0.0171324	0.000132522	down	1.33406
222875_at	DHX33	0.0131726	7.30784e-05	down	1.33344
201386_s_at	DHX15	0.0220771	0.000251963	down	1.33266
200004_at	EIF4G2	0.0488926	0.00155973	down	1.32972
223219_s_at	CNOT10	0.0307466	0.000592719	down	1.32957
36475_at	GCAT	0.00559081	5.62404e-06	down	1.32697
234107_s_at	DTD1	0.0368804	0.000865432	down	1.32587
208770_s_at	EIF4EBP2	0.0364939	0.000846351	down	1.32528
226335_at	RPS6KA3	0.0225471	0.000268874	down	1.32197
218735_s_at	ZNF544	0.0251467	0.000357366	down	1.31906
224936_at	EIF2S3	0.0499462	0.00161426	down	1.31827
219264_s_at	LOC100134089 /// PPP2R3B	0.0319684	0.000634983	down	1.3167
203266_s_at	MAP2K4	0.0291663	0.000512645	down	1.31475
211881_x_at	IGLJ3	0.0431943	0.001224	down	1.30981
222700_at	ATL2	0.0128494	6.25135e-05	down	1.30638
216274_s_at	SEC11A	0.0306867	0.00058658	down	1.30609
203142_s_at	AP3B1	0.0208957	0.000226976	down	1.3053
202174_s_at	PCM1	0.0255937	0.000374485	down	1.30524
207707_s_at	SEC13	0.0231211	0.000286825	down	1.30406
217161_x_at	ACAN	0.0450287	0.00132601	down	1.30327
221538_s_at	PLXNA1	0.0353724	0.000794464	down	1.30326
216381_x_at	AKR7A3	0.0188014	0.000157446	down	1.30218
229563_s_at	RPL10A /// RPL10AP6	0.0302764	0.000553494	down	1.30144
227363_s_at	COX4NB	0.0429075	0.00120384	down	1.30065
217185_s_at	ZNF259 /// ZNF259P	0.0154135	0.000105717	down	1.29845
244166_at	APLN	0.0330137	0.000690768	down	1.29664
204372_s_at	KHSRP	0.0288245	0.000502419	down	1.29586
222723_at	LOC727901	0.00458603	1.97006e-06	down	1.2951
1556924_at	ALS2CR10	0.0221821	0.000253965	down	1.29476
1556476_at	LOC283485	0.0244247	0.000324123	down	1.29376
209862_s_at	CEP57	0.0480851	0.00150214	down	1.29197
211940_x_at	H3F3A /// H3F3B /// LOC440926	0.0411794	0.0011065	down	1.28717
200642_at	SOD1	0.0398313	0.00101554	down	1.28659
203084_at	TGFB1	0.0231211	0.000287255	down	1.28424
200955_at	IMMT	0.0346738	0.00075489	down	1.28184
222568_at	UGCGL1	0.0230669	0.000283487	down	1.27941
221664_s_at	F11R	0.0207755	0.000220774	down	1.27879
214737_x_at	HNRNPC	0.010643	3.81331e-05	down	1.2756
210418_s_at	IDH3B	0.0247195	0.000337731	down	1.27035
202837_at	TRAFD1	0.033815	0.000720819	down	1.26925
242924_at		0.0495083	0.00159097	down	1.26912
231416_at	DHDH	0.0454675	0.00135633	down	1.2669
222160_at	AKAP8L	0.0426096	0.00118286	down	1.26556
221798_x_at		0.0213262	0.000235593	down	1.26281
231360_at	C20orf141	0.0447879	0.00129975	down	1.26233
229469_at	XAGE2 /// XAGE2B	0.0258283	0.000385207	down	1.26161
237725_x_at	SMC5	0.028073	0.000472376	down	1.25697
222503_s_at	WDR41	0.0171579	0.000133074	down	1.25691
212904_at	LRRC47	0.0499462	0.00161694	down	1.2569
201463_s_at	LOC100133665 /// TALDO1	0.0380274	0.000911824	down	1.25423
224903_at	CIRH1A	0.0193372	0.000179478	down	1.24878
210213_s_at	EIF6	0.0193372	0.000179699	down	1.24315
219008_at	C2orf43	0.0276114	0.000450973	down	1.24263
201863_at	FAM32A	0.0393182	0.000988798	down	1.24173
202513_s_at	PPP2R5D	0.0466343	0.00141843	down	1.2393
212626_x_at	HNRNPC	0.0201215	0.000198731	down	1.23875
225044_at	NT5C3L	0.0251778	0.000361961	down	1.23614
204514_at	DPH2	0.0413802	0.00111634	down	1.23491
1552807_a_at	SIGLEC10	0.0283936	0.000489715	down	1.23064
216862_s_at	MTCP1NB	0.0444767	0.00127959	down	1.22439
200997_at	RBM4	0.0437045	0.00124999	down	1.22184
243697_at	MOXD1	0.0222614	0.000255796	down	1.22082
211983_x_at	ACTG1	0.0341496	0.00073188	down	1.22071
218830_at	RPL26L1	0.024841	0.000345739	down	1.21962
213214_x_at	ACTG1	0.0246998	0.000335204	down	1.21798
201544_x_at	PABPN1	0.022416	0.000264521	down	1.20973
207925_at	CST5	0.0349499	0.00077155	down	1.20761
208619_at	DDB1	0.0118075	4.88035e-05	down	1.20706
225961_at	KLHDC5	0.0405794	0.00105317	down	1.20348
210947_s_at	MSH3	0.0196412	0.000188841	down	1.19131
217822_at	WBP11	0.024841	0.000345549	down	1.19042
231172_at	C9orf117	0.010643	3.76553e-05	down	1.18759
208644_at	PARP1	0.0499462	0.00161622	down	1.1788
209077_at	TXN2	0.0269228	0.000413223	down	1.17824
224608_s_at	VPS25	0.032945	0.000679556	down	1.17607
201509_at	IDH3B	0.0201562	0.000199811	down	1.17431
201684_s_at	TOX4	0.0319168	0.000629992	down	1.1728
209540_at	IGF1	0.0295364	0.000525325	down	1.16695
213898_at	RBM9	0.0411794	0.0011075	down	1.16643
219724_s_at	KIAA0748	0.0228389	0.000277367	down	1.16406
203654_s_at	COIL	0.0387641	0.00096352	down	1.1474
243419_at		0.0363904	0.00083197	down	1.1231
1554803_s_at	TRIM72	0.0468372	0.00143403	down	1.12268
205963_s_at	DNAJA3	0.0148264	9.80423e-05	down	1.12095
1560174_at	SPAG16	0.0295763	0.000526882	down	1.08459
